# Supplementary material for: Genome and Phylogenetic Analyses of Trypanosoma evansi Reveal Extensive Similarity to T. brucei and Multiple Independent Origins for Dyskinetoplasty
Source: PubMed Central journal article supplement (PMC4288722; doi:10.1371/journal.pntd.0003404), 2015-01-08
Supplement: pntd.0003404.s007.pdf [file pntd.0003404.s007.pdf]

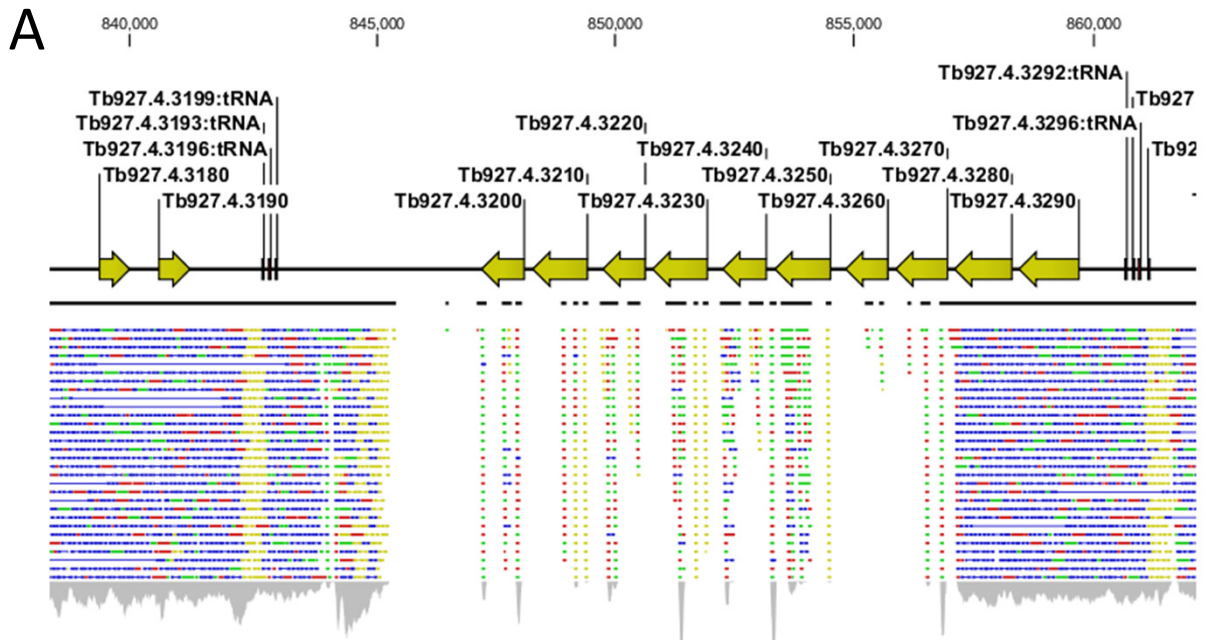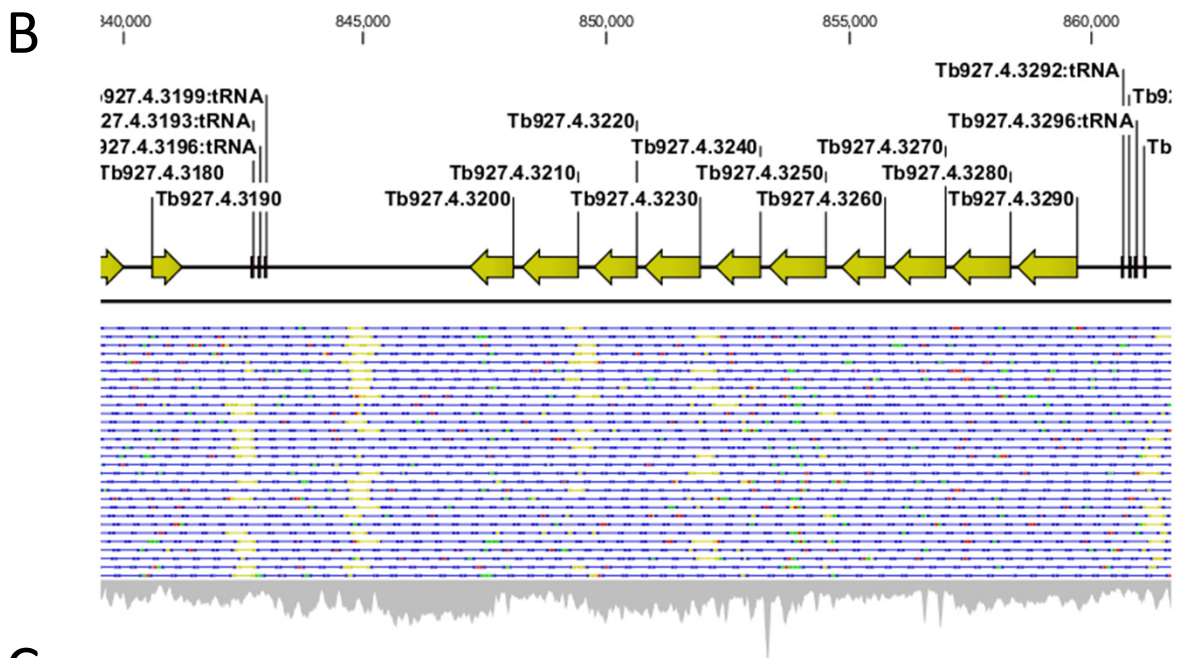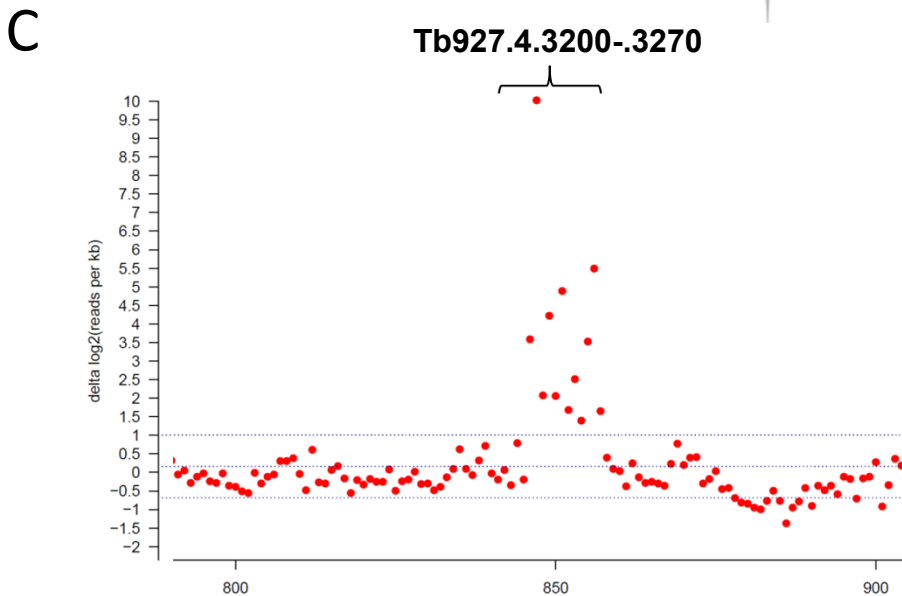

D

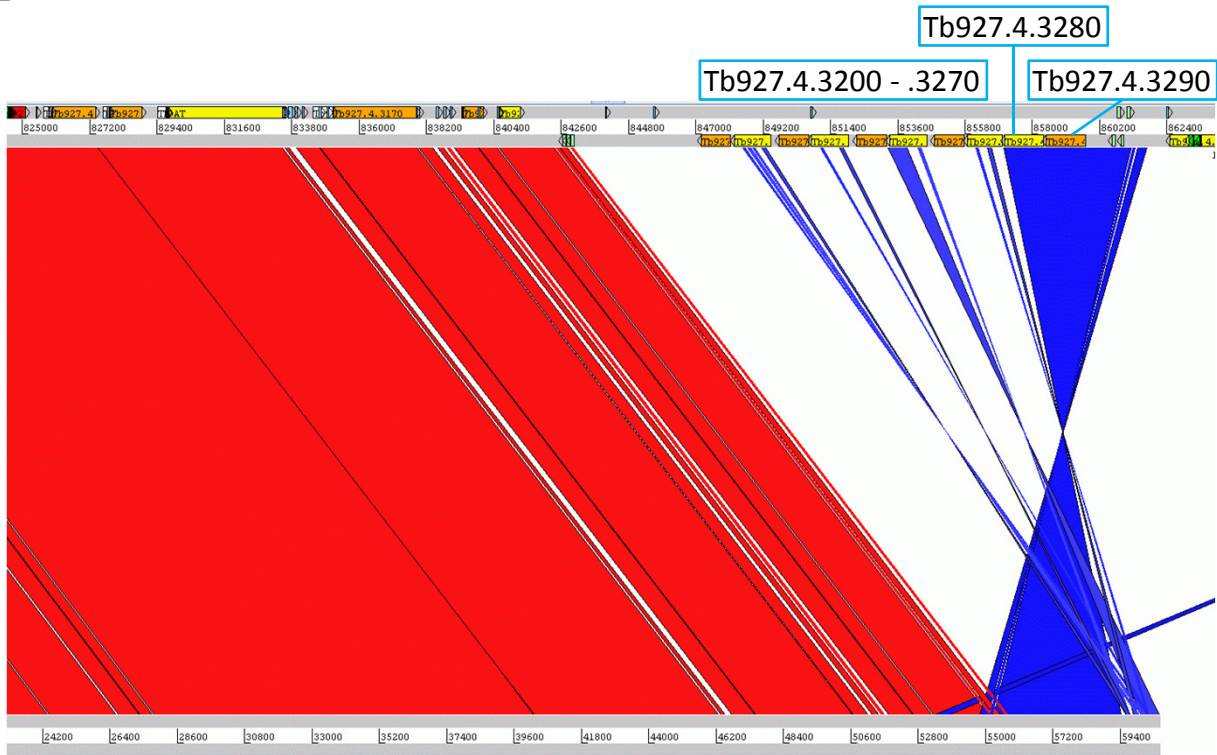

*T. evansi* STIB805 de novo contig
