# Supplementary material for: Genome and Phylogenetic Analyses of Trypanosoma evansi Reveal Extensive Similarity to T. brucei and Multiple Independent Origins for Dyskinetoplasty
Source: PubMed Central journal article supplement (PMC4288722; doi:10.1371/journal.pntd.0003404), 2015-01-08
Supplement: pntd.0003404.s011.pdf [file pntd.0003404.s011.pdf]

# A

|                     |     |                                                                                              |     |
|---------------------|-----|----------------------------------------------------------------------------------------------|-----|
| ORF_contig5566      | 1   | ATGCAAACCAAGGCCTCGTTGGCGTACTCTTATTTGTACTGTATCGGAG                                            | 50  |
|                     |     |                                                                                              |     |
| RoTat1.2 (AF317914) | 1   | atgcaaaccaaggcgctcgttggcgctactcttatttgtactgtatcggag                                          | 50  |
| ORF_contig5566      | 51  | CACAACGGATGCCGCCAATGTAGCTCTTAAAGGCAACGTCTGGAAGCCAT                                           | 100 |
|                     |     |                                                                                              |     |
| RoTat1.2 (AF317914) | 51  | cacaacggatgccgccaatgttagctcttaaaggcaacgtctggaagccat                                          | 100 |
| ORF_contig5566      | 101 | TGTGCGAACTCGCGGCAGCGACCAGGAACGGGCCAAGCCACGGCACGGCG                                           | 150 |
|                     |     |                                                                                              |     |
| RoTat1.2 (AF317914) | 101 | tgtgcgaaactcgcggcagcgaccaggaacgggccaaagccacggcacggcg                                         | 150 |
| ORF_contig5566      | 151 | CAC TTCG CAG C G A T C G A A A A T A G C G T C G A A A C G T A C A C T A A G T T A A A A C T | 200 |
|                     |     |                                                                                              |     |
| RoTat1.2 (AF317914) | 151 | cacttcgcagcgatcgaaaaatagcgtcgaaacgtacactaagttaaaact                                          | 200 |
| ORF_contig5566      | 201 | AAAGCTCTTGATTTACGCGGGCGGCCAAAGGCAGCACCACCGAAGCAAGCG                                          | 250 |
|                     |     |                                                                                              |     |
| RoTat1.2 (AF317914) | 201 | aaagctcttgatttacgcggcgccaaaggcagcaccaccgaagcaagcg                                            | 250 |
| ORF_contig5566      | 251 | CAGCAAGAGGGTTAGCAGCGGCCGAGATAGACACATACGAGCAGCGGCC                                            | 300 |
|                     |     |                                                                                              |     |
| RoTat1.2 (AF317914) | 251 | cagcaagagggttagcagcgccgagatagacacatacgagcagcgcc                                              | 300 |
| ORF_contig5566      | 301 | ACCACGGCGAAAGACAAAAGCAGGGTAATTCTGCCCGAGTTGCCTATGG                                            | 350 |
|                     |     |                                                                                              |     |
| RoTat1.2 (AF317914) | 301 | accacggcgaaagacaaaagcagggtaattctgcccgagttgcctatgg                                            | 350 |
| ORF_contig5566      | 351 | CGGCGAAGTCG CAGGGGCGATTTTCATCGCGCTAAAATTTCTAAAGCAGC                                          | 400 |
|                     |     |                                                                                              |     |
| RoTat1.2 (AF317914) | 351 | cggcgaagtgcagggcgatctcatcgcgctaaaatttctaagcagc                                               | 400 |
| ORF_contig5566      | 401 | CGGTTGGCAACAGCAAGTTTGTGTGGCAAAGCCGACGGCACAAATGCC                                             | 450 |
|                     |     |                                                                                              |     |
| RoTat1.2 (AF317914) | 401 | cggttggcaacagcaagtttgtgtggcgaagccgacggcacaatgcc                                              | 450 |
| ORF_contig5566      | 451 | GACGGTAACAACGAAATCGACGCGCTAGGGTGCGGCGAAGCCAACTATGA                                           | 500 |
|                     |     |                                                                                              |     |
| RoTat1.2 (AF317914) | 451 | gacggtaacaacgaaatcgacgcgctagggtgcgcggaagccaactatga                                           | 500 |
| ORF_contig5566      | 501 | CACCTCGGCCCCAGGAGACAGCTACCTAGAGGGCGACATAAGCGCCGATG                                           | 550 |
|                     |     |                                                                                              |     |
| RoTat1.2 (AF317914) | 501 | cacctcgccccaggagacagctacctagaggcgacataagcgccgatg                                             | 550 |
| ORF_contig5566      | 551 | GCTTCACAAAATAACAGCCGTTGCAGCGGGCAATGGACATGTAGGAAGC                                            | 600 |
|                     |     |                                                                                              |     |
| RoTat1.2 (AF317914) | 551 | gcttcacaaaactaacagccgttcagcgggcaatggacatgtaggaagc                                            | 600 |
| ORF_contig5566      | 601 | AACACCTGCGGGGTGTTTAAAGCAATAACCGGCAACGACGGCAGGCCGG                                            | 650 |
|                     |     |                                                                                              |     |
| RoTat1.2 (AF317914) | 601 | aacacctgCGGGgtgtttaagcaataaccggcaacgacggcgaggccgg                                            | 650 |
| ORF_contig5566      | 651 | CGGGATCAAAATCGCGACCAGCAACATCAAGGTGCACCTCGCACACGGCC                                           | 700 |
|                     |     |                                                                                              |     |
| RoTat1.2 (AF317914) | 651 | cgggatcaaatcgcgaccagcaacatcaaggtgcacctcgcacacggcc                                            | 700 |
| ORF_contig5566      | 701 | TAATCGAAGGCAAAGTTGACGACCAGCCAGAACGAGCAGAATTTTCCAAT                                           | 750 |
|                     |     |                                                                                              |     |
| RoTat1.2 (AF317914) | 701 | taatcgaaggcaagttgacgaccagccagaacgagcagaattttccaat                                            | 750 |
| ORF_contig5566      | 751 | AATTCG GACAAGGAAAAGCACACCACACTGATTATTTAGGCCGAACACA                                           | 800 |
|                     |     |                                                                                              |     |
| RoTat1.2 (AF317914) | 751 | aatttcggacaaggaaaagcacaccacactgattatcttaggccgaacaca                                          | 800 |
| ORF_contig5566      | 801 | CGCAGCACTAATCAATCTGAAGAGGTTGAAATGGAGAAGGTACCGGAAC                                            | 850 |
|                     |     |                                                                                              |     |
| RoTat1.2 (AF317914) | 801 | cgcagcactaatcaatctgaagagggttgaaatggagaaggtaccggaac                                           | 850 |

# B

|                     |      |                                                    |      |
|---------------------|------|----------------------------------------------------|------|
| ORF_contig5566      | 851  | TCACAGAAGAAACCCCTTAAGACTTTAGCAGACGACCCGCGCAACGGCA  | 900  |
|                     |      |                                                    |      |
| RoTat1.2 (AF317914) | 851  | tcacagaagaacccttaagacttttagcagacgacccgcgcaacggca   | 900  |
| ORF_contig5566      | 901  | ACCCTAAACGTTGAGGAATGCGCACGAACAAGCAACAAGAAGATAACAAC | 950  |
|                     |      |                                                    |      |
| RoTat1.2 (AF317914) | 901  | accctaaacgttgaggaatgcgcacgaacaagcaacaagaagataacaac | 950  |
| ORF_contig5566      | 951  | AACAGAACCACCGAAACCGCCATAACCGAAAAATATTTTGGCAAGGACA  | 1000 |
|                     |      |                                                    |      |
| RoTat1.2 (AF317914) | 951  | aacagaaccacccgaaccgcccataaccgaaaaatattttggcaaggaca | 1000 |
| ORF_contig5566      | 1001 | AGTCTAAATCAAGGAGTTGTGGAACAATTTAAAAAAGAGGAGATAGAA   | 1050 |
|                     |      |                                                    |      |
| RoTat1.2 (AF317914) | 1001 | agtctaaatcaaggagttgtggaacaatttaaaaaagaggagatagaa   | 1050 |
| ORF_contig5566      | 1051 | GGAACAGAAGATGACACAACAAAGTAGCGCTAGAAAACCGTCAACTC    | 1100 |
|                     |      |                                                    |      |
| RoTat1.2 (AF317914) | 1051 | ggaacagaagatgacacaacaaagtagcgctagaaacctgcaactc     | 1100 |
| ORF_contig5566      | 1101 | GATCGACAAGCTGCAACAGGCATTGGAGTTTTACACAGCGCGAGCCGCTT | 1150 |
|                     |      |                                                    |      |
| RoTat1.2 (AF317914) | 1101 | gatcgacaagttgcaacaggcattggagttttacacagcgagccgctt   | 1150 |
| ORF_contig5566      | 1151 | ACACAATAGAAAAGTTAAAAAAGAAGTAGATAAGTTGCAAGCAGAATCA  | 1200 |
|                     |      |                                                    |      |
| RoTat1.2 (AF317914) | 1151 | acacaatagaaaagttaaaaaagaagtagataagttgcaagcagaatca  | 1200 |
| ORF_contig5566      | 1201 | GATGCAAAAAACAAAGCAAGCACAAAAGTTACTGAAACAGACGAAACTTG | 1250 |
|                     |      |                                                    |      |
| RoTat1.2 (AF317914) | 1201 | gatgcaaaaaacaagcaagcacaaaagttactgaaacagatgaaacttg  | 1250 |
| ORF_contig5566      | 1251 | CCAAAAGAAAGGAACAGGAGATAACTGCAAACCTCCATGCAAAGTTGTTG | 1300 |
|                     |      | .    .                                             |      |
| RoTat1.2 (AF317914) | 1251 | cgaaaaaaaggaacaggag-----ctgaatgcaaagatggtt         | 1288 |
| ORF_contig5566      | 1301 | GGAAA-----GGTGACACTACAAAGTCAAATTGGAT-----          | 1332 |
|                     |      | .                                                  |      |
| RoTat1.2 (AF317914) | 1289 | gtaaattgaccggcgttgcgcacaataaaaagtgcgtagtgatccggat  | 1338 |
| ORF_contig5566      | 1333 | -----AAGAAAGAAGAAAAAACAGGCAGAAAACCAAGCAAGAGAGAAG   | 1376 |
|                     |      | .  .                                               |      |
| RoTat1.2 (AF317914) | 1339 | tttgtcaaaaaggaag----tagagggagtta---aagc---ggaaaat  | 1377 |
| ORF_contig5566      | 1377 | GATAGGAAACCTGACTGCAGTAAATTTACCAACCACCAA-GCCTGTGAGG | 1425 |
|                     |      |                                                    |      |
| RoTat1.2 (AF317914) | 1378 | gat-ggaaa-----aacaaccacaaacacc--acagg              | 1406 |
| ORF_contig5566      | 1426 | ATGTAA                                             | 1431 |
|                     |      | . .                                                |      |
| RoTat1.2 (AF317914) | 1407 | aagcaa                                             | 1412 |

# C

|                |      |                                                    |      |
|----------------|------|----------------------------------------------------|------|
| ORF_contig5566 | 1223 | CAAAAGT-----TACTGAAACAGACGAAACTTGCCAAAAGAAAGGA     | 1263 |
|                |      | .  .  .  .                                         |      |
| Tb927.8.240    | 1138 | CAGAACTCTCAACAAGAACAGAAACAGACGAAACTTGCGAAAA-AAAGGC | 1186 |
| ORF_contig5566 | 1264 | ACAGGAGATAACTGCAAACCTCCATGCAAAGTTGTTGGGAAAGGTGACAC | 1313 |
|                |      |                                                    |      |
| Tb927.8.240    | 1187 | ACAGGAGATAACTGCAAACCTCCATGCAAAGTTGTTGGGGAAGGTGACGC | 1236 |
| ORF_contig5566 | 1314 | TACAAAGTGCAAATTGGATAAGAAAGAAG-AAAAAACAGGCAGAAAACC  | 1362 |
|                |      | .                                                  |      |
| Tb927.8.240    | 1237 | CGCAAAGTGCAAATTGTATAAGGAAGAAGTAAAAAACAGGGAGAAAACC  | 1286 |
| ORF_contig5566 | 1363 | AAGCAAGAGAGAAGGATAGGAAACCTGACTGCAGTAAATTTACCAACCAC | 1412 |
|                |      |                                                    |      |
| Tb927.8.240    | 1287 | AAGCAAGAGAGAAAGATAGGAAACCTGACTGCAGTAAATTTACCAACCAC | 1336 |
| ORF_contig5566 | 1413 | CAAGCCTGTGAGGATGTAA                                | 1431 |
|                |      | .                                                  |      |
| Tb927.8.240    | 1337 | TAAGCCTTTGAGGATGTAA                                | 1355 |
