# Supplementary material for: Genome and Phylogenetic Analyses of Trypanosoma evansi Reveal Extensive Similarity to T. brucei and Multiple Independent Origins for Dyskinetoplasty
Source: PLoS Negl Trop Dis. 2015 Jan 8;9(1):e3404. doi: 10.1371/journal.pntd.0003404 (PMC4288722; doi:10.1371/journal.pntd.0003404)
Supplement: S6 Table — A spreadsheet showing detailed analyses of sequences predicted to comprise the T. evansi STIB805 mitochondrial proteome, including proteins related to kDNA, editosome, Complexes I-V, and mitochondrial translation. (XLSX) [file pntd.0003404.s020.xlsx]

## Sheet: Mitochondrial Proteome
List of 978 CDS in Tb927_v4 assigned to the mitochondrial proteome and their TevSTIB805ra orthologs
Tb GeneID	Tb GeneDB Annotation	Mito Assignment Confidence	T. evansi Homolog	Strand	Start	Stop	T. evansi Chromosome	Is ORF Frameshifted?
Tb927.1.580	phosphate-repressible phosphate permease, putative	Medium	TevSTIB805.1.520	R	205604	207154	Chr01	NO
Tb927.1.600	phosphate-repressible phosphate permease, putative	Medium	TevSTIB805.1.540	R	209312	210857	Chr01	YES
Tb927.1.730	hypothetical protein, conserved	High	TevSTIB805.1.670	R	230986	232695	Chr01	NO
Tb927.1.740	hypothetical protein, conserved	Medium	TevSTIB805.1.680	R	233533	234840	Chr01	NO
Tb927.1.790	hypothetical protein, conserved	Medium	TevSTIB805.1.730	R	244130	246535	Chr01	NO
Tb927.1.840	hypothetical protein, conserved	Medium	TevSTIB805.1.780	R	253171	253890	Chr01	NO
Tb927.1.1160	hypothetical protein, conserved	High	TevSTIB805.1.1110	F	312759	314348	Chr01	NO
Tb927.1.1200	hypothetical protein, conserved	High	TevSTIB805.1.1140	F	316297	317586	Chr01	NO
Tb927.1.1210	hypothetical protein, conserved	Low	TevSTIB805.1.1150	F	318653	319087	Chr01	NO
Tb927.1.1330	hypothetical protein, conserved	Medium	TevSTIB805.1.1270	F	334390	335610	Chr01	NO
Tb927.1.1390	hypothetical protein, conserved	Low	TevSTIB805.1.1330	F	350026	350763	Chr01	NO
Tb927.1.1580	cytochrome c oxidase assembly factor, putative,electron transport protein SCO1/2, putative	High	TevSTIB805.1.1510	F	396618	397523	Chr01	NO
Tb927.1.1600	hypothetical protein, conserved	Low	TevSTIB805.1.1530	F	398518	403089	Chr01	NO
Tb927.1.1610	hypothetical protein, conserved	Medium	TevSTIB805.1.1540	F	404249	405061	Chr01	NO
Tb927.1.1690	RNA-editing complex protein,RNA editing endoribonuclease	High	TevSTIB805.1.1620	F	418620	421076	Chr01	NO
Tb927.1.1730	hypothetical protein, conserved	Medium	TevSTIB805.1.1660	F	431538	433619	Chr01	NO
Tb927.1.2320	hypothetical protein, conserved	Low	TevSTIB805.1.2230	F	558094	558951	Chr01	NO
Tb927.1.2730	hypothetical protein, conserved	Low	TevSTIB805.1.2640	F	618314	619378	Chr01	NO
Tb927.1.2990	hypothetical protein, conserved	High	TevSTIB805.1.2890	F	653040	656114	Chr01	NO
Tb927.1.3010	hypothetical protein, conserved	Medium	TevSTIB805.1.2910	F	658174	659292	Chr01	NO
Tb927.1.3030	RNA editing ligase,RNA-editing complex protein,KREL2	High	TevSTIB805.1.2930	F	659664	660914	Chr01	NO
Tb927.1.3040	hypothetical protein, conserved	Low	TevSTIB805.1.2940	F	661230	662042	Chr01	NO
Tb927.1.3800	hypothetical protein, conserved	Medium	TevSTIB805.1.3710	F	803278	803823	Chr01	NO
Tb927.1.4010	hypothetical protein, conserved	Low	TevSTIB805.1.3910	F	833825	837574	Chr01	NO
Tb927.1.4100	cytochrome oxidase subunit IV	High	TevSTIB805.1.4000	F	850727	851788	Chr01	NO
Tb927.1.4230	hypothetical protein, conserved	High	TevSTIB805.1.4120	F	862859	864139	Chr01	NO
Tb927.1.5000	hypothetical protein, conserved	Medium	TevSTIB805.1.4900	F	993038	993853	Chr01	NO
Tb927.2.1860	hypothetical protein, conserved	High	TevSTIB805.2.1010	F	346663	349281	Chr02	NO
Tb927.2.2140	hypothetical protein, conserved	Low	TevSTIB805.2.1160	R	407759	408085	Chr02	NO
Tb927.2.2210	hypothetical protein, conserved	Medium	TevSTIB805.2.1210	R	419141	422260	Chr02	NO
Tb927.2.2410	hypothetical protein, conserved	Low	TevSTIB805.2.1340	R	472586	474529	Chr02	NO
Tb927.2.2470	RNA-editing complex protein,KREPA1	High	TevSTIB805.2.1390	R	486104	488392	Chr02	NO
Tb927.2.2510	hypothetical protein, conserved	Medium	TevSTIB805.2.1420	R	492947	493759	Chr02	NO
Tb927.2.2940	hypothetical protein, conserved	High	TevSTIB805.2.1610	F	558252	559151	Chr02	NO
Tb927.2.2970	mitochondrial carrier protein, putative	High	TevSTIB805.2.1630	F	562953	563891	Chr02	NO
Tb927.2.3030	ATP-dependent Clp protease subunit, heat shock protein 78 (HSP78), putative,serine peptidase, putative	High	TevSTIB805.2.1670	F	573669	576107	Chr02	NO
Tb927.2.3180	hypothetical protein, conserved	Medium	TevSTIB805.2.1710	F	586363	589374	Chr02	NO
Tb927.2.3440	D-alanyl-glycyl endopeptidase-like protein,cysteine peptidase, Clan CA, family C51, putative	Medium	TevSTIB805.2.1880	R	630117	630938	Chr02	NO
Tb927.2.3610	hypothetical protein, conserved	High	TevSTIB805.2.1920	R	643621	644055	Chr02	NO
Tb927.2.3800	hypothetical protein, conserved	High	TevSTIB805.2.2000	R	676120	677598	Chr02	NO
Tb927.2.4090	hypothetical protein, conserved	High	TevSTIB805.2.2120	R	717123	717935	Chr02	NO
Tb927.2.4110	mitochondrial processing peptidase alpha subunit, putative,metallo-peptidase, Clan ME, Family M16	High	TevSTIB805.2.2130	R	718698	720107	Chr02	NO
Tb927.2.4380	hypothetical protein, conserved	High	TevSTIB805.2.2270	R	771849	773084	Chr02	NO
Tb927.2.4400	hypothetical protein, conserved	High	TevSTIB805.2.2290	R	776462	780007	Chr02	NO
Tb927.2.4460	hypothetical protein, conserved	Low	TevSTIB805.2.2340	R	787403	789193	Chr02	NO
Tb927.2.4590	branched-chain amino acid aminotransferase, putative	High	TevSTIB805.2.2440	R	816819	817922	Chr02	NO
Tb927.2.4610	branched-chain amino acid aminotransferase, putative	High	TevSTIB805.2.2450	R	818661	819763	Chr02	YES
Tb927.2.4700	hypothetical protein, conserved	High	TevSTIB805.2.2500	R	829644	830099	Chr02	NO
Tb927.2.4740	ribosomal protein L11, putative	High	TevSTIB805.2.2530	R	839326	840354	Chr02	NO
Tb927.2.4800	hypothetical protein, conserved	Low	TevSTIB805.2.2580	R	849615	850688	Chr02	NO
Tb927.2.4830	TFIIF-stimulated CTD phosphatase, putative	Medium	TevSTIB805.2.2600	R	856760	857770	Chr02	NO
Tb927.2.4890	ribosomal protein L11, putative	High	TevSTIB805.2.2640	R	862448	863476	Chr02	NO
Tb927.2.5830	hypothetical protein, conserved	Low	TevSTIB805.2.3310	F	1055868	1056791	Chr02	NO
Tb927.2.5890	hypothetical protein, conserved	Low	TevSTIB805.2.3350	F	1070031	1071389	Chr02	NO
Tb927.2.5930	hypothetical protein, conserved	High	TevSTIB805.2.3380	F	1076404	1077975	Chr02	NO
Tb927.2.5970	hypothetical protein, conserved	Low	TevSTIB805.2.3400	F	1080582	1081844	Chr02	NO
Tb927.2.6070	hypothetical protein, conserved	High	TevSTIB805.2.3440	F	1094578	1095435	Chr02	NO
Tb927.2.6100	hypothetical protein, conserved	Low	TevSTIB805.2.3470	F	1098682	1100145	Chr02	NO
Tb927.3.640	hypothetical protein, conserved	Medium	TevSTIB805.3.570	R	151954	152844	Chr03	NO
Tb927.3.750	hypothetical protein, conserved	High	TevSTIB805.3.680	R	173857	174861	Chr03	NO
Tb927.3.770	hypothetical protein, conserved	High	TevSTIB805.3.700	R	177328	177873	Chr03	NO
Tb927.3.820	hypothetical protein, conserved	High	TevSTIB805.3.750	R	184264	184830	Chr03	NO
Tb927.3.860	acyl carrier protein, mitochondrial precursor, putative	High	TevSTIB805.3.790	R	192895	193341	Chr03	NO
Tb927.3.940	hypothetical protein, conserved	Medium	TevSTIB805.3.870	F	223688	224152	Chr03	NO
Tb927.3.950	hypothetical protein, conserved	Medium	TevSTIB805.3.900	F	226571	227833	Chr03	NO
Tb927.3.970	hypothetical protein, conserved	High	TevSTIB805.3.920	F	230421	231533	Chr03	NO
Tb927.3.1000	frataxin-like, mitochondrial precursor, putative	High	TevSTIB805.3.950	F	237048	237590	Chr03	NO
Tb927.3.1100	hypothetical protein, conserved	Low	TevSTIB805.3.1060	F	259241	260434	Chr03	NO
Tb927.3.1160	hypothetical protein, conserved	Low	TevSTIB805.3.1130	F	271646	272389	Chr03	NO
Tb927.3.1180	hypothetical protein, conserved	Low	TevSTIB805.3.1150	F	274880	277375	Chr03	NO
Tb927.3.1380	ATP synthase beta chain, mitochondrial precursor,ATP synthase F1, beta subunit	High	TevSTIB805.3.1350	F	334770	336329	Chr03	NO
Tb927.3.1410	cytochrome oxidase subunit VII	High	TevSTIB805.3.1380	F	343154	343651	Chr03	NO
Tb927.3.1590	hypothetical protein, conserved	High	TevSTIB805.3.1580	R	404239	406245	Chr03	NO
Tb927.3.1690	hypothetical protein, conserved	High	TevSTIB805.3.1700	R	434348	434785	Chr03	NO
Tb927.3.1710	hypothetical protein, conserved	High	TevSTIB805.3.1720	R	437583	438719	Chr03	NO
Tb927.3.1730	hypothetical protein, conserved	Medium	TevSTIB805.3.1740	R	441129	441824	Chr03	NO
Tb927.3.1790	pyruvate dehydrogenase E1 beta subunit, putative	High	TevSTIB805.3.1800	R	453078	454124	Chr03	NO
Tb927.3.1810	hypothetical protein, conserved	Low	TevSTIB805.3.1820	R	459773	460753	Chr03	NO
Tb927.3.1820	hypothetical protein, conserved	Medium	TevSTIB805.3.1830	R	461769	462506	Chr03	NO
Tb927.3.1840	3-oxo-5-alpha-steroid 4-dehydrogenase, putative	High	TevSTIB805.3.1850	R	467148	468044	Chr03	NO
Tb927.3.1860	hypothetical protein, conserved	Low	TevSTIB805.3.1870	R	472892	475207	Chr03	NO
Tb927.3.1890	hypothetical protein, conserved	High	TevSTIB805.3.1900	R	479919	480773	Chr03	NO
Tb927.3.1940	hypothetical protein, conserved	High	TevSTIB805.3.1960	R	499614	500930	Chr03	NO
Tb927.3.2010	hypothetical protein, conserved	Medium	TevSTIB805.3.2030	R	511558	513225	Chr03	NO
Tb927.3.2050	hypothetical protein, conserved	Low	TevSTIB805.3.2070	R	523303	528021	Chr03	NO
Tb927.3.2080	hypothetical protein, conserved	Medium	TevSTIB805.3.2100	R	537237	538019	Chr03	NO
Tb927.3.2130	hypothetical protein, conserved	Medium	TevSTIB805.3.2150	R	549371	551611	Chr03	NO
Tb927.3.2180	hypothetical protein, conserved	High	TevSTIB805.3.2200	R	562629	563099	Chr03	NO
Tb927.3.2230	succinyl-CoA synthetase alpha subunit, putative	High	TevSTIB805.3.2250	R	569911	570816	Chr03	NO
Tb927.3.2260	hypothetical protein, conserved	High	TevSTIB805.3.2280	R	573688	574374	Chr03	NO
Tb927.3.2300	hypothetical protein, conserved	Medium	TevSTIB805.3.2330	F	581628	582233	Chr03	NO
Tb927.3.2370	hypothetical protein, conserved	Medium	TevSTIB805.3.2400	F	592839	593243	Chr03	NO
Tb927.3.2630	hypothetical protein, conserved	Low	TevSTIB805.3.2690	R	658922	661270	Chr03	NO
Tb927.3.2670	hypothetical protein, conserved	Medium	TevSTIB805.3.2730	R	666550	667359	Chr03	NO
Tb927.3.2810	hypothetical protein, conserved	Low	TevSTIB805.3.2870	R	715231	720258	Chr03	NO
Tb927.3.2880	hypothetical protein, conserved	High	TevSTIB805.3.2940	R	732008	732322	Chr03	NO
Tb927.3.2980	mitochondrial carrier protein, putative	High	TevSTIB805.3.3040	R	755142	756011	Chr03	NO
Tb927.3.3050	hypothetical protein, conserved	Low	TevSTIB805.3.3110	R	767433	770468	Chr03	NO
Tb927.3.3550	hypothetical protein, conserved	Low	TevSTIB805.3.3750	F	983066	986557	Chr03	NO
Tb927.3.3660	hypothetical protein, conserved	High	TevSTIB805.3.3880	F	1011728	1012522	Chr03	NO
Tb927.3.3680	hypothetical protein, conserved	Medium	TevSTIB805.3.3900	F	1015716	1016129	Chr03	NO
Tb927.3.3890	hypothetical protein, conserved	Medium	TevSTIB805.3.4110	F	1068201	1069163	Chr03	NO
Tb927.3.4030	hypothetical protein, conserved	Medium	TevSTIB805.3.4270	R	1121590	1125231	Chr03	NO
Tb927.3.4090	hypothetical protein, conserved	Low	TevSTIB805.3.4330	R	1139062	1140813	Chr03	NO
Tb927.3.4130	hypothetical protein, conserved	Low	TevSTIB805.3.4370	R	1149694	1150275	Chr03	NO
Tb927.3.4210	hypothetical protein, conserved	Medium	TevSTIB805.3.4450	R	1166115	1171427	Chr03	NO
Tb927.3.4260	hypothetical protein, conserved	Medium	TevSTIB805.3.4500	R	1185003	1186109	Chr03	NO
Tb927.3.4380	hypothetical protein, conserved	Low	TevSTIB805.3.4630	R	1212207	1213646	Chr03	NO
Tb927.3.4420	hypothetical protein, conserved	Medium	TevSTIB805.3.4670	R	1228040	1229371	Chr03	NO
Tb927.3.4550	hypothetical protein, conserved	Low	TevSTIB805.3.4800	R	1255262	1257289	Chr03	NO
Tb927.3.4780	hypothetical protein, conserved	Low	TevSTIB805.3.5060	R	1334265	1335539	Chr03	NO
Tb927.3.4920	hypothetical protein, conserved	Medium	TevSTIB805.3.5200	F	1365582	1366718	Chr03	NO
Tb927.3.4950	hypothetical protein, conserved	Low	TevSTIB805.3.5230	F	1373220	1374644	Chr03	NO
Tb927.3.5190	hypothetical protein, conserved	Low	TevSTIB805.3.5480	F	1443127	1444203	Chr03	NO
Tb927.3.5240	hypothetical protein, conserved	High	TevSTIB805.3.5530	F	1457093	1458838	Chr03	NO
Tb927.3.5300	hypothetical protein, conserved	Low	TevSTIB805.3.5600	F	1473824	1474342	Chr03	NO
Tb927.3.5410	hypothetical protein, conserved	Low	TevSTIB805.3.5710	F	1500008	1500619	Chr03	NO
Tb927.3.5430	hypothetical protein, conserved	Low	TevSTIB805.3.5730	F	1505305	1506120	Chr03	NO
Tb927.3.5590	hypothetical protein, conserved	Low	TevSTIB805.3.5890	F	1548957	1551044	Chr03	NO
Tb927.3.5600	hypothetical protein, conserved	Low	TevSTIB805.3.5900	F	1551445	1552260	Chr03	NO
Tb927.3.5610	ribosomal protein L3 mitochondrial, putative	High	TevSTIB805.3.5910	F	1552543	1553964	Chr03	NO
Tb927.3.5630	3,2-trans-enoyl-CoA isomerase, mitochondrial precursor, putative	High	TevSTIB805.3.5930	F	1558304	1559239	Chr03	NO
Tb927.4.320	hypothetical protein, conserved	Medium	TevSTIB805.4.330	R	100640	101896	Chr04	NO
Tb927.4.330	hypothetical protein, conserved	Medium	TevSTIB805.4.340	R	102273	103412	Chr04	NO
Tb927.4.440	hypothetical protein, conserved	High	TevSTIB805.4.460	R	129092	129430	Chr04	NO
Tb927.4.590	hypothetical protein, conserved	Low	TevSTIB805.4.620	R	168450	170906	Chr04	NO
Tb927.4.600	hypothetical protein, conserved	Medium	TevSTIB805.4.630	R	171407	172360	Chr04	NO
Tb927.4.630	hypothetical protein, conserved	Medium	TevSTIB805.4.660	R	183162	184064	Chr04	NO
Tb927.4.700	hypothetical protein, conserved	Low	TevSTIB805.4.740	R	196179	196931	Chr04	NO
Tb927.4.720	hypothetical protein, conserved	High	TevSTIB805.4.760	R	202364	202873	Chr04	NO
Tb927.4.830	hypothetical protein, conserved	Medium	TevSTIB805.4.870	R	232115	232597	Chr04	NO
Tb927.4.840	hypothetical protein, conserved	Low	TevSTIB805.4.880	R	233117	234355	Chr04	NO
Tb927.4.860	hypothetical protein, conserved	Medium	TevSTIB805.4.900	R	235874	236776	Chr04	NO
Tb927.4.930	50S ribosomal protein L14, putative	High	TevSTIB805.4.980	R	259719	260372	Chr04	NO
Tb927.4.970	hypothetical protein, conserved	Low	TevSTIB805.4.1020	R	266578	267141	Chr04	NO
Tb927.4.1070	50S ribosomal protein L13, putative	High	TevSTIB805.4.1120	R	285712	286320	Chr04	NO
Tb927.4.1130	hypothetical protein, conserved	Medium	TevSTIB805.4.1180	R	298159	298656	Chr04	NO
Tb927.4.1280	hypothetical protein, conserved	Low	TevSTIB805.4.1320	R	335418	336614	Chr04	NO
Tb927.4.1370	hypothetical protein, conserved	mt(IFA)	TevSTIB805.4.1410	R	355046	355501	Chr04	NO
Tb927.4.1420	hypothetical protein, conserved	Low	TevSTIB805.4.1460	R	365006	365710	Chr04	NO
Tb927.4.1440	hypothetical protein, conserved	Medium	TevSTIB805.4.1480	R	367730	368347	Chr04	NO
Tb927.4.1500	hypothetical protein, conserved	High	TevSTIB805.4.1550	R	378552	385055	Chr04	NO
Tb927.4.1530	hypothetical protein, conserved	Low	TevSTIB805.4.1580	R	390463	393375	Chr04	NO
Tb927.4.1540	hypothetical protein, conserved	Medium	TevSTIB805.4.1590	R	395802	397328	Chr04	NO
Tb927.4.1590	hypothetical protein, conserved	Low	TevSTIB805.4.1650	R	406007	407062	Chr04	NO
Tb927.4.1600	hypothetical protein, conserved	Medium	TevSTIB805.4.1660	R	407675	408379	Chr04	NO
Tb927.4.1610	hypothetical protein, conserved	Low	TevSTIB805.4.1670	R	409161	410240	Chr04	NO
Tb927.4.1660	mitochondrial carrier protein, putative	High	TevSTIB805.4.1730	R	422865	424022	Chr04	NO
Tb927.4.1670	hypothetical protein, conserved	Low	TevSTIB805.4.1740	R	425321	425782	Chr04	NO
Tb927.4.1760	hypothetical protein, conserved	Medium	TevSTIB805.4.1830	R	442088	442561	Chr04	NO
Tb927.4.1800	ribosomal protein L3, mitochondrial, putative	High	TevSTIB805.4.1870	R	447051	448340	Chr04	NO
Tb927.4.1810	hypothetical protein, conserved	High	TevSTIB805.4.1880	R	449411	449755	Chr04	NO
Tb927.4.2250	hypothetical protein, conserved	Low	TevSTIB805.4.2340	F	580343	581344	Chr04	NO
Tb927.4.2320	hypothetical protein, conserved	Medium	TevSTIB805.4.2420	F	601503	601937	Chr04	NO
Tb927.4.2360	hypothetical protein, conserved	Medium	TevSTIB805.4.2460	F	607088	608050	Chr04	NO
Tb927.4.2430	hypothetical protein, conserved	Low	TevSTIB805.4.2530	F	628757	630721	Chr04	NO
Tb927.4.2440	hypothetical protein, conserved	Medium	TevSTIB805.4.2540	F	631714	632868	Chr04	NO
Tb927.4.2530	hypothetical protein, conserved	Low	TevSTIB805.4.2630	F	664770	665246	Chr04	NO
Tb927.4.2580	hypothetical protein, conserved	Medium	TevSTIB805.4.2680	F	674568	677588	Chr04	NO
Tb927.4.2720	hypothetical protein, conserved	High	TevSTIB805.4.2830	F	713441	715660	Chr04	NO
Tb927.4.2930	hypothetical protein, conserved	Low	TevSTIB805.4.3050	F	775507	776322	Chr04	NO
Tb927.4.3070	hypothetical protein, conserved	Low	TevSTIB805.4.3190	F	809285	810631	Chr04	NO
Tb927.4.3080	hypothetical protein, conserved	Low	TevSTIB805.4.3200	F	811194	811691	Chr04	NO
Tb927.4.3300	mitochondrial ATP-dependent zinc metallopeptidase, putative,metallo-peptidase, Clan MA(E) Family M41	High	TevSTIB805.4.3390	R	852156	854315	Chr04	NO
Tb927.4.3450	hypothetical protein, conserved	High	TevSTIB805.4.3540	R	887593	887937	Chr04	NO
Tb927.4.3660	hypothetical protein, conserved	Medium	TevSTIB805.4.3750	R	917863	919308	Chr04	NO
Tb927.4.3690	hypothetical protein, conserved	High	TevSTIB805.4.3780	R	922473	923792	Chr04	NO
Tb927.4.3800	hypothetical protein, conserved	Low	TevSTIB805.4.3970	R	983063	984031	Chr04	NO
Tb927.4.4160	hypothetical protein, conserved	High	TevSTIB805.4.4340	R	1090462	1093209	Chr04	NO
Tb927.4.4210	ATP-dependent zinc metallopeptidase, putative,metallo-peptidase, Clan MA(E) Family M41	High	TevSTIB805.4.4390	R	1101098	1103731	Chr04	NO
Tb927.4.4300	hypothetical protein, conserved	High	TevSTIB805.4.4480	R	1126900	1128591	Chr04	NO
Tb927.4.4350	hypothetical protein, conserved	Low	TevSTIB805.4.4530	R	1135448	1136059	Chr04	NO
Tb927.4.4600	hypothetical protein, conserved	High	TevSTIB805.4.4780	R	1262895	1263677	Chr04	NO
Tb927.4.4610	hypothetical protein, conserved	High	TevSTIB805.4.4790	R	1263975	1264934	Chr04	NO
Tb927.4.4620	cytochrome oxidase subunit VIII	High	TevSTIB805.4.4800	R	1265600	1266073	Chr04	NO
Tb927.4.4850	amino acid transporter, putative	Medium	TevSTIB805.4.5040	R	1313402	1314754	Chr04	NO
Tb927.4.4910	3,2-trans-enoyl-CoA isomerase, mitochondrial precursor, putative	High	TevSTIB805.4.5100	R	1332186	1333388	Chr04	NO
Tb927.4.5120	hypothetical protein, conserved	Low	TevSTIB805.4.5340	R	1388545	1392641	Chr04	YES
Tb04.24M18.150	hypothetical protein, conserved	Medium	TevSTIB805.4.5600	R	1445941	1446429	Chr04	NO
Tb927.5.320	receptor-type adenylate cyclase GRESAG 4, putative,adenylyl cyclase, putative	Medium	TevSTIB805.5.300	R	71896	75606	Chr05	NO
Tb927.5.440	trans-sialidase, putative;evidence=Inferred by Curator	Low	TevSTIB805.5.420	R	124744	127071	Chr05	NO
Tb927.5.450	NADH-ubiquinone oxidoreductase, mitochondrial, putative	High	TevSTIB805.5.440	R	129228	130718	Chr05	NO
Tb927.5.510	hypothetical protein, conserved	High	TevSTIB805.5.500	R	151868	152251	Chr05	NO
Tb927.5.530	hypothetical protein, conserved	Medium	TevSTIB805.5.520	R	157030	159015	Chr05	NO
Tb927.5.560	hypothetical protein, conserved	Low	TevSTIB805.5.550	R	162692	164173	Chr05	NO
Tb927.5.630	acidic phosphatase, putative	Medium	TevSTIB805.5.650	R	198770	199975	Chr05	NO
Tb927.5.740	hypothetical protein, conserved	Medium	TevSTIB805.5.850	F	244767	245396	Chr05	NO
Tb927.5.770	hypothetical protein, conserved	Low	TevSTIB805.5.880	F	253207	255387	Chr05	NO
Tb927.5.920	hypothetical protein, conserved	Low	TevSTIB805.5.1040	F	296725	298240	Chr05	YES
Tb927.5.960	hypothetical protein, conserved	Low	TevSTIB805.5.1090	F	312663	313670	Chr05	NO
Tb927.5.980	hypothetical protein, conserved	Low	TevSTIB805.5.1110	F	314583	315500	Chr05	NO
Tb927.5.1030	hypothetical protein, conserved	Low	TevSTIB805.5.1160	F	327305	327826	Chr05	NO
Tb927.5.1060	mitochondrial processing peptidase, beta subunit, putative,metallo-peptidase, Clan ME, Family M16	High	TevSTIB805.5.1190	F	332903	334372	Chr05	NO
Tb927.5.1090	threonyl-tRNA synthetase, putative	High	TevSTIB805.5.1230	F	342162	344561	Chr05	NO
Tb927.5.1120	hypothetical protein, conserved	High	TevSTIB805.5.1270	F	354981	373036	Chr05	YES
Tb927.5.1210	short-chain dehydrogenase, putative	High	TevSTIB805.5.1370	F	394400	395335	Chr05	NO
Tb927.5.1240	hypothetical protein, conserved	Low	TevSTIB805.5.1400	F	400612	401670	Chr05	NO
Tb927.5.1510	hypothetical protein, conserved	High	TevSTIB805.5.1690	R	467176	468111	Chr05	NO
Tb927.5.1530	hypothetical protein, conserved	Low	TevSTIB805.5.1720	R	471583	473199	Chr05	NO
Tb927.5.1550	mitochondrial carrier protein, putative	High	TevSTIB805.5.1740	R	477005	477937	Chr05	NO
Tb927.5.1710	ribonucleoprotein p18, mitochondrial precursor, putative	High	TevSTIB805.5.1920	F	529804	530370	Chr05	NO
Tb927.5.1720	hypothetical protein, conserved	Low	TevSTIB805.5.1940	F	531936	533825	Chr05	NO
Tb927.5.1790	hypothetical protein, conserved	High	TevSTIB805.5.2010	F	546872	548767	Chr05	NO
Tb927.5.1900	hypothetical protein, conserved	Low	TevSTIB805.5.2130	F	577350	579398	Chr05	NO
Tb927.5.2070	hypothetical protein, conserved	High	TevSTIB805.5.2390	R	641517	643421	Chr05	NO
Tb927.5.2100	hypothetical protein, conserved	Low	TevSTIB805.5.2420	R	651659	653056	Chr05	NO
Tb927.5.2150	hypothetical protein, conserved	Medium	TevSTIB805.5.2480	R	666717	668306	Chr05	NO
Tb927.5.2340	hypothetical protein, conserved	Low	TevSTIB805.5.2730	F	731418	733052	Chr05	NO
Tb927.5.2560	hypothetical protein, conserved	Low	TevSTIB805.5.2970	F	812314	812535	Chr05	NO
Tb927.5.2580	hypothetical protein, conserved	High	TevSTIB805.5.2990	F	816117	817279	Chr05	YES
Tb927.5.2780	mitochondrial DNA polymerase beta	High	TevSTIB805.5.3220	R	867257	868480	Chr05	NO
Tb927.5.2810	hypothetical protein, conserved	Medium	TevSTIB805.5.3250	R	877080	877613	Chr05	NO
Tb927.5.2860	hypothetical protein, conserved	Low	TevSTIB805.5.3300	R	887353	888651	Chr05	NO
Tb927.5.2930	hypothetical protein, conserved	High	TevSTIB805.5.3380	F	913509	914621	Chr05	NO
Tb927.5.3000	hypothetical protein, conserved	Low	TevSTIB805.5.3460	F	930526	931572	Chr05	NO
Tb927.5.3010	hypothetical protein, conserved	High	TevSTIB805.5.3470	F	931841	933391	Chr05	NO
Tb927.5.3040	hypothetical protein, conserved	High	TevSTIB805.5.3510	F	941258	941854	Chr05	NO
Tb927.5.3090	hypothetical protein, conserved	High	TevSTIB805.5.3560	F	950668	950973	Chr05	NO
Tb927.5.3110	hypothetical protein, conserved	High	TevSTIB805.5.3590	R	956506	957162	Chr05	NO
Tb927.5.3140	hypothetical protein, conserved	Low	TevSTIB805.5.3620	R	964274	964924	Chr05	NO
Tb927.5.3300	hypothetical protein, conserved	High	TevSTIB805.5.3790	R	1026078	1026569	Chr05	NO
Tb927.5.3330	hypothetical protein, conserved	Low	TevSTIB805.5.3830	R	1035145	1049223	Chr05	NO
Tb927.5.3340	hypothetical protein, conserved	Medium	TevSTIB805.5.3840	R	1050091	1050378	Chr05	NO
Tb927.5.3350	iron superoxide dismutase, putative	High	TevSTIB805.5.3850	R	1051534	1052250	Chr05	NO
Tb927.5.3360	50S ribosomal protein L2, putative	High	TevSTIB805.5.3860	R	1053191	1054426	Chr05	NO
Tb927.5.3400	calcium-translocating P-type ATPase,calcium pump	High	TevSTIB805.5.3900	R	1062042	1065077	Chr05	NO
Tb927.5.3410	hypothetical protein, conserved	High	TevSTIB805.5.3910	R	1065548	1066339	Chr05	NO
Tb927.5.3550	hypothetical protein, conserved	Low	TevSTIB805.5.4070	F	1103399	1104673	Chr05	NO
Tb927.5.3640	hypothetical protein, conserved	High	TevSTIB805.5.4160	F	1131653	1132465	Chr05	NO
Tb927.5.3870	hypothetical protein, conserved	High	TevSTIB805.5.4430	F	1192521	1194716	Chr05	NO
Tb927.5.3980	hypothetical protein, conserved	High	TevSTIB805.5.4540	F	1216698	1217822	Chr05	NO
Tb927.5.4040	hypothetical protein, conserved	High	TevSTIB805.5.4600	R	1231797	1234250	Chr05	NO
Tb927.5.4080	hypothetical protein, conserved	Medium	TevSTIB805.5.4640	R	1240073	1241674	Chr05	NO
Tb927.5.4120	hypothetical protein, conserved	High	TevSTIB805.5.4680	R	1248888	1249463	Chr05	NO
Tb927.5.4360	hypothetical protein, conserved	Low	TevSTIB805.5.4910	R	1285805	1286776	Chr05	NO
Tb927.6.330	receptor-type adenylate cyclase GRESAG 4, putative	Medium	TevSTIB805.6.260	R	120050	124471	Chr06	YES
Tb927.6.590	hypothetical protein, conserved	High	TevSTIB805.6.630	R	238961	239257	Chr06	NO
Tb927.6.610	hypothetical protein, conserved	Low	TevSTIB805.6.650	R	243671	245410	Chr06	NO
Tb927.6.680	hypothetical protein, conserved	Low	TevSTIB805.6.720	R	279292	280350	Chr06	NO
Tb927.6.1200	hypothetical protein, conserved	Medium	TevSTIB805.6.1270	R	454668	456074	Chr06	NO
Tb927.6.1250	hypothetical protein, conserved	High	TevSTIB805.6.1320	R	462720	464216	Chr06	NO
Tb927.6.1410	hypothetical protein, conserved	High	TevSTIB805.6.1460	R	494305	494994	Chr06	NO
Tb927.6.1440	hypothetical protein, conserved	High	TevSTIB805.6.1490	R	499198	500106	Chr06	NO
Tb927.6.1450	hypothetical protein, conserved	Low	TevSTIB805.6.1500	R	500519	501361	Chr06	NO
Tb927.6.1590	hypothetical protein, conserved	Medium	TevSTIB805.6.1640	R	533904	535307	Chr06	NO
Tb927.6.1630	hypothetical protein, conserved	Low	TevSTIB805.6.1680	R	541270	542319	Chr06	NO
Tb927.6.1680	zinc finger protein, putative	High	TevSTIB805.6.1730	R	555113	556786	Chr06	NO
Tb927.6.1700	hypothetical protein, conserved	Low	TevSTIB805.6.1750	R	559013	559585	Chr06	NO
Tb927.6.1840	hypothetical protein, conserved	Low	TevSTIB805.6.1890	R	597308	598342	Chr06	NO
Tb927.6.1860	hypothetical protein, conserved	Medium	TevSTIB805.6.1910	R	606959	607987	Chr06	NO
Tb927.6.1890	hypothetical protein, conserved	Medium	TevSTIB805.6.1940	R	613619	615427	Chr06	NO
Tb927.6.2010	hypothetical protein, conserved	High	TevSTIB805.6.2060	R	641345	642916	Chr06	NO
Tb927.6.2080	hypothetical protein, conserved	High	TevSTIB805.6.2130	R	662023	663213	Chr06	NO
Tb927.6.2140	hypothetical protein, conserved	Medium	TevSTIB805.6.2190	R	669799	670602	Chr06	NO
Tb927.6.2180	hypothetical protein, conserved	High	TevSTIB805.6.2250	F	682985	683725	Chr06	NO
Tb927.6.2190	hypothetical protein, conserved	Low	TevSTIB805.6.2260	F	684880	685746	Chr06	NO
Tb927.6.2230	hypothetical protein, conserved	Medium	TevSTIB805.6.2300	F	691954	694339	Chr06	YES
Tb927.6.2290	hypothetical protein, conserved	Low	TevSTIB805.6.2360	F	702378	705152	Chr06	NO
Tb927.6.2320	hypothetical protein, conserved	Medium	TevSTIB805.6.2390	F	707518	708084	Chr06	NO
Tb927.6.2380	hypothetical protein, conserved	Medium	TevSTIB805.6.2450	F	720629	722794	Chr06	NO
Tb927.6.2420	p22 protein precursor	High	TevSTIB805.6.2490	F	729984	730667	Chr06	NO
Tb927.6.2480	chaperone protein DNAj, putative	High	TevSTIB805.6.2550	F	743991	745151	Chr06	NO
Tb927.6.2490	hypothetical protein, conserved	Medium	TevSTIB805.6.2560	F	745437	746310	Chr06	YES
Tb927.6.2510	hypothetical protein, conserved	Medium	TevSTIB805.6.2580	F	749289	749729	Chr06	NO
Tb927.6.2630	hypothetical protein, conserved	Medium	TevSTIB805.6.2720	F	778249	779568	Chr06	NO
Tb927.6.2790	L-threonine 3-dehydrogenase, putative	High	TevSTIB805.6.2880	F	822936	823934	Chr06	NO
Tb927.6.3350	hypothetical protein, conserved	Low	TevSTIB805.6.3440	F	969124	970536	Chr06	NO
Tb927.6.3360	hypothetical protein, conserved	Medium	TevSTIB805.6.3450	F	970872	971363	Chr06	NO
Tb927.6.3420	hypothetical protein, conserved	Low	TevSTIB805.6.3550	R	992706	993755	Chr06	NO
Tb927.6.3600	hypothetical protein, conserved	High	TevSTIB805.6.3730	R	1058953	1060272	Chr06	NO
Tb927.6.3610	hypothetical protein, conserved	Low	TevSTIB805.6.3740	R	1060772	1061809	Chr06	NO
Tb927.6.3740	heat shock 70 kDa protein, mitochondrial precursor, putative	High	TevSTIB805.6.3870	R	1096730	1098698	Chr06	YES
Tb927.6.3930	hypothetical protein, conserved	High	TevSTIB805.6.4060	R	1140682	1141962	Chr06	NO
Tb927.6.4040	hypothetical protein, conserved	High	TevSTIB805.6.4170	R	1162535	1163260	Chr06	NO
Tb927.6.4070	hypothetical protein, conserved	Medium	TevSTIB805.6.4200	R	1166614	1167399	Chr06	NO
Tb927.6.4080	hypothetical protein, conserved	High	TevSTIB805.6.4210	R	1167718	1168335	Chr06	NO
Tb927.6.4130	hypothetical protein, conserved	High	TevSTIB805.6.4260	R	1176250	1176564	Chr06	NO
Tb927.6.4200	hypothetical protein, conserved	High	TevSTIB805.6.4330	R	1188443	1190092	Chr06	NO
Tb927.6.4210	aldehyde dehydrogenase, putative	High	TevSTIB805.6.4340	R	1190380	1192167	Chr06	NO
Tb927.6.4500	hypothetical protein, conserved	Low	TevSTIB805.6.4630	R	1246820	1247431	Chr06	NO
Tb927.6.4510	hypothetical protein, conserved	Low	TevSTIB805.6.4640	R	1247978	1248955	Chr06	NO
Tb927.6.4540	3-hydroxy-3-methylglutaryl-CoA reductase, putative;evidence=Inferred from Sequence Orthology	High	TevSTIB805.6.4670	R	1254032	1255336	Chr06	NO
Tb927.6.4560	hypothetical protein, conserved	High	TevSTIB805.6.4690	R	1259398	1260621	Chr06	NO
Tb927.6.4580	hypothetical protein, conserved	High	TevSTIB805.6.4710	R	1261712	1261996	Chr06	NO
Tb927.6.4700	hypothetical protein, conserved	Low	TevSTIB805.6.4870	F	1292697	1293668	Chr06	NO
Tb927.6.4930	hypothetical protein, conserved	High	TevSTIB805.6.5100	F	1346714	1347457	Chr06	NO
Tb927.6.4990	ATP synthase, epsilon chain, putative	High	TevSTIB805.6.5160	F	1354774	1355322	Chr06	NO
Tb927.7.560	hypothetical protein, conserved	Low	TevSTIB805.7.500	R	110281	112602	Chr07	NO
Tb927.7.590	hypothetical protein, conserved	Low	TevSTIB805.7.530	R	117422	118813	Chr07	NO
Tb927.7.630	hypothetical protein, conserved	mt(IFA)	TevSTIB805.7.570	R	125850	126602	Chr07	NO
Tb927.7.640	hypothetical protein, conserved	High	TevSTIB805.7.580	R	128252	129256	Chr07	NO
Tb927.7.800	hypothetical protein, conserved	High	TevSTIB805.7.750	R	177732	179363	Chr07	NO
Tb927.7.840	hypothetical protein, conserved	High	TevSTIB805.7.790	R	196738	197112	Chr07	NO
Tb927.7.870	hypothetical protein, conserved	Low	TevSTIB805.7.820	R	203187	204278	Chr07	NO
Tb927.7.900	hypothetical protein, conserved	Low	TevSTIB805.7.850	R	206978	208765	Chr07	NO
Tb927.7.910	hypothetical protein, conserved	Medium	TevSTIB805.7.860	R	209274	211415	Chr07	NO
Tb927.7.1000	DNA repair and recombination helicase protein PIF1, putative;evidence=Inferred from Experiment	Low	TevSTIB805.7.970	F	256143	258224	Chr07	NO
Tb927.7.1010	hypothetical protein, conserved	Low	TevSTIB805.7.980	F	258720	259235	Chr07	NO
Tb927.7.1070	RNA-editing complex protein,exonuclease,KREX1	High	TevSTIB805.7.1040	F	268435	271120	Chr07	YES
Tb927.7.1080	hypothetical protein, conserved	Medium	TevSTIB805.7.1050	F	271607	272689	Chr07	NO
Tb927.7.1200	hypothetical protein, conserved	Low	TevSTIB805.7.1190	F	303132	304454	Chr07	NO
Tb927.7.1270	hypothetical protein, conserved	Low	TevSTIB805.7.1260	F	325812	326781	Chr07	YES
Tb927.7.1340	10 kDa heat shock protein, putative	High	TevSTIB805.7.1330	F	339799	340101	Chr07	NO
Tb927.7.1400	hypothetical protein, conserved	Low	TevSTIB805.7.1410	F	350603	352264	Chr07	NO
Tb927.7.1550	RNA-editing complex protein,RNA-editing 3' terminal uridylyl transferase 2,KRET2	High	TevSTIB805.7.1570	F	382714	384012	Chr07	NO
Tb927.7.1570	hypothetical protein, conserved	Low	TevSTIB805.7.1600	F	387409	391608	Chr07	NO
Tb927.7.1640	ras-like small GTPase, putative;evidence=traceable author statement	High	TevSTIB805.7.1670	F	405775	407505	Chr07	NO
Tb927.7.1800	hypothetical protein, conserved	Low	TevSTIB805.7.1830	F	436705	437415	Chr07	NO
Tb927.7.2190	hypothetical protein, conserved	Low	TevSTIB805.7.2260	R	563632	564432	Chr07	NO
Tb927.7.2200	hypothetical protein, conserved	Medium	TevSTIB805.7.2270	R	565618	565854	Chr07	NO
Tb927.7.2220	hypothetical protein, conserved	Low	TevSTIB805.7.2280	R	568918	570927	Chr07	NO
Tb927.7.2230	hypothetical protein, conserved	Low	TevSTIB805.7.2290	R	572417	573553	Chr07	NO
Tb927.7.2390	hypothetical protein, conserved	Medium	TevSTIB805.7.2460	R	609676	612531	Chr07	NO
Tb927.7.2410	hypothetical protein, conserved	Medium	TevSTIB805.7.2480	R	615731	617533	Chr07	NO
Tb927.7.2490	hypothetical protein, conserved	Low	TevSTIB805.7.2570	R	634726	636837	Chr07	NO
Tb927.7.2570	hypothetical protein, conserved	High	TevSTIB805.7.2650	R	655685	657106	Chr07	NO
Tb927.7.2620	hypothetical protein, conserved	High	TevSTIB805.7.2710	R	667229	668113	Chr07	NO
Tb927.7.2630	hypothetical protein, conserved	High	TevSTIB805.7.2720	R	668485	671187	Chr07	NO
Tb927.7.2690	hypothetical protein, conserved	Medium	TevSTIB805.7.2780	R	699575	699937	Chr07	NO
Tb927.7.2760	hypothetical protein, conserved	High	TevSTIB805.7.2870	F	715236	716072	Chr07	NO
Tb927.7.2950	hypothetical protein, conserved	Medium	TevSTIB805.7.3060	F	736373	738385	Chr07	NO
Tb927.7.2990	hypothetical protein, conserved	High	TevSTIB805.7.3100	F	746530	747459	Chr07	NO
Tb927.7.3050	hypothetical protein, conserved	High	TevSTIB805.7.3170	F	765822	769319	Chr07	NO
Tb927.7.3100	hypothetical protein, conserved	Medium	TevSTIB805.7.3240	F	781924	783750	Chr07	NO
Tb927.7.3140	hypothetical protein, conserved	Low	TevSTIB805.7.3280	F	793155	793715	Chr07	NO
Tb927.7.3200	hypothetical protein, conserved	Low	TevSTIB805.7.3350	F	820702	821766	Chr07	NO
Tb927.7.3240	hypothetical protein, conserved	High	TevSTIB805.7.3410	F	830041	830532	Chr07	NO
Tb927.7.3270	hypothetical protein, conserved	Low	TevSTIB805.7.3450	R	836758	839181	Chr07	NO
Tb927.7.3340	hypothetical protein, conserved	Low	TevSTIB805.7.3510	R	868431	869963	Chr07	NO
Tb927.7.3430	cyclophilin-type peptidyl-prolyl cis-trans isomerase, putative	High	TevSTIB805.7.3600	R	885669	886364	Chr07	NO
Tb927.7.3460	hypothetical protein, conserved	High	TevSTIB805.7.3630	R	888696	890045	Chr07	NO
Tb927.7.3470	p22 protein precursor, putative	High	TevSTIB805.7.3640	R	890299	891081	Chr07	NO
Tb927.7.3510	hypothetical protein, conserved	High	TevSTIB805.7.3680	R	902718	904166	Chr07	NO
Tb927.7.3520	hypothetical protein, conserved	Medium	TevSTIB805.7.3690	R	904696	905100	Chr07	NO
Tb927.7.3590	hypothetical protein, conserved	High	TevSTIB805.7.3770	R	931810	932265	Chr07	NO
Tb927.7.3750	TFIIF-stimulated CTD phosphatase, putative	Medium	TevSTIB805.7.3950	R	977410	978006	Chr07	NO
Tb927.7.3770	hypothetical protein, conserved	Medium	TevSTIB805.7.3970	R	981569	983299	Chr07	NO
Tb927.7.3810	hypothetical protein, conserved	Medium	TevSTIB805.7.4010	R	990066	991211	Chr07	NO
Tb927.7.3890	hypothetical protein, conserved	Low	TevSTIB805.7.4110	F	1014706	1015626	Chr07	NO
Tb927.7.3910	hypothetical protein, conserved	High	TevSTIB805.7.4140	F	1017713	1019227	Chr07	NO
Tb927.7.3940	mitochondrial carrier protein, putative,ADP/ATP mitochondrial translocase, putative,adenine nucleotide mitochondrial translocator, putative	High	TevSTIB805.7.4180	F	1027866	1028861	Chr07	NO
Tb927.7.3950	RNA-editing complex protein,RNA-editing 3' terminal uridylyl transferase 1,KRET1	High	TevSTIB805.7.4200	F	1029929	1032859	Chr07	NO
Tb927.7.3960	50S ribosomal protein L16, putative	High	TevSTIB805.7.4210	F	1033280	1033783	Chr07	NO
Tb927.7.3990	mitochondrial DNA polymerase I protein C	High	TevSTIB805.7.4260	F	1046630	1051579	Chr07	NO
Tb927.7.4050	hypothetical protein, conserved	Low	TevSTIB805.7.4330	F	1068156	1070423	Chr07	NO
Tb927.7.4140	hypothetical protein, conserved	High	TevSTIB805.7.4430	F	1099024	1099590	Chr07	NO
Tb927.7.4200	hypothetical protein, conserved	Low	TevSTIB805.7.4520	F	1114245	1115309	Chr07	NO
Tb927.7.4310	hypothetical protein, conserved	Low	TevSTIB805.7.4660	R	1138488	1139921	Chr07	NO
Tb927.7.4320	hypothetical protein, conserved	Low	TevSTIB805.7.4670	R	1140783	1141616	Chr07	NO
Tb927.7.4440	hypothetical protein, conserved	Medium	TevSTIB805.7.4790	R	1173080	1173958	Chr07	NO
Tb927.7.4470	hypothetical protein, conserved	Low	TevSTIB805.7.4820	R	1185132	1185713	Chr07	NO
Tb927.7.4550	60S ribosomal protein-like	High	TevSTIB805.7.4900	R	1204568	1205119	Chr07	NO
Tb927.7.4620	hypothetical protein, conserved	Low	TevSTIB805.7.4970	R	1220862	1221689	Chr07	NO
Tb927.7.4710	hypothetical protein, conserved	High	TevSTIB805.7.5100	R	1247514	1248404	Chr07	NO
Tb927.7.4810	hypothetical protein, conserved	Low	TevSTIB805.7.5200	R	1263402	1264778	Chr07	NO
Tb927.7.4890	hypothetical protein, conserved	Low	TevSTIB805.7.5300	R	1276912	1279473	Chr07	NO
Tb927.7.5110	hypothetical protein, conserved	Medium	TevSTIB805.7.5550	F	1343578	1345287	Chr07	NO
Tb927.7.5130	hypothetical protein, conserved	Low	TevSTIB805.7.5570	F	1347548	1348264	Chr07	NO
Tb927.7.5260	hypothetical protein, conserved	High	TevSTIB805.7.5720	F	1387460	1388041	Chr07	NO
Tb927.7.5280	hypothetical protein, conserved	Medium	TevSTIB805.7.5740	F	1390534	1396563	Chr07	NO
Tb927.7.5320	hypothetical protein, conserved	Low	TevSTIB805.7.5800	F	1407853	1410093	Chr07	NO
Tb927.7.5330	hypothetical protein, conserved	Low	TevSTIB805.7.5810	F	1410790	1413105	Chr07	NO
Tb927.7.5440	hypothetical protein, conserved	Medium	TevSTIB805.7.5960	F	1457385	1463351	Chr07	NO
Tb927.7.5620	hypothetical protein, conserved	Low	TevSTIB805.7.6160	F	1515718	1517007	Chr07	NO
Tb927.7.5630	hypothetical protein, conserved	Low	TevSTIB805.7.6170	F	1517439	1519439	Chr07	NO
Tb927.7.5680	deoxyribose-phosphate aldolase, putative	High	TevSTIB805.7.6230	F	1529513	1530355	Chr07	NO
Tb927.7.5700	hypothetical protein, conserved	Low	TevSTIB805.7.6250	F	1534558	1535776	Chr07	YES
Tb927.7.5820	Monooxygenase, putative	High	TevSTIB805.7.6390	F	1565848	1567395	Chr07	NO
Tb927.7.5990	hypothetical protein, conserved	Low	TevSTIB805.7.6570	F	1606262	1607980	Chr07	NO
Tb927.7.6200	chaperone protein DNAj, putative	High	TevSTIB805.7.6780	R	1671952	1672806	Chr07	NO
Tb927.7.6350	NADH-ubiquinone oxidoreductase, mitochondrial, putative	High	TevSTIB805.7.6930	R	1719272	1720093	Chr07	NO
Tb927.7.6410	hypothetical protein, conserved	Low	TevSTIB805.7.7000	R	1730747	1735117	Chr07	NO
Tb927.7.6800	hypothetical protein, conserved	High	TevSTIB805.7.7450	R	1864514	1865650	Chr07	NO
Tb927.7.6990	hypothetical protein, conserved	High	TevSTIB805.7.7720	R	1981231	1982133	Chr07	NO
Tb927.7.7010	hypothetical protein, conserved	High	TevSTIB805.7.7750	R	1990296	1990760	Chr07	NO
Tb927.7.7080	mitochondrial glycoprotein-like protein	High	TevSTIB805.7.7820	R	2006272	2007390	Chr07	NO
Tb927.7.7330	hypothetical protein, conserved	High	TevSTIB805.7.8060	R	2099356	2100594	Chr07	NO
Tb927.7.7410	oxidoreductase, putative	High	TevSTIB805.7.8140	R	2115304	2116311	Chr07	NO
Tb927.7.7420	ATP synthase alpha chain, mitochondrial precursor,ATP synthase F1, alpha subunit	High	TevSTIB805.7.8150	R	2116760	2118514	Chr07	NO
Tb927.7.7440	hypothetical protein, conserved	High	TevSTIB805.7.8170	R	2120987	2121358	Chr07	NO
Tb927.7.7470	receptor-type adenylate cyclase GRESAG 4, putative	Medium	TevSTIB805.7.8210	R	2131252	2134869	Chr07	NO
Tb927.8.580	hypothetical protein, conserved	High	TevSTIB805.8.480	R	133761	134828	Chr08	NO
Tb927.8.620	RNA-editing complex protein MP42	High	TevSTIB805.8.520	R	144529	145710	Chr08	NO
Tb927.8.630	lipoate-protein ligase, putative,lipoyl ligase, putative,lipoyltransferase, putative,lipoate biosynthesis protein, putative	High	TevSTIB805.8.530	R	146008	147546	Chr08	NO
Tb927.8.680	RNA-editing complex protein	High	TevSTIB805.8.580	R	157690	158199	Chr08	NO
Tb927.8.940	hypothetical protein, conserved	Low	TevSTIB805.8.840	R	258006	264586	Chr08	YES
Tb927.8.1060	malonyl-CoA decarboxylase, mitochondrial precursor, putative	High	TevSTIB805.8.960	R	308827	311052	Chr08	NO
Tb927.8.1240	electron transfer flavoprotein-ubiquinone oxidoreductase, putative	High	TevSTIB805.8.1140	R	360148	361842	Chr08	NO
Tb927.8.1420	acyl-CoA dehydrogenase, mitochondrial precursor, putative	High	TevSTIB805.8.1330	F	435463	437022	Chr08	NO
Tb927.8.1430	hypothetical protein, conserved	High	TevSTIB805.8.1340	F	437264	437764	Chr08	NO
Tb927.8.1490	hypothetical protein, conserved	High	TevSTIB805.8.1400	F	454886	455197	Chr08	NO
Tb927.8.1580	hypothetical protein, conserved	Low	TevSTIB805.8.1510	F	482739	483572	Chr08	NO
Tb927.8.1740	hypothetical protein, conserved	Medium	TevSTIB805.8.1670	R	542702	544465	Chr08	NO
Tb927.8.1770	hypothetical protein, conserved	Medium	TevSTIB805.8.1700	R	548367	549929	Chr08	NO
Tb927.8.1860	pitrilysin-like metalloprotease,metallo-peptidase, Clan ME, Family M16C	High	TevSTIB805.8.1790	R	574444	577536	Chr08	NO
Tb927.8.1880	hypothetical protein, conserved	High	TevSTIB805.8.1810	R	581574	582146	Chr08	NO
Tb927.8.1890	cytochrome c1, heme protein, mitochondrial precursor	High	TevSTIB805.8.1820	R	583266	584042	Chr08	NO
Tb927.8.1990	tryparedoxin peroxidase	High	TevSTIB805.8.1930	F	602806	603486	Chr08	NO
Tb927.8.2290	hypothetical protein, conserved	Low	TevSTIB805.8.2230	F	665445	666104	Chr08	NO
Tb927.8.2300	hypothetical protein, conserved	Low	TevSTIB805.8.2240	F	666531	667196	Chr08	NO
Tb927.8.2460	hypothetical protein, conserved	Low	TevSTIB805.8.2400	F	703174	704028	Chr08	NO
Tb927.8.2470	hypothetical protein, conserved	Medium	TevSTIB805.8.2410	F	705033	705317	Chr08	NO
Tb927.8.2530	hypothetical protein, conserved	High	TevSTIB805.8.2490	F	716658	717002	Chr08	NO
Tb927.8.2540	3-ketoacyl-CoA thiolase, putative	High	TevSTIB805.8.2500	F	717773	719089	Chr08	NO
Tb927.8.2550	hypothetical protein, conserved	Low	TevSTIB805.8.2510	F	719924	721813	Chr08	NO
Tb927.8.2650	hypothetical protein, conserved,metallo-beta-lactamase-like protein, putative	Low	TevSTIB805.8.2620	F	751820	752881	Chr08	NO
Tb927.8.2670	hypothetical protein, conserved	Medium	TevSTIB805.8.2640	F	762837	764123	Chr08	NO
Tb927.8.2680	hypothetical protein, conserved	Low	TevSTIB805.8.2650	F	764428	766389	Chr08	NO
Tb927.8.2740	mitochondrial RNA binding protein	High	TevSTIB805.8.2720	F	778795	779811	Chr08	NO
Tb927.8.2760	hypothetical protein, conserved	High	TevSTIB805.8.2740	F	783788	785221	Chr08	NO
Tb927.8.2880	hypothetical protein, conserved	Medium	TevSTIB805.8.2920	R	840985	844380	Chr08	NO
Tb927.8.3070	hypothetical protein, conserved	Low	TevSTIB805.8.3150	F	891265	891702	Chr08	NO
Tb927.8.3090	hypothetical protein, conserved	Medium	TevSTIB805.8.3170	F	896451	896858	Chr08	NO
Tb927.8.3110	hypothetical protein, conserved	High	TevSTIB805.8.3190	F	900138	901469	Chr08	NO
Tb927.8.3170	hypothetical protein, conserved	High	TevSTIB805.8.3250	F	911019	913379	Chr08	NO
Tb927.8.3260	hypothetical protein, conserved	Low	TevSTIB805.8.3350	F	950445	951032	Chr08	NO
Tb927.8.3300	hypothetical protein, conserved	High	TevSTIB805.8.3390	F	960532	962607	Chr08	NO
Tb927.8.3320	hypothetical protein, conserved	High	TevSTIB805.8.3410	F	965341	966749	Chr08	YES
Tb927.8.3330	mitochondrial carrier protein, putative	High	TevSTIB805.8.3420	F	967026	968048	Chr08	NO
Tb927.8.3450	hypothetical protein, conserved	Low	TevSTIB805.8.3550	F	995847	996269	Chr08	NO
Tb927.8.3580	ATP-dependent chaperone, putative,mitochondrial chaperone BCS1, putative	High	TevSTIB805.8.3680	R	1044620	1046062	Chr08	NO
Tb927.8.3690	isocitrate dehydrogenase [NADP], mitochondrial precursor, putative	High	TevSTIB805.8.3800	R	1072931	1074244	Chr08	NO
Tb927.8.3830	ATP-dependent DEAD/H RNA helicase, putative,mitochondrial	High	TevSTIB805.8.3940	R	1107759	1109996	Chr08	NO
Tb927.8.3960	hypothetical protein, conserved	Low	TevSTIB805.8.4080	R	1151367	1152596	Chr08	NO
Tb927.8.4000	hypothetical protein, conserved	Medium	TevSTIB805.8.4120	R	1159649	1161559	Chr08	NO
Tb927.8.4040	endonuclease G, putative	High	TevSTIB805.8.4160	R	1168096	1169616	Chr08	NO
Tb927.8.4100	hypothetical protein, conserved	Low	TevSTIB805.8.4220	R	1180202	1182454	Chr08	NO
Tb927.8.4150	hypothetical protein, conserved	Low	TevSTIB805.8.4270	R	1188892	1189794	Chr08	NO
Tb927.8.4230	hypothetical protein, conserved	Low	TevSTIB805.8.4360	R	1220177	1223425	Chr08	NO
Tb927.8.4240	hypothetical protein, conserved	Medium	TevSTIB805.8.4370	R	1225035	1230101	Chr08	NO
Tb927.8.4250	hypothetical protein, conserved	High	TevSTIB805.8.4380	R	1230579	1231811	Chr08	NO
Tb927.8.4370	hypothetical protein, conserved	Low	TevSTIB805.8.4510	R	1269654	1272389	Chr08	NO
Tb927.8.4380	hypothetical protein, conserved	Medium	TevSTIB805.8.4520	R	1273631	1273948	Chr08	NO
Tb927.8.4440	mitochondrial carrier protein, putative	High	TevSTIB805.8.4580	R	1284815	1285918	Chr08	NO
Tb927.8.4550	hypothetical protein, conserved	High	TevSTIB805.8.4700	R	1316657	1317208	Chr08	NO
Tb927.8.4690	hypothetical protein, conserved	Low	TevSTIB805.8.4840	R	1343789	1344163	Chr08	NO
Tb927.8.4810	prohibitin 1;evidence=Inferred from Sequence Orthology	High	TevSTIB805.8.4970	R	1388011	1388844	Chr08	NO
Tb927.8.4860	hypothetical protein, conserved	High	TevSTIB805.8.5020	R	1398051	1400090	Chr08	NO
Tb927.8.4920	hypothetical protein, conserved	Low	TevSTIB805.8.5100	F	1424129	1425694	Chr08	NO
Tb927.8.4930	hypothetical protein, conserved	Medium	TevSTIB805.8.5110	F	1426076	1426993	Chr08	NO
Tb927.8.5100	hypothetical protein, conserved	Medium	TevSTIB805.8.5280	F	1476067	1484709	Chr08	NO
Tb927.8.5120	cytochrome c	High	TevSTIB805.8.5300	F	1493984	1494328	Chr08	NO
Tb927.8.5200	hypothetical protein, conserved	High	TevSTIB805.8.5390	F	1516628	1521994	Chr08	NO
Tb927.8.5220	hypothetical protein, conserved	Medium	TevSTIB805.8.5410	F	1526554	1529700	Chr08	NO
Tb927.8.5280	hypothetical protein, conserved	High	TevSTIB805.8.5470	F	1540715	1541488	Chr08	NO
Tb927.8.5310	hypothetical protein, conserved	Low	TevSTIB805.8.5520	F	1548830	1549876	Chr08	NO
Tb927.8.5370	hypothetical protein, conserved	Low	TevSTIB805.8.5590	R	1560422	1561798	Chr08	NO
Tb927.8.5420	hypothetical protein, conserved	Medium	TevSTIB805.8.5650	R	1573069	1574313	Chr08	NO
Tb927.8.5560	hypothetical protein, conserved	High	TevSTIB805.8.5810	F	1605664	1607265	Chr08	NO
Tb927.8.5610	hypothetical protein, conserved	Low	TevSTIB805.8.5870	F	1631955	1633451	Chr08	NO
Tb927.8.5640	hypothetical protein, conserved	High	TevSTIB805.8.5900	F	1642314	1643315	Chr08	NO
Tb927.8.5660	hypothetical protein, conserved	High	TevSTIB805.8.5920	F	1647383	1648039	Chr08	NO
Tb927.8.5690	hypothetical protein, conserved	High	TevSTIB805.8.5950	F	1652001	1653107	Chr08	NO
Tb927.8.5860	50S ribosomal protein L17, putative	High	TevSTIB805.8.6120	F	1696184	1697089	Chr08	NO
Tb927.8.6040	hypothetical protein, conserved	Low	TevSTIB805.8.6300	F	1731081	1731800	Chr08	NO
Tb927.8.6060	2-amino-3-ketobutyrate coenzyme A ligase, putative,glycine acetyltransferase, putative	High	TevSTIB805.8.6320	F	1733352	1734566	Chr08	NO
Tb927.8.6080	hypothetical protein, conserved	High	TevSTIB805.8.6340	F	1741324	1742325	Chr08	NO
Tb927.8.6110	hypothetical protein, conserved	Medium	TevSTIB805.8.6380	F	1752216	1753715	Chr08	NO
Tb927.8.6120	hypothetical protein, conserved	Low	TevSTIB805.8.6400	F	1755026	1755952	Chr08	NO
Tb927.8.6410	short-chain dehydrogenase, putative	High	TevSTIB805.8.6700	F	1825338	1826762	Chr08	NO
Tb927.8.6480	hypothetical protein, conserved	Low	TevSTIB805.8.6770	F	1838053	1839072	Chr08	NO
Tb927.8.6520	hypothetical protein, conserved	Low	TevSTIB805.8.6820	F	1851404	1852708	Chr08	NO
Tb927.8.6560	hypothetical protein, conserved	Medium	TevSTIB805.8.6860	F	1857039	1858160	Chr08	NO
Tb927.8.6580	succinate dehydrogenase flavoprotein, putative	High	TevSTIB805.8.6900	R	1869145	1870974	Chr08	NO
Tb927.8.6640	hypothetical protein, conserved	Medium	TevSTIB805.8.6960	R	1884605	1886416	Chr08	NO
Tb927.8.6800	hypothetical protein, conserved	Medium	TevSTIB805.8.7120	R	1931620	1933377	Chr08	YES
Tb927.8.6820	hypothetical protein, conserved	Low	TevSTIB805.8.7140	R	1935560	1936852	Chr08	NO
Tb927.8.6890	hypothetical protein, conserved	Low	TevSTIB805.8.7210	R	1958545	1958811	Chr08	NO
Tb927.8.6960	hypothetical protein, conserved	High	TevSTIB805.8.7290	F	1972789	1976250	Chr08	NO
Tb927.8.7040	hypothetical protein, conserved	Medium	TevSTIB805.8.7380	F	1989573	1990142	Chr08	NO
Tb927.8.7170	inositol polyphosphate 1-phosphatase, putative	High	TevSTIB805.8.7510	F	2029036	2030208	Chr08	NO
Tb927.8.7260	kinetoplast-associated protein, putative	High	TevSTIB805.8.7620	F	2049137	2052223	Chr08	NO
Tb927.8.7530	3,2-trans-enoyl-CoA isomerase, mitochondrial precursor, putative	High	TevSTIB805.8.7920	F	2130191	2131267	Chr08	NO
Tb927.8.7600	amino acid transporter, putative	High	TevSTIB805.8.7990	F	2155731	2157350	Chr08	NO
Tb927.8.7640	amino acid transporter 1, putative	Medium	TevSTIB805.8.8030	F	2166446	2167849	Chr08	NO
Tb927.8.7670	amino acid transporter, putative	Medium	TevSTIB805.8.8050	F	2172012	2173412	Chr08	NO
Tb927.8.7770	hypothetical protein, conserved	Low	TevSTIB805.8.8240	F	2217926	2219605	Chr08	NO
Tb927.8.8170	hypothetical protein, conserved	High	TevSTIB805.8.8660	F	2375364	2378081	Chr08	NO
Tb927.8.8180	hypothetical protein, conserved	High	TevSTIB805.8.8670	F	2378729	2381528	Chr08	YES
Tb927.9.1380	hypothetical protein, conserved	Medium	TevSTIB805.9.1090	R	273386	274669	Chr09	NO
Tb927.9.1650	hypothetical protein, conserved	Low	TevSTIB805.9.1280	R	311394	312491	Chr09	NO
Tb927.9.1950	hypothetical protein, conserved	High	TevSTIB805.9.1460	R	366765	367988	Chr09	NO
Tb927.9.2110	hypothetical protein, conserved	Low	TevSTIB805.9.1590	R	408450	408791	Chr09	NO
Tb927.9.2270	hypothetical protein, conserved	Medium	TevSTIB805.9.1710	R	435035	437506	Chr09	NO
Tb927.9.2320	hypothetical protein, conserved	Low	TevSTIB805.9.1760	R	442880	443983	Chr09	NO
Tb927.9.2450	electon transport protein SCO1/SCO2, putative	High	TevSTIB805.9.1830	R	454543	455514	Chr09	NO
Tb927.9.2620	hypothetical protein, conserved	Low	TevSTIB805.9.1950	R	507132	509162	Chr09	NO
Tb927.9.3170	cytochrome oxidase subunit V	High	TevSTIB805.9.2330	R	573145	573735	Chr09	NO
Tb927.9.3350	pseudouridylate synthase, putative	High	TevSTIB805.9.2470	F	585038	586258	Chr09	NO
Tb927.9.3410	hypothetical protein, conserved	Medium	TevSTIB805.9.2530	F	595136	595516	Chr09	NO
Tb927.9.3470	low molecular weight protein tyrosine phosphatase, putative	Low	TevSTIB805.9.2560	F	600377	601168	Chr09	NO
Tb927.9.3540	hypothetical protein, conserved	Medium	TevSTIB805.9.2620	F	605625	605978	Chr09	NO
Tb927.9.3600	hypothetical protein, conserved	Medium	TevSTIB805.9.2680	F	612031	612957	Chr09	NO
Tb927.9.3640	hypothetical protein, conserved	High	TevSTIB805.9.2710	F	616879	617475	Chr09	NO
Tb927.9.3770	hypothetical protein, conserved	Low	TevSTIB805.9.2810	F	637843	638505	Chr09	NO
Tb927.9.3780	hypothetical protein, conserved	Medium	TevSTIB805.9.2820	F	638760	639020	Chr09	NO
Tb927.9.4310	tricarboxylate carrier, putative	High	TevSTIB805.9.3150	F	697648	698631	Chr09	NO
Tb927.9.4360	mitochondrial RNA editing ligase 1,RNA-editing complex protein,RNA editing ligase,KREL1	High	TevSTIB805.9.3190	F	704986	706395	Chr09	NO
Tb927.9.4500	heat shock protein, putative,HSP70-like protein	High	TevSTIB805.9.3280	F	721428	723929	Chr09	NO
Tb927.9.4520	mitochondrial processing peptide beta subunit, putative,metallo-peptidase, Clan ME, Family M16	High	TevSTIB805.9.3290	F	724797	726230	Chr09	NO
Tb927.9.4630	hypothetical protein, conserved	Low	TevSTIB805.9.3390	F	740111	744148	Chr09	NO
Tb927.9.4660	hypothetical protein, conserved	Low	TevSTIB805.9.3420	F	749907	751394	Chr09	NO
Tb927.9.4810	hypothetical protein, conserved	Low	TevSTIB805.9.3510	F	759341	760237	Chr09	NO
Tb927.9.5000	hypothetical protein, conserved	Low	TevSTIB805.9.3680	F	787866	788690	Chr09	NO
Tb927.9.5020	hypothetical protein, conserved	Low	TevSTIB805.9.3690	F	788883	790238	Chr09	YES
Tb927.9.5280	hypothetical protein, conserved	High	TevSTIB805.9.3880	F	815189	816013	Chr09	NO
Tb927.9.5330	hypothetical protein, conserved	Low	TevSTIB805.9.3910	F	819723	820865	Chr09	NO
Tb927.9.5590	DNA topoisomerase ii	High	TevSTIB805.9.4110	F	848327	851992	Chr09	NO
Tb927.9.5630	RNA-editing complex protein,KREPB7	High	TevSTIB805.9.4140	F	857540	858775	Chr09	NO
Tb927.9.5890	solanesyl-diphosphate synthase, putative;evidence=Inferred from Sequence Orthology	High	TevSTIB805.9.4280	F	880833	881912	Chr09	NO
Tb927.9.5900	glutamate dehydrogenase	High	TevSTIB805.9.4290	F	882572	885550	Chr09	NO
Tb927.9.5960	succinate dehydrogenase, putative	High	TevSTIB805.9.4320	F	887922	888488	Chr09	NO
Tb927.9.6060	hypothetical protein, conserved	Low	TevSTIB805.9.4370	F	893848	894669	Chr09	NO
Tb927.9.6270	hypothetical protein, conserved	Low	TevSTIB805.9.4490	F	918533	920059	Chr09	NO
Tb927.9.6510	hypothetical protein, conserved	High	TevSTIB805.9.4660	F	956206	958206	Chr09	NO
Tb927.9.6620	hypothetical protein, conserved	Medium	TevSTIB805.9.4740	F	974378	975007	Chr09	NO
Tb927.9.6910	hypothetical protein, conserved	Medium	TevSTIB805.9.4960	F	1017059	1017547	Chr09	NO
Tb927.9.7020	hypothetical protein, conserved	Medium	TevSTIB805.9.5030	F	1025367	1026047	Chr09	NO
Tb927.9.7170	hypothetical protein, conserved	High	TevSTIB805.9.5170	F	1048286	1049701	Chr09	NO
Tb927.9.7190	oxidoreductase, putative	High	TevSTIB805.9.5190	F	1055803	1057140	Chr09	NO
Tb927.9.7200	hypothetical protein, conserved	Low	TevSTIB805.9.5200	F	1057741	1058610	Chr09	NO
Tb927.9.7210	mitochondrial exoribonuclease DSS-1,exoribonuclease DSS-1 (EMBL:AY233297)	High	TevSTIB805.9.5210	F	1058907	1061138	Chr09	NO
Tb927.9.7470	purine nucleoside transporter	Medium	TevSTIB805.9.5400	R	1107812	1109200	Chr09	NO
Tb927.9.7830	hypothetical protein, conserved	High	TevSTIB805.9.5660	R	1164836	1165432	Chr09	NO
Tb927.9.8260	rhomboid-like protein,serine peptidase, Clan S- , family S54, putative	High	TevSTIB805.9.5910	R	1224199	1225188	Chr09	NO
Tb927.9.8290	hypothetical protein, conserved	High	TevSTIB805.9.5920	R	1225754	1226410	Chr09	NO
Tb927.9.8410	chaperone protein DNAj, putative	High	TevSTIB805.9.6020	R	1241492	1242496	Chr09	NO
Tb927.9.8580	hypothetical protein, conserved	Low	TevSTIB805.9.6140	R	1258691	1259083	Chr09	NO
Tb927.9.8710	hypothetical protein, conserved	Low	TevSTIB805.9.6220	R	1273742	1274539	Chr09	NO
Tb927.9.8950	CAAX prenyl protease 1, putative,metallo- peptidase, Clan M- Family M48	High	TevSTIB805.9.6350	R	1307909	1309192	Chr09	NO
Tb927.9.9080	hypothetical protein, conserved	Medium	TevSTIB805.9.6430	R	1319707	1320468	Chr09	NO
Tb927.9.9150	GTP-binding protein, putative	High	TevSTIB805.9.6490	R	1326735	1328090	Chr09	NO
Tb927.9.9310	hypothetical protein, conserved	Medium	TevSTIB805.9.6630	R	1354196	1357096	Chr09	NO
Tb927.9.9420	hypothetical protein, conserved	Low	TevSTIB805.9.6730	R	1375881	1376819	Chr09	NO
Tb927.9.9660	hypothetical protein, conserved	Medium	TevSTIB805.9.6910	R	1408470	1409525	Chr09	NO
Tb927.9.9700	hypothetical protein, conserved	Low	TevSTIB805.9.6940	R	1412588	1413970	Chr09	NO
Tb927.9.9840	glycine cleavage system H protein, putative	High	TevSTIB805.9.7040	R	1430557	1430973	Chr09	NO
Tb927.9.10010	chaperone protein DNAj, putative	High	TevSTIB805.9.7160	R	1453377	1454849	Chr09	NO
Tb927.9.10050	hypothetical protein, conserved	Low	TevSTIB805.9.7180	R	1456665	1457939	Chr09	NO
Tb927.9.10070	hypothetical protein, conserved	High	TevSTIB805.9.7200	R	1459953	1460900	Chr09	NO
Tb927.9.10160	hypothetical protein, conserved	Low	TevSTIB805.9.7260	R	1473243	1473920	Chr09	NO
Tb927.9.10310	mitochondrial carrier protein, putative,mitochondrial phosphate transporter, putative	High	TevSTIB805.9.7360	R	1489542	1490495	Chr09	NO
Tb927.9.10470	hypothetical protein, conserved	Low	TevSTIB805.9.7470	R	1513338	1514558	Chr09	NO
Tb927.9.10500	hypothetical protein, conserved	Medium	TevSTIB805.9.7500	R	1517340	1518929	Chr09	NO
Tb927.9.10520	hypothetical protein, conserved	High	TevSTIB805.9.7520	R	1520719	1521480	Chr09	NO
Tb927.9.10560	hypothetical protein, conserved	Medium	TevSTIB805.9.7560	R	1531375	1531881	Chr09	NO
Tb927.9.10580	3-demethylubiquinone-9 3-methyltransferase, putative	High	TevSTIB805.9.7580	R	1534040	1534906	Chr09	NO
Tb927.9.10630	hypothetical protein, conserved	Low	TevSTIB805.9.7620	R	1538155	1538955	Chr09	NO
Tb927.9.10640	synaptojanin (N-terminal domain), putative	Medium	TevSTIB805.9.7630	R	1540516	1542783	Chr09	NO
Tb927.9.11040	mitochondrial carrier protein, putative	High	TevSTIB805.9.7880	R	1608060	1608983	Chr09	NO
Tb927.9.11120	hypothetical protein, conserved	High	TevSTIB805.9.7940	R	1630962	1632770	Chr09	NO
Tb927.9.11220	hypothetical protein, conserved	Medium	TevSTIB805.9.8040	F	1644800	1645870	Chr09	NO
Tb927.9.11260	nucleoside diphosphate kinase, putative	Medium	TevSTIB805.9.8070	F	1648426	1649430	Chr09	NO
Tb927.9.11280	30S Ribosomal protein S17, putative	High	TevSTIB805.9.8090	F	1652053	1652976	Chr09	NO
Tb927.9.11350	hypothetical protein, conserved	Medium	TevSTIB805.9.8110	F	1655285	1656217	Chr09	NO
Tb927.9.11510	hypothetical protein, conserved	Low	TevSTIB805.9.8200	F	1666633	1667772	Chr09	NO
Tb927.9.11560	hypothetical protein, conserved	Low	TevSTIB805.9.8250	F	1673253	1674230	Chr09	NO
Tb927.9.11880	hypothetical protein, conserved	High	TevSTIB805.9.8510	F	1724638	1725960	Chr09	NO
Tb927.9.11910	hypothetical protein, conserved	Low	TevSTIB805.9.8540	F	1731815	1733176	Chr09	NO
Tb927.9.12120	mitochondrial carrier protein, putative	High	TevSTIB805.9.8700	F	1766691	1767683	Chr09	NO
Tb927.9.12160	hypothetical protein, conserved	Low	TevSTIB805.9.8720	F	1769860	1771638	Chr09	NO
Tb927.9.12500	hypothetical protein, conserved	Low	TevSTIB805.9.8970	F	1826295	1827869	Chr09	NO
Tb927.9.12710	hypothetical protein, conserved	Low	TevSTIB805.9.9110	F	1867960	1869144	Chr09	NO
Tb927.9.12720	hypothetical protein, conserved,predicted zinc finger protein	Low	TevSTIB805.9.9120	F	1869496	1870668	Chr09	NO
Tb927.9.12750	hypothetical protein, conserved	Low	TevSTIB805.9.9150	F	1876160	1877191	Chr09	NO
Tb927.9.12770	hypothetical protein, conserved	Medium	TevSTIB805.9.9170	F	1878641	1881709	Chr09	NO
Tb927.9.12850	hypothetical protein, conserved	High	TevSTIB805.9.9250	F	1900304	1902064	Chr09	NO
Tb927.9.13010	hypothetical protein, conserved	Low	TevSTIB805.9.9350	F	1923436	1925340	Chr09	NO
Tb927.9.13120	hypothetical protein, conserved	Low	TevSTIB805.9.9440	F	1943087	1943833	Chr09	NO
Tb927.9.13130	hypothetical protein, conserved	Low	TevSTIB805.9.9450	F	1944207	1946027	Chr09	NO
Tb927.9.13540	hypothetical protein, conserved	Low	TevSTIB805.9.9810	R	2018395	2019468	Chr09	NO
Tb927.9.13580	hypothetical protein, conserved	High	TevSTIB805.9.9830	R	2023507	2024775	Chr09	NO
Tb927.9.13630	hypothetical protein, conserved	Low	TevSTIB805.9.9880	R	2038977	2040095	Chr09	NO
Tb927.9.13780	hypothetical protein, conserved	High	TevSTIB805.9.9940	R	2045424	2046305	Chr09	NO
Tb927.9.13820	kinetoplastid membrane protein KMP-11	High	TevSTIB805.9.9950	R	2046828	2047106	Chr09	NO
Tb927.9.14050	hypothetical protein, conserved	High	TevSTIB805.9.10030	R	2061229	2062803	Chr09	NO
Tb927.9.14160	reiske iron-sulfur protein , mitochondrial precursor	High	TevSTIB805.9.10120	R	2080112	2081005	Chr09	NO
Tb927.9.14200	hypothetical protein, conserved	High	TevSTIB805.9.10160	R	2090595	2091755	Chr09	NO
Tb927.9.15010	hypothetical protein, conserved	High	TevSTIB805.9.10600	F	2208331	2208945	Chr09	NO
Tb927.9.15240	hypothetical protein, conserved	Low	TevSTIB805.9.10750	F	2230651	2231397	Chr09	NO
Tb927.9.15270	hypothetical protein, conserved	High	TevSTIB805.9.10770	F	2233864	2235471	Chr09	NO
Tb927.9.15380	NADH-ubiquinone oxidoreductase complex I subunit, putative,NDUFA9 subunit, putative	High	TevSTIB805.9.10850	F	2250987	2252108	Chr09	NO
Tb927.10.180	ATP synthase F1 subunit gamma protein, putative	High	TevSTIB805.10.220	F	56484	57398	Chr10	NO
Tb927.10.280	cytochrome oxidase subunit VI	High	TevSTIB805.10.320	F	68146	68622	Chr10	NO
Tb927.10.340	mitochondrial structure specific endonuclease I (SSE-1), putative	High	TevSTIB805.10.380	F	78363	79250	Chr10	NO
Tb927.10.380	hypothetical protein, conserved	High	TevSTIB805.10.420	F	86989	88017	Chr10	NO
Tb927.10.430	hypothetical protein, conserved	Medium	TevSTIB805.10.470	F	98149	99270	Chr10	NO
Tb927.10.470	choline dehydrogenase, putative	High	TevSTIB805.10.510	F	107430	109007	Chr10	NO
Tb927.10.510	hypothetical protein, conserved	Low	TevSTIB805.10.550	F	116330	117325	Chr10	NO
Tb927.10.520	hypothetical protein, conserved	High	TevSTIB805.10.560	F	118294	119484	Chr10	NO
Tb927.10.600	hypothetical protein, conserved	High	TevSTIB805.10.660	F	141955	143580	Chr10	NO
Tb927.10.660	2-oxoisovalerate dehydrogenase alpha subunit, putative	High	TevSTIB805.10.720	F	158802	160052	Chr10	NO
Tb927.10.760	hypothetical protein, conserved	Medium	TevSTIB805.10.820	F	181578	182402	Chr10	NO
Tb927.10.770	hypothetical protein, conserved	Medium	TevSTIB805.10.830	F	183254	185152	Chr10	NO
Tb927.10.900	hypothetical protein, conserved	Low	TevSTIB805.10.990	F	232462	232977	Chr10	NO
Tb927.10.1160	hypothetical protein, conserved	High	TevSTIB805.10.1260	R	294222	294668	Chr10	NO
Tb927.10.1180	hypothetical protein, conserved	Low	TevSTIB805.10.1280	R	301627	303072	Chr10	NO
Tb927.10.1230	hypothetical protein, conserved	Medium	TevSTIB805.10.1340	R	316936	317964	Chr10	NO
Tb927.10.1240	hypothetical protein, conserved	Low	TevSTIB805.10.1350	R	318516	319274	Chr10	NO
Tb927.10.1340	hypothetical protein, conserved	Low	TevSTIB805.10.1450	R	338636	340261	Chr10	NO
Tb927.10.1440	hypothetical protein, conserved	Low	TevSTIB805.10.1550	R	359451	360098	Chr10	NO
Tb927.10.1660	hypothetical protein, conserved	Medium	TevSTIB805.10.1770	R	430415	431302	Chr10	NO
Tb927.10.1730	hypothetical protein, conserved	Low	TevSTIB805.10.1850	F	444927	446000	Chr10	NO
Tb927.10.1870	hypothetical protein, conserved	High	TevSTIB805.10.2010	F	470128	470673	Chr10	NO
Tb927.10.1930	hypothetical protein, conserved	Medium	TevSTIB805.10.2070	F	487562	489505	Chr10	NO
Tb927.10.1950	hypothetical protein, conserved,leucine-rich repeat protein (LRRP), putative	Medium	TevSTIB805.10.2090	F	491815	493950	Chr10	NO
Tb927.10.2050	hypothetical protein, conserved	Low	TevSTIB805.10.2210	F	521064	522302	Chr10	NO
Tb927.10.2070	hypothetical protein, conserved	Low	TevSTIB805.10.2230	F	525969	526568	Chr10	NO
Tb927.10.2230	adrenodoxin reductase, putative,ferredoxin NADP reductase-like protein	High	TevSTIB805.10.2390	F	559045	560847	Chr10	NO
Tb927.10.2300	hypothetical protein, conserved	Medium	TevSTIB805.10.2470	F	580107	580685	Chr10	NO
Tb927.10.2350	pyruvate dehydrogenase complex E3 binding protein, putative	High	TevSTIB805.10.2520	F	588005	588781	Chr10	NO
Tb927.10.2560	mitochondrial malate dehydrogenase;evidence=inferred from sequence orthology	High	TevSTIB805.10.2770	F	646318	647289	Chr10	NO
Tb927.10.2590	hypothetical protein, conserved	Low	TevSTIB805.10.2800	F	653000	655435	Chr10	NO
Tb927.10.2680	hypothetical protein, conserved	Medium	TevSTIB805.10.2900	F	674506	676233	Chr10	NO
Tb927.10.2800	hypothetical protein, conserved	High	TevSTIB805.10.3030	F	703342	703824	Chr10	NO
Tb927.10.2950	hypothetical protein, conserved	Medium	TevSTIB805.10.3190	F	749827	755421	Chr10	YES
Tb927.10.2970	hypothetical protein, conserved	Low	TevSTIB805.10.3210	F	759165	759512	Chr10	NO
Tb927.10.3040	hypothetical protein, conserved	High	TevSTIB805.10.3280	F	778869	779276	Chr10	NO
Tb927.10.3080	methionine biosynthetic protein, putative	High	TevSTIB805.10.3330	F	789088	790272	Chr10	NO
Tb927.10.3120	cytochrome c oxidase assembly protein, putative	High	TevSTIB805.10.3370	F	798546	799244	Chr10	NO
Tb927.10.3210	delta-1-pyrroline-5-carboxylate dehydrogenase, putative	High	TevSTIB805.10.3460	F	814557	816242	Chr10	NO
Tb927.10.3250	hypothetical protein, conserved	High	TevSTIB805.10.3500	F	823048	823971	Chr10	NO
Tb927.10.3320	hypothetical protein, conserved	Medium	TevSTIB805.10.3570	F	838837	840507	Chr10	NO
Tb927.10.3510	hypothetical protein, conserved	Low	TevSTIB805.10.3740	F	886370	891778	Chr10	NO
Tb927.10.3570	RNA-editing complex protein,RNA editing 3' exouridylylase,KREX2	High	TevSTIB805.10.3800	F	907595	910318	Chr10	NO
Tb927.10.3580	hypothetical protein, conserved	High	TevSTIB805.10.3810	F	910709	911683	Chr10	NO
Tb927.10.3590	hypothetical protein, conserved	Medium	TevSTIB805.10.3820	F	911961	913640	Chr10	NO
Tb927.10.3610	hypothetical protein, conserved	Low	TevSTIB805.10.3840	F	918128	919624	Chr10	NO
Tb927.10.3690	rRNA dimethyltransferase, putative	High	TevSTIB805.10.3920	R	943047	944450	Chr10	NO
Tb927.10.3740	hypothetical protein, conserved	Low	TevSTIB805.10.3970	R	954760	956202	Chr10	NO
Tb927.10.3770	hypothetical protein, conserved,predicted TPR repeat protein	Medium	TevSTIB805.10.4000	R	961469	963571	Chr10	NO
Tb927.10.4000	methylglutaconyl-CoA hydratase, mitochondrial precursor, putative	High	TevSTIB805.10.4270	R	1041126	1041959	Chr10	NO
Tb927.10.4080	hypothetical protein, conserved	Medium	TevSTIB805.10.4350	R	1057603	1061154	Chr10	NO
Tb927.10.4130	NADH-ubiquinone oxidoreductase complex I subunit, putative,NDUFA5/B13 subunit, putative	High	TevSTIB805.10.4390	R	1068318	1069115	Chr10	NO
Tb927.10.4220	hypothetical protein, conserved	Low	TevSTIB805.10.4480	F	1092769	1093698	Chr10	NO
Tb927.10.4230	hypothetical protein, conserved	Low	TevSTIB805.10.4490	F	1093975	1094838	Chr10	NO
Tb927.10.4240	hypothetical protein, conserved	High	TevSTIB805.10.4500	F	1095063	1095425	Chr10	NO
Tb927.10.4280	hypothetical protein, conserved	Medium	TevSTIB805.10.4540	F	1099389	1099994	Chr10	NO
Tb927.10.4550	hypothetical protein, conserved	Medium	TevSTIB805.10.4840	R	1145945	1146415	Chr10	NO
Tb927.10.4590	mitochondrial inner membrane signal peptidase, putative,serine peptidase clan SF, family S26B, putative	High	TevSTIB805.10.4880	R	1154113	1154736	Chr10	NO
Tb927.10.4850	hypothetical protein, conserved	Medium	TevSTIB805.10.5140	R	1194565	1195983	Chr10	NO
Tb927.10.4880	hypothetical protein, conserved	High	TevSTIB805.10.5170	R	1200587	1201261	Chr10	NO
Tb927.10.4910	mitochondrial carrier protein, putative	High	TevSTIB805.10.5200	R	1206216	1208330	Chr10	NO
Tb927.10.5010	Mitochondrial elongation factor G, putative	High	TevSTIB805.10.5300	F	1223652	1225892	Chr10	NO
Tb927.10.5050	hypothetical protein, conserved	High	TevSTIB805.10.5340	F	1231901	1232128	Chr10	NO
Tb927.10.5060	hypothetical protein, conserved	Low	TevSTIB805.10.5350	F	1232603	1233169	Chr10	NO
Tb927.10.5120	RNA-editing complex protein,KREPA6	High	TevSTIB805.10.5410	F	1241561	1242055	Chr10	NO
Tb927.10.5220	hypothetical protein, conserved	High	TevSTIB805.10.5520	F	1275712	1277055	Chr10	NO
Tb927.10.5320	RNA editing endoribonuclease,RNA-editing complex protein	High	TevSTIB805.10.5650	F	1313133	1314923	Chr10	NO
Tb927.10.5400	hypothetical protein, conserved	High	TevSTIB805.10.5740	F	1342745	1344469	Chr10	NO
Tb927.10.5440	RNA editing endoribonuclease,RNA-editing complex protein	High	TevSTIB805.10.5780	F	1351492	1353108	Chr10	NO
Tb927.10.5500	hypothetical protein, conserved	High	TevSTIB805.10.5840	F	1362842	1363882	Chr10	NO
Tb927.10.5540	hypothetical protein, conserved	Medium	TevSTIB805.10.5880	F	1373139	1373954	Chr10	NO
Tb927.10.5590	protein phosphatase 2C, putative	High	TevSTIB805.10.5930	F	1380940	1382736	Chr10	NO
Tb927.10.5820	hypothetical protein, conserved,predicted RanGDP binding protein	Medium	TevSTIB805.10.6170	R	1425402	1428413	Chr10	NO
Tb927.10.5830	hypothetical protein, conserved	Low	TevSTIB805.10.6180	R	1428903	1430543	Chr10	NO
Tb927.10.6090	tRNA pseudouridine synthase A, putative	High	TevSTIB805.10.6440	R	1517157	1519223	Chr10	NO
Tb927.10.6170	hypothetical protein, conserved	Medium	TevSTIB805.10.6520	R	1544289	1548815	Chr10	NO
Tb927.10.6200	hypothetical protein, conserved	High	TevSTIB805.10.6550	R	1554675	1554989	Chr10	NO
Tb927.10.6300	hypothetical protein, conserved	High	TevSTIB805.10.6650	R	1575492	1576799	Chr10	NO
Tb927.10.6400	chaperonin Hsp60, mitochondrial precursor	High	TevSTIB805.10.6760	R	1599638	1601326	Chr10	NO
Tb927.10.6730	hypothetical protein, conserved	Medium	TevSTIB805.10.7110	F	1678907	1680379	Chr10	NO
Tb927.10.6850	hypothetical protein, conserved	High	TevSTIB805.10.7230	F	1706737	1707699	Chr10	NO
Tb927.10.7090	alternative oxidase	High	TevSTIB805.10.7530	F	1765389	1766378	Chr10	NO
Tb927.10.7380	hypothetical protein, conserved	High	TevSTIB805.10.7850	R	1846307	1847356	Chr10	NO
Tb927.10.7410	succinyl-CoA ligase [GDP-forming] beta-chain, putative	High	TevSTIB805.10.7880	R	1851487	1852746	Chr10	NO
Tb927.10.7570	dihydrolipoamide acetyltransferase E2 subunit, putative	High	TevSTIB805.10.8040	R	1885051	1886406	Chr10	NO
Tb927.10.7590	hypothetical protein, conserved	Low	TevSTIB805.10.8060	R	1890852	1891691	Chr10	NO
Tb927.10.7610	hypothetical protein, conserved	High	TevSTIB805.10.8080	R	1894328	1898626	Chr10	NO
Tb927.10.7620	mitochondrial ATP-dependent zinc metallopeptidase, putative,metallo-peptidase, Clan MA(E) Family M41	High	TevSTIB805.10.8090	R	1899402	1901375	Chr10	NO
Tb927.10.7870	hypothetical protein, conserved	Low	TevSTIB805.10.8350	R	1948776	1949351	Chr10	NO
Tb927.10.7910	hypothetical protein, conserved	Medium	TevSTIB805.10.8390	R	1959364	1959933	Chr10	NO
Tb927.10.8010	hypothetical protein, conserved	Low	TevSTIB805.10.8500	R	1977746	1978480	Chr10	NO
Tb927.10.8030	hypothetical protein, conserved	High	TevSTIB805.10.8520	R	1982459	1983226	Chr10	NO
Tb927.10.8110	hypothetical protein, conserved	Low	TevSTIB805.10.8600	R	2000266	2001093	Chr10	NO
Tb927.10.8210	RNA-editing complex protein,KREPA2	High	TevSTIB805.10.8700	R	2021049	2022812	Chr10	NO
Tb927.10.8320	cytochrome oxidase subunit IX	High	TevSTIB805.10.8810	R	2038734	2039108	Chr10	NO
Tb927.10.8410	hypothetical protein, conserved	Low	TevSTIB805.10.8920	F	2063593	2064309	Chr10	NO
Tb927.10.8450	glucose transporter,glucose transporter 1E	Medium	TevSTIB805.10.8960	F	2077353	2078936	Chr10	NO
Tb927.10.8610	hypothetical protein, conserved	Medium	TevSTIB805.10.9150	F	2115764	2118421	Chr10	NO
Tb927.10.8630	hypothetical protein, conserved	Medium	TevSTIB805.10.9170	F	2119505	2120368	Chr10	NO
Tb927.10.8730	hypothetical protein, conserved	High	TevSTIB805.10.9270	F	2137541	2138869	Chr10	NO
Tb927.10.8890	kinetoplast DNA-associated protein, putative	High	TevSTIB805.10.9450	F	2180494	2181123	Chr10	NO
Tb927.10.8930	paraflagellar rod component, putative;evidence=traceable author statement	Low	TevSTIB805.10.9490	F	2197077	2199209	Chr10	NO
Tb927.10.8970	kinetoplast DNA-associated protein, putative	High	TevSTIB805.10.9530	F	2207228	2207611	Chr10	NO
Tb927.10.8980	hypothetical protein, conserved	Medium	TevSTIB805.10.9540	F	2208288	2208797	Chr10	NO
Tb927.10.9000	hypothetical protein, conserved	Medium	TevSTIB805.10.9560	F	2211076	2216004	Chr10	NO
Tb927.10.9070	hypothetical protein, conserved	Low	TevSTIB805.10.9630	F	2229762	2231552	Chr10	NO
Tb927.10.9120	hypothetical protein, conserved	High	TevSTIB805.10.9680	F	2241431	2242144	Chr10	NO
Tb927.10.9140	hypothetical protein, conserved	Medium	TevSTIB805.10.9700	F	2245766	2247700	Chr10	NO
Tb927.10.9280	hypothetical protein, conserved	Medium	TevSTIB805.10.9860	F	2278402	2281275	Chr10	NO
Tb927.10.9350	hypothetical protein, conserved	Low	TevSTIB805.10.9930	F	2295092	2297659	Chr10	NO
Tb927.10.9360	hypothetical protein, conserved	Low	TevSTIB805.10.9940	F	2298134	2299696	Chr10	NO
Tb927.10.9390	hypothetical protein, conserved	Low	TevSTIB805.10.9970	F	2304357	2305340	Chr10	NO
Tb927.10.9440	NADH dehydrogenase	High	TevSTIB805.10.10020	F	2312548	2314023	Chr10	NO
Tb927.10.9760	alternative oxidase;evidence=traceable author statement	Low	TevSTIB805.10.10340	F	2398274	2399329	Chr10	NO
Tb927.10.9810	hypothetical protein, conserved	Medium	TevSTIB805.10.10390	F	2408550	2409455	Chr10	NO
Tb927.10.9820	mitochondrial intermediate peptidase, putative,metallo-peptidase, Clan MA(E) Family M3	High	TevSTIB805.10.10400	F	2409783	2411810	Chr10	NO
Tb927.10.9830	hypothetical protein, conserved	Medium	TevSTIB805.10.10410	F	2412308	2412781	Chr10	NO
Tb927.10.9860	hypothetical protein, conserved	Low	TevSTIB805.10.10440	F	2417418	2418680	Chr10	NO
Tb927.10.9970	hypothetical protein, conserved	Medium	TevSTIB805.10.10560	F	2440186	2443260	Chr10	NO
Tb927.10.10120	hypothetical protein, conserved	Medium	TevSTIB805.10.10710	F	2473174	2474898	Chr10	NO
Tb927.10.10130	hypothetical protein, conserved	High	TevSTIB805.10.10720	F	2475202	2476839	Chr10	NO
Tb927.10.10160	hypothetical protein, conserved	Medium	TevSTIB805.10.10750	F	2481014	2482180	Chr10	NO
Tb927.10.10300	hypothetical protein, conserved	Low	TevSTIB805.10.10880	R	2512670	2514451	Chr10	NO
Tb927.10.10310	hypothetical protein, conserved	Low	TevSTIB805.10.10890	R	2514820	2516265	Chr10	NO
Tb927.10.10400	hypothetical protein, conserved	High	TevSTIB805.10.10990	R	2543440	2544420	Chr10	NO
Tb927.10.10420	monothiol glutaredoxin, putative	High	TevSTIB805.10.11010	R	2547191	2547586	Chr10	NO
Tb927.10.10610	protein tyrosine phosphatase, putative	High	TevSTIB805.10.11210	R	2566255	2566944	Chr10	NO
Tb927.10.10780	hypothetical protein, conserved	Medium	TevSTIB805.10.11370	R	2601527	2602171	Chr10	NO
Tb927.10.10820	hypothetical protein, conserved	Low	TevSTIB805.10.11410	R	2608298	2609299	Chr10	NO
Tb927.10.10830	HNRNPA;evidence=Inferred from Experiment	High	TevSTIB805.10.11420	R	2609738	2610700	Chr10	NO
Tb927.10.11030	hypothetical protein, conserved	Medium	TevSTIB805.10.11610	R	2672535	2672837	Chr10	NO
Tb927.10.11050	hypothetical protein, conserved	High	TevSTIB805.10.11630	R	2675988	2676926	Chr10	NO
Tb927.10.11160	HIRA-interacting protein 5, putative	High	TevSTIB805.10.11730	R	2708531	2709262	Chr10	NO
Tb927.10.11190	hypothetical protein, conserved	Low	TevSTIB805.10.11760	R	2718301	2719761	Chr10	NO
Tb927.10.11260	hypothetical protein, conserved	High	TevSTIB805.10.11830	R	2730727	2731290	Chr10	NO
Tb927.10.11340	hypothetical protein, conserved	Low	TevSTIB805.10.11920	F	2744457	2748617	Chr10	NO
Tb927.10.11350	hypothetical protein, conserved	High	TevSTIB805.10.11930	F	2750056	2750457	Chr10	NO
Tb927.10.11420	hypothetical protein, conserved	Low	TevSTIB805.10.12000	F	2760125	2762305	Chr10	NO
Tb927.10.11520	hypothetical protein, conserved	Medium	TevSTIB805.10.12090	F	2789356	2789709	Chr10	NO
Tb927.10.11770	hypothetical protein, conserved	High	TevSTIB805.10.12340	F	2855836	2856225	Chr10	NO
Tb927.10.11820	hypothetical protein, conserved	High	TevSTIB805.10.12380	F	2865927	2866931	Chr10	NO
Tb927.10.11870	hypothetical protein, conserved	Medium	TevSTIB805.10.12420	F	2876872	2877804	Chr10	NO
Tb927.10.11890	hypothetical protein, conserved	Low	TevSTIB805.10.12440	F	2881326	2882276	Chr10	NO
Tb927.10.11900	hypothetical protein, conserved	High	TevSTIB805.10.12450	F	2882869	2883372	Chr10	NO
Tb927.10.12000	hypothetical protein, conserved	High	TevSTIB805.10.12560	F	2898454	2898753	Chr10	NO
Tb927.10.12050	hypothetical protein, conserved	High	TevSTIB805.10.12620	F	2910562	2911431	Chr10	NO
Tb927.10.12180	hypothetical protein, conserved	Low	TevSTIB805.10.12770	F	2945257	2947365	Chr10	NO
Tb927.10.12250	hypothetical protein, conserved	Low	TevSTIB805.10.12850	F	2956273	2958651	Chr10	NO
Tb927.10.12510	P-type H -ATPase, putative	Medium	TevSTIB805.10.13110	R	3013221	3015983	Chr10	NO
Tb927.10.12520	hypothetical protein, conserved	Low	TevSTIB805.10.13120	R	3016411	3018963	Chr10	NO
Tb927.10.12540	electron transfer protein, putative,ferredoxin, putative	High	TevSTIB805.10.13140	R	3020690	3021601	Chr10	NO
Tb927.10.12550	hypothetical protein, conserved	Low	TevSTIB805.10.13150	R	3023585	3024475	Chr10	NO
Tb927.10.12700	pyruvate dehydrogenase E1 alpha subunit, putative	High	TevSTIB805.10.13320	R	3061409	3062545	Chr10	NO
Tb927.10.12840	mitochondrial carrier protein, putative,mitochondrial 2-oxoglutarate/malate carrier protein, putative	High	TevSTIB805.10.13460	R	3098140	3099054	Chr10	NO
Tb927.10.12910	hypothetical protein, conserved	Low	TevSTIB805.10.13540	R	3113593	3116410	Chr10	YES
Tb927.10.13120	mitochondrial carrier protein, putative	High	TevSTIB805.10.13760	R	3170094	3171128	Chr10	NO
Tb927.10.13200	hypothetical protein, conserved	Low	TevSTIB805.10.13840	R	3187771	3190557	Chr10	NO
Tb927.10.13230	hypothetical protein, conserved	Low	TevSTIB805.10.13870	R	3196976	3198346	Chr10	NO
Tb927.10.13300	30S ribosomal protein S8, putative	High	TevSTIB805.10.13940	R	3225687	3226535	Chr10	NO
Tb927.10.13600	hypothetical protein, conserved,hypothetical protein	High	TevSTIB805.10.14290	R	3301505	3301981	Chr10	NO
Tb927.10.13620	NADH-ubiquinone oxidoreductase complex I subunit,FT putative,NDUFA9 subunit, putative	High	TevSTIB805.10.14310	R	3305532	3306989	Chr10	NO
Tb927.10.13770	hypothetical protein, conserved	Low	TevSTIB805.10.14470	R	3337905	3338246	Chr10	NO
Tb927.10.13820	hypothetical protein, conserved	High	TevSTIB805.10.14520	R	3352198	3352983	Chr10	NO
Tb927.10.13830	chaperone protein DNAj, putative	High	TevSTIB805.10.14530	R	3354213	3354935	Chr10	NO
Tb927.10.13850	hypothetical protein, conserved	Medium	TevSTIB805.10.14550	R	3358024	3359166	Chr10	NO
Tb927.10.13990	hypothetical protein, conserved	Low	TevSTIB805.10.14700	R	3383042	3384127	Chr10	NO
Tb927.10.14110	hypothetical protein, conserved	Low	TevSTIB805.10.14840	R	3408729	3409088	Chr10	NO
Tb927.10.14250	hypothetical protein, conserved	Low	TevSTIB805.10.14990	R	3436683	3437552	Chr10	NO
Tb927.10.14280	mitochondrial carrier protein, putative	High	TevSTIB805.10.15030	R	3447756	3448325	Chr10	NO
Tb927.10.14350	hypothetical protein, conserved	Low	TevSTIB805.10.15100	R	3469033	3469326	Chr10	NO
Tb927.10.14590	hypothetical protein, conserved	Low	TevSTIB805.10.15340	R	3551151	3552086	Chr10	NO
Tb927.10.14830	mitochondrial carrier protein, putative,ADP/ATP translocase 1, putative	High	TevSTIB805.10.15590	R	3590895	3591818	Chr10	NO
Tb927.10.14860	hypothetical protein, conserved	High	TevSTIB805.10.15620	F	3601771	3603912	Chr10	NO
Tb927.10.15010	lipoic acid synthetase, mitochondrial precursor, putative	High	TevSTIB805.10.15800	F	3645317	3646546	Chr10	NO
Tb927.10.15420	hypothetical protein, conserved	Low	TevSTIB805.10.16240	F	3765448	3766620	Chr10	NO
Tb927.10.15650	tRNA pseudouridine synthase A-like protein	High	TevSTIB805.10.16480	F	3813383	3815122	Chr10	NO
Tb927.10.15660	hypothetical protein, conserved	Low	TevSTIB805.10.16490	F	3816070	3818409	Chr10	NO
Tb927.10.15710	mitochondrial carrier protein, putative	High	TevSTIB805.10.16540	F	3843312	3844283	Chr10	NO
Tb927.10.15830	hypothetical protein, conserved	Low	TevSTIB805.10.16670	F	3884343	3885143	Chr10	NO
Tb927.10.16090	hypothetical protein, conserved	High	TevSTIB805.10.16950	F	3933142	3935553	Chr10	NO
Tb927.10.16170	potassium voltage-gated channel, putative	High	TevSTIB805.10.17030	F	3949824	3950747	Chr10	NO
Tb927.11.180	electron transfer flavoprotein, putative	High	TevSTIB805.11_01.100	R	39213	40022	Chr11_01	NO
Tb927.11.240	hypothetical protein, conserved	Medium	TevSTIB805.11_01.160	R	50567	53722	Chr11_01	NO
Tb927.11.270	mitochondrial carrier protein, putative	High	TevSTIB805.11_01.190	R	60669	61601	Chr11_01	NO
Tb927.11.480	hypothetical protein, conserved	Low	TevSTIB805.11_01.420	R	106683	107831	Chr11_01	NO
Tb927.11.540	ABC transporter, putative	High	TevSTIB805.11_01.480	R	132862	134937	Chr11_01	NO
Tb927.11.570	hypothetical protein, conserved	Medium	TevSTIB805.11_01.510	R	140898	141461	Chr11_01	NO
Tb927.11.600	hypothetical protein, conserved	High	TevSTIB805.11_01.540	R	144387	144707	Chr11_01	NO
Tb11.03.0300	hypothetical protein, conserved	Medium	TevSTIB805.11_01.850	F	211396	213801	Chr11_01	NO
Tb927.11.870	hypothetical protein, conserved	High	TevSTIB805.11_01.880	F	220000	220740	Chr11_01	NO
Tb927.11.940	RNA-editing complex protein,KREPB5	High	TevSTIB805.11_01.950	F	239202	240356	Chr11_01	NO
Tb927.11.1010	chaperone protein DNAj, putative	High	TevSTIB805.11_01.1020	F	256109	257224	Chr11_01	NO
Tb927.11.1250	hypothetical protein, conserved	High	TevSTIB805.11_01.1240	F	352625	355249	Chr11_01	NO
Tb927.11.1270	hypothetical protein, conserved	High	TevSTIB805.11_01.1260	F	360038	360547	Chr11_01	NO
Tb927.11.1290	hypothetical protein, conserved	Medium	TevSTIB805.11_01.1280	F	367694	368890	Chr11_01	NO
Tb927.11.1320	NADH-ubiquinone oxidoreductase 20 kDa subunit, mitochondrial precursor,NDUFS7 subunit	High	TevSTIB805.11_01.1310	F	373232	373840	Chr11_01	NO
Tb927.11.1350	hypothetical protein, conserved	Low	TevSTIB805.11_01.1340	F	381291	382214	Chr11_01	NO
Tb927.11.1370	glutaredoxin, putative	High	TevSTIB805.11_01.1360	F	386523	386810	Chr11_01	NO
Tb927.11.1400	hypothetical protein, conserved	Medium	TevSTIB805.11_01.1390	F	400873	403410	Chr11_01	NO
Tb927.11.1450	2-oxoglutarate dehydrogenase E1 component, putative	High	TevSTIB805.11_01.1440	F	415591	418617	Chr11_01	NO
Tb927.11.1540	isovaleryl-coA dehydrogenase, putative	High	TevSTIB805.11_01.1530	R	458268	459503	Chr11_01	NO
Tb927.11.1620	hypothetical protein, conserved	Medium	TevSTIB805.11_01.1610	R	477143	477721	Chr11_01	NO
Tb927.11.1630	hypothetical protein, conserved	High	TevSTIB805.11_01.1620	R	478266	480761	Chr11_01	NO
Tb927.11.1650	hypothetical protein, conserved	Low	TevSTIB805.11_01.1640	R	483330	483737	Chr11_01	NO
Tb927.11.1700	hypothetical protein, conserved	Medium	TevSTIB805.11_01.1700	R	493591	495282	Chr11_01	NO
Tb927.11.1710	mitochondrial RNA binding protein 1,gBP21, MRP1	High	TevSTIB805.11_01.1710	R	496048	496668	Chr11_01	NO
Tb927.11.1950	hypothetical protein, conserved	Medium	TevSTIB805.11_01.1980	F	546069	546737	Chr11_01	NO
Tb927.11.2010	hypothetical protein, conserved	High	TevSTIB805.11_01.2040	F	558180	559487	Chr11_01	NO
Tb927.11.2160	hypothetical protein, conserved	Low	TevSTIB805.11_01.2190	F	589729	590193	Chr11_01	NO
Tb927.11.2180	hypothetical protein, conserved	Low	TevSTIB805.11_01.2210	F	592771	594699	Chr11_01	NO
Tb927.11.2190	hypothetical protein, conserved	Low	TevSTIB805.11_01.2220	F	595253	595552	Chr11_01	NO
Tb927.11.2530	hypothetical protein, conserved	High	TevSTIB805.11_01.2600	R	720157	722400	Chr11_01	NO
Tb927.11.2580	hypothetical protein, conserved	Medium	TevSTIB805.11_01.2650	R	731535	732692	Chr11_01	NO
Tb927.11.2650	heat shock protein 84, putative	High	TevSTIB805.11_01.2720	R	752378	754639	Chr11_01	NO
Tb927.11.2690	succinyl-coA:3-ketoacid-coenzyme A transferase, mitochondrial precursor, putative	High	TevSTIB805.11_01.2760	R	765936	767417	Chr11_01	NO
Tb927.11.2720	hypothetical protein, conserved	Low	TevSTIB805.11_01.2790	R	774445	775731	Chr11_01	NO
Tb927.11.2910	hypothetical protein, conserved	Medium	TevSTIB805.11_01.2990	R	827294	828445	Chr11_01	NO
Tb927.11.2920	glycerolphosphate mutase, putative	High	TevSTIB805.11_01.3000	R	828833	829708	Chr11_01	NO
Tb927.11.2990	RNA-editing complex protein,KREPB4	High	TevSTIB805.11_01.3070	R	840689	841933	Chr11_01	NO
Tb927.11.3060	hypothetical protein, conserved	Medium	TevSTIB805.11_01.3140	R	853667	854209	Chr11_01	NO
Tb927.11.3200	hypothetical protein, conserved	Low	TevSTIB805.11_01.3280	R	883074	883925	Chr11_01	YES
Tb927.11.3260	mitochondrial DNA polymerase I protein D, putative	High	TevSTIB805.11_01.3350	F	917604	922493	Chr11_01	NO
Tb927.11.3290	hypothetical protein, conserved	Low	TevSTIB805.11_01.3380	F	931067	935569	Chr11_01	NO
Tb927.11.3530	hypothetical protein, conserved	Low	TevSTIB805.11_01.3650	F	1019091	1019768	Chr11_01	NO
Tb927.11.3640	hypothetical protein, conserved	High	TevSTIB805.11_01.3780	F	1047433	1047990	Chr11_01	NO
Tb927.11.3670	hypothetical protein, conserved	Low	TevSTIB805.11_01.3820	F	1056949	1058322	Chr11_01	NO
Tb927.11.3690	hypothetical protein, conserved	Low	TevSTIB805.11_01.3840	F	1060026	1061153	Chr11_01	NO
Tb927.11.3860	hypothetical protein, conserved	Low	TevSTIB805.11_01.3990	F	1106708	1108063	Chr11_01	NO
Tb927.11.3940	hypothetical protein, conserved	High	TevSTIB805.11_01.4070	F	1129010	1129975	Chr11_01	NO
Tb927.11.3980	mitochondrial processing peptidase alpha subunit, putative,metallo-peptidase, Clan ME, Family M16	High	TevSTIB805.11_01.4110	F	1139390	1140946	Chr11_01	NO
Tb927.11.4270	hypothetical protein, conserved	Low	TevSTIB805.11_01.4380	R	1215328	1216161	Chr11_01	NO
Tb927.11.4320	hypothetical protein, conserved	Medium	TevSTIB805.11_01.4440	R	1225926	1227353	Chr11_01	NO
Tb927.11.4330	hypothetical protein, conserved	Medium	TevSTIB805.11_01.4450	R	1227983	1228552	Chr11_01	NO
Tb927.11.4490	long-chain-fatty acid-CoA ligase protein, putative,acyl-CoA synthetase, putative,fatty acid thiokinase (long chain), putative	High	TevSTIB805.11_01.4620	F	1270105	1272102	Chr11_01	NO
Tb927.11.4630	hypothetical protein, conserved	Low	TevSTIB805.11_01.4780	F	1304629	1305951	Chr11_01	NO
Tb927.11.4650	hypothetical protein, conserved	High	TevSTIB805.11_01.4800	F	1310145	1314711	Chr11_01	YES
Tb927.11.4680	hypothetical protein, conserved	High	TevSTIB805.11_01.4830	F	1320292	1321347	Chr11_01	NO
Tb927.11.4690	mitochondrial DNA polymerase I protein B, putative,DNA polymerase I-like protein B	High	TevSTIB805.11_01.4840	F	1322980	1327194	Chr11_01	NO
Tb927.11.4780	pyruvate dehydrogenase (lipoamide) kinase, putative	High	TevSTIB805.11_01.4960	F	1348740	1350077	Chr11_01	NO
Tb927.11.4810	hypothetical protein, conserved	Medium	TevSTIB805.11_01.4990	F	1356751	1357275	Chr11_01	NO
Tb927.11.4840	hypothetical protein, conserved	Medium	TevSTIB805.11_01.5020	F	1360065	1361225	Chr11_01	NO
Tb927.11.4850	hypothetical protein, conserved	High	TevSTIB805.11_01.5030	F	1363015	1364346	Chr11_01	NO
Tb927.11.4870	hypothetical protein, conserved	High	TevSTIB805.11_01.5050	F	1366485	1367147	Chr11_01	NO
Tb927.11.5050	fumarate hydratase, class I;evidence=inferred from sequence orthology	High	TevSTIB805.11_01.5240	F	1412298	1413965	Chr11_01	NO
Tb927.11.5060	hypothetical protein, conserved	High	TevSTIB805.11_01.5250	F	1415227	1418352	Chr11_01	NO
Tb927.11.5090	aspartate aminotransferase, mitochondrial	High	TevSTIB805.11_01.5280	F	1424721	1425887	Chr11_01	NO
Tb927.11.5280	ATPase subunit 9, putative	High	TevSTIB805.11_01.5470	F	1478313	1478669	Chr11_01	NO
Tb927.11.5290	mitochondrial carrier protein, putative	High	TevSTIB805.11_01.5480	F	1479439	1480287	Chr11_01	NO
Tb927.11.5450	malic enzyme, putative	High	TevSTIB805.11_01.5650	F	1520874	1522589	Chr11_01	NO
Tb927.11.5500	hypothetical protein, conserved	High	TevSTIB805.11_01.5700	F	1533248	1535686	Chr11_01	NO
Tb927.11.5530	hypothetical protein, conserved	High	TevSTIB805.11_01.5730	F	1539558	1540346	Chr11_01	NO
Tb927.11.5600	hypothetical protein, conserved	Medium	TevSTIB805.11_01.5800	F	1556168	1556527	Chr11_01	NO
Tb927.11.5780	mitochondrial DNA-directed RNA polymerase	High	TevSTIB805.11_01.5990	F	1611365	1615189	Chr11_01	NO
Tb927.11.5820	hypothetical protein, conserved	Medium	TevSTIB805.11_01.6030	F	1622247	1623155	Chr11_01	NO
Tb927.11.5880	hypothetical protein, conserved	High	TevSTIB805.11_01.6090	F	1638327	1640000	Chr11_01	NO
Tb927.11.5920	hypothetical protein, conserved	Medium	TevSTIB805.11_01.6130	F	1650260	1652440	Chr11_01	NO
Tb927.11.5940	receptor-type adenylate cyclase GRESAG 4, putative	Medium	TevSTIB805.11_01.6150	R	1656494	1660228	Chr11_01	NO
Tb927.11.5990	hypothetical protein, conserved	High	TevSTIB805.11_01.6200	R	1668415	1670265	Chr11_01	NO
Tb927.11.6000	hypothetical protein, conserved	High	TevSTIB805.11_01.6210	R	1670478	1671533	Chr11_01	NO
Tb927.11.6040	hypothetical protein, conserved	Medium	TevSTIB805.11_01.6250	R	1676325	1678256	Chr11_01	NO
Tb927.11.6250	hypothetical protein, conserved	High	TevSTIB805.11_01.6450	R	1731023	1731832	Chr11_01	NO
Tb927.11.6470	hypothetical protein, conserved	Medium	TevSTIB805.11_01.6670	R	1799678	1800115	Chr11_01	NO
Tb927.11.6570	hypothetical protein, conserved	Medium	TevSTIB805.11_01.6770	R	1818098	1819927	Chr11_01	NO
Tb927.11.6630	3-methylcrotonoyl-CoA carboxylase beta subunit, putative	High	TevSTIB805.11_01.6830	R	1840923	1842761	Chr11_01	NO
Tb927.11.6640	cytochrome b5, putative	High	TevSTIB805.11_01.6840	R	1843505	1843906	Chr11_01	NO
Tb927.11.6660	hypothetical protein, conserved	Medium	TevSTIB805.11_01.6860	R	1850507	1853314	Chr11_01	NO
Tb927.11.6770	hypothetical protein, conserved	Low	TevSTIB805.11_01.6970	R	1881381	1883360	Chr11_01	NO
Tb927.11.6830	hypothetical protein, conserved	Medium	TevSTIB805.11_01.7030	R	1896827	1899730	Chr11_01	NO
Tb927.11.6850	hypothetical protein, conserved	Low	TevSTIB805.11_01.7050	R	1902440	1903162	Chr11_01	NO
Tb927.11.6970	NADH-cytochrome b5 reductase-like protein	High	TevSTIB805.11_01.7170	R	1932454	1933620	Chr11_01	NO
Tb927.11.6980	hypothetical protein, conserved	High	TevSTIB805.11_01.7180	R	1934377	1936200	Chr11_01	NO
Tb927.11.7040	pterin-4-alpha-carbinolamine dehydratase, putative	High	TevSTIB805.11_01.7240	R	1950825	1951199	Chr11_01	NO
Tb927.11.7212	hypothetical protein, conserved	Low	TevSTIB805.11_01.7430	R	1991938	1992849	Chr11_01	NO
Tb927.11.7214	hypothetical protein, conserved	Medium	TevSTIB805.11_01.7460	F	1999167	2000828	Chr11_01	NO
Tb927.11.7250	hypothetical protein, conserved	High	TevSTIB805.11_01.7530	F	2020210	2021700	Chr11_01	NO
Tb927.11.7380	glycerol-3-phosphate dehydrogenase (FAD-dependent), mitochondrial;evidence=Inferred from Sequence Alignment	High	TevSTIB805.11_01.7680	F	2048316	2050127	Chr11_01	NO
Tb927.11.7390	hypothetical protein, conserved	Low	TevSTIB805.11_01.7690	F	2052083	2052970	Chr11_01	NO
Tb11.02.5390	hypothetical protein, conserved	High	TevSTIB805.11_01.7800	F	2073246	2076509	Chr11_01	NO
Tb11.02.5420	NADPH--cytochrome p450 reductase, putative	High	TevSTIB805.11_01.7830	R	2081241	2083136	Chr11_01	NO
Tb927.11.7540	electron-transfer-flavoprotein, alpha polypeptide, putative	High	TevSTIB805.11_01.7950	R	2105101	2106075	Chr11_01	NO
Tb927.11.7560	hypothetical protein, conserved,predicted WD40 repeat protein	Low	TevSTIB805.11_01.7970	R	2109109	2110998	Chr11_01	NO
Tb927.11.7590	hypothetical protein, conserved	Low	TevSTIB805.11_01.8010	R	2119268	2122192	Chr11_01	NO
Tb927.11.7780	hypothetical protein, conserved	High	TevSTIB805.11_01.8090	R	2140359	2141618	Chr11_01	NO
Tb927.11.7790	hypothetical protein, conserved	High	TevSTIB805.11_01.8100	R	2142216	2142782	Chr11_01	NO
Tb927.11.7900	mitochondrial RNA binding protein,RBP16,RNA- binding protein of 16 kDa	High	TevSTIB805.11_01.8220	R	2171759	2172184	Chr11_01	NO
Tb927.11.7920	hypothetical protein, conserved	Low	TevSTIB805.11_01.8230	R	2173253	2174497	Chr11_01	NO
Tb927.11.7960	hypothetical protein, conserved	Medium	TevSTIB805.11_01.8270	R	2179128	2180711	Chr11_01	NO
Tb927.11.8040	hypothetical protein, conserved	High	TevSTIB805.11_01.8350	F	2195985	2196542	Chr11_01	NO
Tb927.11.8430	hypothetical protein, conserved	Low	TevSTIB805.11_01.8750	F	2296603	2297388	Chr11_01	NO
Tb927.11.8700	hypothetical protein, conserved	Low	TevSTIB805.11_01.8920	F	2338479	2340220	Chr11_01	YES
Tb927.11.8800	hypothetical protein, conserved	High	TevSTIB805.11_01.9020	F	2357914	2358747	Chr11_01	NO
Tb927.11.8870	mitochondrial DEAD box protein,KREH1	High	TevSTIB805.11_01.9110	F	2380167	2381807	Chr11_01	NO
Tb927.11.8910	NADH dehydrogenase subunit NB6M, putative;evidence=Inferred from Sequence Orthology	High	TevSTIB805.11_01.9150	F	2385715	2386236	Chr11_01	NO
Tb927.11.8990	cation transporter, putative	High	TevSTIB805.11_01.9230	F	2406865	2408040	Chr11_01	NO
Tb927.11.9140	hypothetical protein, conserved	Medium	TevSTIB805.11_01.9380	F	2443130	2443654	Chr11_01	NO
Tb927.11.9150	hypothetical protein, conserved	Medium	TevSTIB805.11_01.9390	F	2444669	2450128	Chr11_01	NO
Tb927.11.9280	hypothetical protein, conserved	Low	TevSTIB805.11_01.9540	F	2487478	2489481	Chr11_01	NO
Tb927.11.9360	prenyltransferase, putative	High	TevSTIB805.11_01.9620	F	2508599	2510071	Chr11_01	NO
Tb927.11.9390	lipoate-protein ligase, putative,lipoyltransferase, putative	High	TevSTIB805.11_01.9660	R	2515476	2516273	Chr11_01	NO
Tb927.11.9450	cyclophilin type peptidyl-prolyl cis-trans isomerase, putative	High	TevSTIB805.11_01.9740	R	2526846	2527418	Chr11_01	NO
Tb927.11.9570	hypothetical protein, conserved	Low	TevSTIB805.11_01.9860	R	2548067	2548963	Chr11_01	NO
Tb927.11.9600	hypothetical protein, conserved	Low	TevSTIB805.11_01.9890	R	2552539	2553426	Chr11_01	NO
Tb927.11.9670	aminomethyltransferase, putative	High	TevSTIB805.11_01.9970	R	2567225	2568352	Chr11_01	NO
Tb927.11.9750	hypothetical protein, conserved	Medium	TevSTIB805.11_01.10050	R	2576215	2578104	Chr11_01	NO
Tb927.11.9830	hypothetical protein, conserved	High	TevSTIB805.11_01.10130	F	2599350	2599943	Chr11_01	NO
Tb927.11.9900	hypothetical protein, conserved	Low	TevSTIB805.11_01.10200	F	2611225	2612886	Chr11_01	NO
Tb927.11.9930	hypothetical protein, conserved	High	TevSTIB805.11_01.10230	F	2618211	2618981	Chr11_01	NO
Tb927.11.9980	2-oxoglutarate dehydrogenase E1 component, putative	High	TevSTIB805.11_01.10280	F	2625524	2628541	Chr11_01	NO
Tb927.11.10050	hypothetical protein, conserved	High	TevSTIB805.11_01.10360	F	2639652	2639960	Chr11_01	NO
Tb927.11.10080	hypothetical protein, conserved	High	TevSTIB805.11_01.10390	F	2644137	2644706	Chr11_01	NO
Tb927.11.10140	hypothetical protein, conserved	High	TevSTIB805.11_01.10450	F	2654418	2655227	Chr11_01	NO
Tb927.11.10150	hypothetical protein, conserved	High	TevSTIB805.11_01.10460	F	2656120	2659755	Chr11_01	NO
Tb927.11.10170	hypothetical protein, conserved	High	TevSTIB805.11_01.10480	F	2661218	2661859	Chr11_01	NO
Tb927.11.10240	hslVU complex proteolytic subunit, putative,hslVU complex proteolytic subunit, threonine peptidase, Clan T(1), family T1B	High	TevSTIB805.11_01.10550	F	2676991	2677620	Chr11_01	NO
Tb927.11.10390	hypothetical protein, conserved	Low	TevSTIB805.11_01.10700	F	2711498	2713822	Chr11_01	NO
Tb927.11.10400	hypothetical protein, conserved	High	TevSTIB805.11_01.10710	F	2714270	2714809	Chr11_01	NO
Tb927.11.10570	hypothetical protein, conserved	High	TevSTIB805.11_01.10890	F	2755980	2756981	Chr11_01	NO
Tb927.11.10590	hypothetical protein, conserved	Low	TevSTIB805.11_01.10910	F	2760461	2762182	Chr11_01	NO
Tb927.11.10600	hypothetical protein, conserved	Low	TevSTIB805.11_01.10920	F	2762651	2763739	Chr11_01	NO
Tb927.11.10690	hypothetical protein, conserved	Low	TevSTIB805.11_01.11010	F	2798147	2799373	Chr11_01	NO
Tb927.11.10720	hypothetical protein, conserved	Medium	TevSTIB805.11_01.11040	F	2804860	2807616	Chr11_01	NO
Tb927.11.10780	hypothetical protein, conserved	Low	TevSTIB805.11_01.11110	F	2821385	2822224	Chr11_01	NO
Tb927.11.10870	hypothetical protein, conserved	Low	TevSTIB805.11_01.11200	F	2838215	2839066	Chr11_01	NO
Tb927.11.10880	hypothetical protein, conserved	High	TevSTIB805.11_01.11210	F	2840073	2841485	Chr11_01	NO
Tb927.11.10950	hypothetical protein, conserved	Low	TevSTIB805.11_01.11280	F	2859508	2860497	Chr11_01	NO
Tb927.11.10960	hypothetical protein, conserved	Medium	TevSTIB805.11_01.11300	F	2869943	2871895	Chr11_01	NO
Tb927.11.11050	hypothetical protein, conserved	Low	TevSTIB805.11_01.11390	F	2889078	2890082	Chr11_01	NO
Tb927.11.11120	hypothetical protein, conserved	Low	TevSTIB805.11_01.11460	F	2913775	2914371	Chr11_01	NO
Tb927.11.11310	hypothetical protein, conserved	Low	TevSTIB805.11_01.11670	F	2959696	2961192	Chr11_01	NO
Tb927.11.11380	hypothetical protein, conserved	Medium	TevSTIB805.11_01.11740	F	2974111	2975763	Chr11_01	NO
Tb927.11.11460	hypothetical protein, conserved	Medium	TevSTIB805.11_01.11840	F	3004847	3006892	Chr11_01	NO
Tb927.11.11470	hypothetical protein, conserved	High	TevSTIB805.11_01.11850	F	3007868	3008716	Chr11_01	NO
Tb927.11.11620	hypothetical protein, conserved	Medium	TevSTIB805.11_01.11990	F	3048966	3049682	Chr11_01	NO
Tb927.11.11630	hypothetical protein, conserved	High	TevSTIB805.11_01.12000	F	3050491	3051219	Chr11_01	NO
Tb927.11.11680	2-oxoglutarate dehydrogenase E2 component, putative	High	TevSTIB805.11_01.12050	F	3061974	3063125	Chr11_01	NO
Tb927.11.11870	hypothetical protein, conserved	High	TevSTIB805.11_01.12250	F	3107574	3108623	Chr11_01	NO
Tb927.11.11950	cytochrome oxidase assembly protein, putative	High	TevSTIB805.11_01.12320	F	3124644	3125825	Chr11_01	NO
Tb927.11.12040	hypothetical protein, conserved	High	TevSTIB805.11_01.12420	F	3150728	3151207	Chr11_01	NO
Tb927.11.12160	hypothetical protein, conserved	Medium	TevSTIB805.11_01.12550	F	3177758	3178360	Chr11_01	NO
Tb927.11.13140	cytochrome oxidase subunit X	High	TevSTIB805.11_01.13580	R	3452784	3453134	Chr11_01	NO
Tb927.11.13180	hypothetical protein, conserved	High	TevSTIB805.11_01.13630	R	3468905	3470587	Chr11_01	NO
Tb927.11.13230	hypothetical protein, conserved	Low	TevSTIB805.11_01.13680	R	3482252	3482902	Chr11_01	NO
Tb927.11.13280	mitochondrial RNA binding protein 2	High	TevSTIB805.11_01.13730	R	3495079	3495753	Chr11_01	NO
Tb927.11.13290	mitochondrial import inner membrane translocase subunit tim17;evidence=Inferred from Mutant Phenotype	High	TevSTIB805.11_01.13740	R	3496507	3496965	Chr11_01	NO
Tb927.11.13440	mitochondrial carrier protein, putative	High	TevSTIB805.11_01.13890	R	3533039	3533989	Chr11_01	NO
Tb927.11.13510	hypothetical protein, conserved	Medium	TevSTIB805.11_01.13960	R	3546327	3546869	Chr11_01	NO
Tb927.11.13520	hypothetical protein, conserved	Low	TevSTIB805.11_01.13970	R	3548201	3551050	Chr11_01	NO
Tb927.11.13560	hypothetical protein, conserved	Low	TevSTIB805.11_01.14010	R	3557525	3559330	Chr11_01	NO
Tb927.11.13580	ubiquinone biosynthesis protein-like protein	High	TevSTIB805.11_01.14030	R	3560834	3561869	Chr11_01	YES
Tb927.11.13600	hypothetical protein, conserved	Low	TevSTIB805.11_01.14050	R	3563263	3564500	Chr11_01	YES
Tb927.11.13620	hypothetical protein, conserved	Low	TevSTIB805.11_01.14070	R	3565671	3566102	Chr11_01	NO
Tb927.11.13710	hypothetical protein, conserved	Medium	TevSTIB805.11_01.14160	R	3583884	3584521	Chr11_01	YES
Tb927.11.13830	hypothetical protein, conserved	High	TevSTIB805.11_01.14290	F	3613307	3614248	Chr11_01	NO
Tb927.11.13890	hypothetical protein, conserved	Medium	TevSTIB805.11_01.14360	F	3623533	3624339	Chr11_01	NO
Tb927.11.13910	hypothetical protein, conserved	High	TevSTIB805.11_01.14380	F	3625421	3626218	Chr11_01	NO
Tb927.11.14320	hypothetical protein, conserved	Low	TevSTIB805.11_01.14810	F	3740235	3740798	Chr11_01	NO
Tb927.11.14360	mitochondrial carrier protein, putative	High	TevSTIB805.11_01.14850	F	3753759	3754778	Chr11_01	NO
Tb927.11.14380	hypothetical protein, conserved	Low	TevSTIB805.11_01.14870	F	3759063	3760994	Chr11_01	NO
Tb927.11.14570	hypothetical protein, conserved	Low	TevSTIB805.11_01.15060	F	3801163	3802407	Chr11_01	NO
Tb927.11.14660	hypothetical protein, conserved	Low	TevSTIB805.11_01.15180	R	3830706	3831140	Chr11_01	NO
Tb927.11.14700	hypothetical protein, conserved	Medium	TevSTIB805.11_01.15220	R	3842523	3844166	Chr11_01	NO
Tb927.11.14730	metalloprotease, putative,cell division protein FtsH homologue, putative	High	TevSTIB805.11_01.15250	R	3848053	3850086	Chr11_01	NO
Tb927.11.14980	hypothetical protein, conserved	High	TevSTIB805.11_01.15510	R	3918701	3920224	Chr11_01	NO
Tb927.11.15040	chaperonin Hsp60, mitochondrial precursor, putative,heat shock protein 60	High	TevSTIB805.11_01.15570	R	3933428	3935212	Chr11_01	NO
Tb927.11.15070	hypothetical protein, conserved	Medium	TevSTIB805.11_01.15600	R	3939079	3942309	Chr11_01	NO
Tb927.11.15110	hypothetical protein, conserved	Low	TevSTIB805.11_01.15640	R	3950946	3952733	Chr11_01	NO
Tb927.11.15440	hypothetical protein, conserved	High	TevSTIB805.11_01.15970	R	4033631	4034251	Chr11_01	NO
Tb927.11.15470	methionyl-tRNA formyltransferase	High	TevSTIB805.11_01.16000	R	4044931	4046886	Chr11_01	NO
Tb927.11.15500	hypothetical protein, conserved	High	TevSTIB805.11_01.16030	R	4051088	4051939	Chr11_01	NO
Tb927.11.15640	NUDIX hydrolase, conserved	High	TevSTIB805.11_01.16170	R	4080643	4081830	Chr11_01	NO
Tb927.11.15650	poly(A) polymerase, putative	High	TevSTIB805.11_01.16180	R	4082496	4083497	Chr11_01	NO
Tb927.11.15700	hypothetical protein, conserved	Low	TevSTIB805.11_01.16230	R	4091576	4092061	Chr11_01	NO
Tb927.11.15820	superoxide dismutase, putative	High	TevSTIB805.11_01.16370	R	4119674	4120603	Chr11_01	NO
Tb927.11.15850	hypothetical protein, conserved	High	TevSTIB805.11_01.16400	R	4129694	4131958	Chr11_01	NO
Tb927.11.15890	hypothetical protein, conserved	Low	TevSTIB805.11_01.16440	R	4139714	4142823	Chr11_01	YES
Tb927.11.16220	hypothetical protein, conserved	Medium	TevSTIB805.11_01.16780	R	4226403	4226966	Chr11_01	NO
Tb927.11.16400	kinetoplast DNA-associated protein, putative	High	TevSTIB805.11_01.16980	R	4284689	4285663	Chr11_01	NO
Tb927.11.16420	hypothetical protein, conserved	Low	TevSTIB805.11_01.17000	R	4288591	4289484	Chr11_01	NO
Tb927.11.16480	enoyl-CoA hydratase/isomerase family protein, putative	High	TevSTIB805.11_01.17060	R	4302340	4303428	Chr11_01	NO
Tb927.11.16510	hypothetical protein, conserved	Medium	TevSTIB805.11_01.17090	R	4308508	4308948	Chr11_01	NO
Tb927.11.16530	hypothetical protein, conserved	Medium	TevSTIB805.11_01.17110	R	4310662	4313868	Chr11_01	NO
Tb927.11.16700	hypothetical protein, conserved	Low	TevSTIB805.11_01.17280	R	4374572	4377463	Chr11_01	NO
Tb927.11.16710	hypothetical protein, conserved	Low	TevSTIB805.11_01.17290	R	4378159	4378515	Chr11_01	NO
Tb927.11.16730	dihydrolipoyl dehydrogenase	High	TevSTIB805.11_01.17310	R	4385551	4386984	Chr11_01	NO
Tb927.11.16750	hypothetical protein, conserved	Medium	TevSTIB805.11_01.17330	R	4389777	4390481	Chr11_01	NO
Tb927.11.16860	hypothetical protein, conserved	High	TevSTIB805.11_01.17440	R	4424884	4426665	Chr11_01	NO
Tb927.11.16870	NADH dehydrogenase subunit NI8M, putative;evidence=Inferred from Sequence Alignment	High	TevSTIB805.11_01.17450	R	4426989	4427486	Chr11_01	NO
Tb927.11.16990	hypothetical protein, conserved	High	TevSTIB805.11_01.17570	R	4461803	4463770	Chr11_01	NO
Coding sequences found after additional examination (see comments)
Tb GeneID	former GeneID	Tb GeneDB Annotation	Mito Assignment Confidence	T. evansi Location					Comments
Tb06.3A7.270	Tb06.3A7.270	hypothetical protein, conserved	Low	Chr6:388,273-384866 (lies within TevSTIB805.6.990)					Tb06.3A7.270 and Tb927.6.920 were fused in T. evansi CDS TevSTIB805.6.990; frameshift stop codon between Tb06.3A7.270 and Tb927.6.920 in original Tb927_v4 not seen in Tb927dn resequencing
Tb927.10.11500	Tb10.26.0410	hypothetical protein, conserved	Low	Chr10:2,785,021-2,785,668 (lies within TevSTIB805.10.12070)					Complete coding sequence lies within predicted TevSTIB805.10.12070
Not Available	Tb10.v4.0045	prohibitin, putative,chrX additional, unordered contigs	High	TevSTIB805.10.4590					T. brucei sequence appears to be duplicated, with T. evansi homolog to similar sequence Tb927.10.4310 identified
Not Available	Tb10.v4.0053	hypothetical protein,chrX additional, unordered contigs	Medium	TevSTIB805.10.10860 or TevSTIB805.10.10950					T. brucei sequence appears to be duplicated, withT. evansi homologs to similar sequences Tb927.10.10280 and Tb927.10.10360 identified
Not Available	Tb11.0320	hypothetical protein,chrXI additional, unordered contigs	Low	TevSTIB805dn contig 2965					The T. evansi CDS is present in TevSTIB805dn contig 2965. TevSTIB805dn contig 2965 is homologous to Tb927 contig tryp_XI-1036e06.p1k
Not Available	Tb11.0400	hypothetical protein,chrXI additional, unordered contigs	High	TevSTIB805dn contig 2965					The T. evansi CDS is present in TevSTIB805dn contig 2965. TevSTIB805dn contig 2965 is homologous to Tb927 contig tryp_XI-1036e06.p1k
Tb11.39.0010	Tb11.1370	hypothetical protein,chrXI additional, unordered contigs	Low	TevSTIB805.11_01.1860					T. brucei reference GeneID Tb11.1370 refers to outdated tryp_XI_476g10.q2k4126 unordered contig that is now part of Tb927_11_01_v4. Tb11.1370 and Tb11.39.0010 are the same CDS
Tb927.8.6970	Tb927.8.6970	3-methylcrotonyl-CoA carboxylase alpha subunit, putative	High	Chr8:1,974,214-1,976,250 (lies within TevSTIB805.8.7290)					Tb927.6.6960 and Tb927.8.6970 were fused in T. evansi CDS TevSTIB805.8.7290

## Sheet: Unambiguous Orthologs for Ka Ks
List of unambiguous orthologus CDS pairs used in Ka/Ks analysis
non-VSG non-mitoproteome (6331 CDS)		Mitoproteome (942 CDS)		kDNA expression (208 CDS)
Tb GeneID	T. evansi Ortholog	Tb GeneID	T. evansi Ortholog	Tb GeneID	T. evansi Ortholog
Tb05.30F7.410	TevSTIB805.5.770	Tb11.02.5390	TevSTIB805.11_01.7800	Tb11.02.5390	TevSTIB805.11_01.7800
Tb05.5K5.110	TevSTIB805.5.5010	Tb11.v5.0465	TevSTIB805.10.16480	Tb11.v5.0465	TevSTIB805.10.16480
Tb05.5K5.190	TevSTIB805.5.5130	Tb927.1.1160	TevSTIB805.1.1110	Tb927.1.1160	TevSTIB805.1.1110
Tb05.5K5.210	TevSTIB805.5.5150	Tb927.1.1200	TevSTIB805.1.1140	Tb927.1.1200	TevSTIB805.1.1140
Tb06.3A7.960	TevSTIB805.6.1370	Tb927.1.1690	TevSTIB805.1.1620	Tb927.1.1690	TevSTIB805.1.1620
Tb07.26A24.210	TevSTIB805.7.5280	Tb927.1.2990	TevSTIB805.1.2890	Tb927.1.2990	TevSTIB805.1.2890
Tb07.30D13.160	TevSTIB805.7.8300	Tb927.1.3030	TevSTIB805.1.2930	Tb927.1.3030	TevSTIB805.1.2930
Tb09.v4.0015	TevSTIB805.9.11220	Tb927.1.4010	TevSTIB805.1.3910	Tb927.1.4010	TevSTIB805.1.3910
Tb09.v4.0110	TevSTIB805.9.11210	Tb927.10.10130	TevSTIB805.10.10720	Tb927.10.10130	TevSTIB805.10.10720
Tb09.v4.0153	TevSTIB805.8.8730	Tb927.10.10400	TevSTIB805.10.10990	Tb927.10.10400	TevSTIB805.10.10990
Tb10.v4.0039	TevSTIB805.10.4780	Tb927.10.11050	TevSTIB805.10.11630	Tb927.10.11050	TevSTIB805.10.11630
Tb10.v4.0040	TevSTIB805.10.4790	Tb927.10.11260	TevSTIB805.10.11830	Tb927.10.11260	TevSTIB805.10.11830
Tb10.v4.0041	TevSTIB805.10.4800	Tb927.10.11350	TevSTIB805.10.11930	Tb927.10.11350	TevSTIB805.10.11930
Tb10.v4.0042	TevSTIB805.10.4630	Tb927.10.11820	TevSTIB805.10.12380	Tb927.10.11820	TevSTIB805.10.12380
Tb10.v4.0049	TevSTIB805.9.11760	Tb927.10.11870	TevSTIB805.10.12420	Tb927.10.11870	TevSTIB805.10.12420
Tb10.v4.0050	TevSTIB805.10.17490	Tb927.10.12050	TevSTIB805.10.12620	Tb927.10.12050	TevSTIB805.10.12620
Tb10.v4.0220	TevSTIB805.5.250	Tb927.10.13300	TevSTIB805.10.13940	Tb927.10.13300	TevSTIB805.10.13940
Tb10.v4.0221	TevSTIB805.10.140	Tb927.10.13820	TevSTIB805.10.14520	Tb927.10.13820	TevSTIB805.10.14520
Tb10.v4.0259	TevSTIB805.5.5360	Tb927.10.16090	TevSTIB805.10.16950	Tb927.10.16090	TevSTIB805.10.16950
Tb11.01.1680.v5	TevSTIB805.11_01.10220	Tb927.10.1870	TevSTIB805.10.2010	Tb927.10.1870	TevSTIB805.10.2010
Tb11.01.2730	TevSTIB805.11_01.11290	Tb927.10.1900	TevSTIB805.10.2040	Tb927.10.1900	TevSTIB805.10.2040
Tb11.01.6240	TevSTIB805.11_01.15120	Tb927.10.2800	TevSTIB805.10.3030	Tb927.10.2800	TevSTIB805.10.3030
Tb11.02.5090	TevSTIB805.11_01.7450	Tb927.10.3250	TevSTIB805.10.3500	Tb927.10.3250	TevSTIB805.10.3500
Tb11.02.5105	TevSTIB805.11_01.7470	Tb927.10.340	TevSTIB805.10.380	Tb927.10.340	TevSTIB805.10.380
Tb11.02.5360	TevSTIB805.11_01.7770	Tb927.10.3570	TevSTIB805.10.3800	Tb927.10.3570	TevSTIB805.10.3800
Tb11.02.5370	TevSTIB805.11_01.7780	Tb927.10.3580	TevSTIB805.10.3810	Tb927.10.3580	TevSTIB805.10.3810
Tb11.02.5380	TevSTIB805.11_01.7790	Tb927.10.3690	TevSTIB805.10.3920	Tb927.10.3690	TevSTIB805.10.3920
Tb11.02.5400	TevSTIB805.11_01.7810	Tb927.10.380	TevSTIB805.10.420	Tb927.10.380	TevSTIB805.10.420
Tb11.02.5410	TevSTIB805.11_01.7820	Tb927.10.5110	TevSTIB805.10.5400	Tb927.10.5110	TevSTIB805.10.5400
Tb11.02.5430	TevSTIB805.11_01.7840	Tb927.10.5440	TevSTIB805.10.5780	Tb927.10.5440	TevSTIB805.10.5780
Tb11.02.5440	TevSTIB805.11_01.7850	Tb927.10.600	TevSTIB805.10.660	Tb927.10.600	TevSTIB805.10.660
Tb11.0730	TevSTIB805.11_02.600	Tb927.10.6060	TevSTIB805.10.6410	Tb927.10.6060	TevSTIB805.10.6410
Tb11.0740	TevSTIB805.11_02.590	Tb927.10.6070	TevSTIB805.10.6420	Tb927.10.6070	TevSTIB805.10.6420
Tb11.1220	TevSTIB805.10.16050	Tb927.10.6090	TevSTIB805.10.6440	Tb927.10.6090	TevSTIB805.10.6440
Tb11.1390	TevSTIB805.11_01.1840	Tb927.10.6300	TevSTIB805.10.6650	Tb927.10.6300	TevSTIB805.10.6650
Tb11.15.0005	TevSTIB805.11_03.620	Tb927.10.6850	TevSTIB805.10.7230	Tb927.10.6850	TevSTIB805.10.7230
Tb11.1770	TevSTIB805.4.3870	Tb927.10.7380	TevSTIB805.10.7850	Tb927.10.7380	TevSTIB805.10.7850
Tb11.v5.0149	TevSTIB805.7.4990	Tb927.10.8210	TevSTIB805.10.8700	Tb927.10.8210	TevSTIB805.10.8700
Tb11.v5.0154	TevSTIB805.7.5080	Tb927.10.8890	TevSTIB805.10.9450	Tb927.10.8890	TevSTIB805.10.9450
Tb11.v5.0162	TevSTIB805.7.5180	Tb927.10.8950	TevSTIB805.10.9510	Tb927.10.8950	TevSTIB805.10.9510
Tb11.v5.0174	TevSTIB805.7.5350	Tb927.10.8970	TevSTIB805.10.9530	Tb927.10.8970	TevSTIB805.10.9530
Tb11.v5.0176	TevSTIB805.7.5370	Tb927.10.8980	TevSTIB805.10.9540	Tb927.10.8980	TevSTIB805.10.9540
Tb11.v5.0225	TevSTIB805.5.400	Tb927.10.900	TevSTIB805.10.990	Tb927.10.900	TevSTIB805.10.990
Tb11.v5.0230	TevSTIB805.5.360	Tb927.11.10050	TevSTIB805.11_01.10360	Tb927.11.10050	TevSTIB805.11_01.10360
Tb11.v5.0282	TevSTIB805.5.330	Tb927.11.10080	TevSTIB805.11_01.10390	Tb927.11.10080	TevSTIB805.11_01.10390
Tb11.v5.0289	TevSTIB805.11_01.13180	Tb927.11.10150	TevSTIB805.11_01.10460	Tb927.11.10150	TevSTIB805.11_01.10460
Tb11.v5.0303	TevSTIB805.10.16770	Tb927.11.10170	TevSTIB805.11_01.10480	Tb927.11.10170	TevSTIB805.11_01.10480
Tb11.v5.0359	TevSTIB805.10.16620	Tb927.11.10400	TevSTIB805.11_01.10710	Tb927.11.10400	TevSTIB805.11_01.10710
Tb11.v5.0422	TevSTIB805.10.4890	Tb927.11.10570	TevSTIB805.11_01.10890	Tb927.11.10570	TevSTIB805.11_01.10890
Tb11.v5.0453	TevSTIB805.10.9310	Tb927.11.11470	TevSTIB805.11_01.11850	Tb927.11.11470	TevSTIB805.11_01.11850
Tb11.v5.0480	TevSTIB805.10.16180	Tb927.11.11630	TevSTIB805.11_01.12000	Tb927.11.11630	TevSTIB805.11_01.12000
Tb11.v5.0487	TevSTIB805.10.1300	Tb927.11.11870	TevSTIB805.11_01.12250	Tb927.11.11870	TevSTIB805.11_01.12250
Tb11.v5.0507	TevSTIB805.10.16300	Tb927.11.1250	TevSTIB805.11_01.1240	Tb927.11.1250	TevSTIB805.11_01.1240
Tb11.v5.0522	TevSTIB805.9.10830	Tb927.11.13280	TevSTIB805.11_01.13730	Tb927.11.13280	TevSTIB805.11_01.13730
Tb11.v5.0564	TevSTIB805.10.390	Tb927.11.14790	TevSTIB805.11_01.15320	Tb927.11.14790	TevSTIB805.11_01.15320
Tb11.v5.0570	TevSTIB805.7.6960	Tb927.11.14980	TevSTIB805.11_01.15510	Tb927.11.14980	TevSTIB805.11_01.15510
Tb11.v5.0601	TevSTIB805.8.1570	Tb927.11.15470	TevSTIB805.11_01.16000	Tb927.11.15470	TevSTIB805.11_01.16000
Tb11.v5.0638	TevSTIB805.10.1140	Tb927.11.15500	TevSTIB805.11_01.16030	Tb927.11.15500	TevSTIB805.11_01.16030
Tb11.v5.0677	TevSTIB805.11_01.15130	Tb927.11.15640	TevSTIB805.11_01.16170	Tb927.11.15640	TevSTIB805.11_01.16170
Tb11.v5.0700	TevSTIB805.4.720	Tb927.11.15850	TevSTIB805.11_01.16400	Tb927.11.15850	TevSTIB805.11_01.16400
Tb11.v5.0716	TevSTIB805.11_01.15240	Tb927.11.1630	TevSTIB805.11_01.1620	Tb927.11.1630	TevSTIB805.11_01.1620
Tb11.v5.0746	TevSTIB805.11_01.6300	Tb927.11.16400	TevSTIB805.11_01.16980	Tb927.11.16400	TevSTIB805.11_01.16980
Tb11.v5.0831	TevSTIB805.3.3480	Tb927.11.16860	TevSTIB805.11_01.17440	Tb927.11.16860	TevSTIB805.11_01.17440
Tb11.v5.0852	TevSTIB805.5.1680	Tb927.11.16990	TevSTIB805.11_01.17570	Tb927.11.16990	TevSTIB805.11_01.17570
Tb11.v5.0975	TevSTIB805.10.17270	Tb927.11.1710	TevSTIB805.11_01.1710	Tb927.11.1710	TevSTIB805.11_01.1710
Tb11.v5.0991	TevSTIB805.11_01.1790	Tb927.11.2530	TevSTIB805.11_01.2600	Tb927.11.2530	TevSTIB805.11_01.2600
Tb11.v5.1026	TevSTIB805.11_01.15090	Tb927.11.2990	TevSTIB805.11_01.3070	Tb927.11.2990	TevSTIB805.11_01.3070
Tb11.v5.1050	TevSTIB805.11_01.8880	Tb927.11.3260	TevSTIB805.11_01.3350	Tb927.11.3260	TevSTIB805.11_01.3350
Tb927.1.1000	TevSTIB805.1.950	Tb927.11.3290	TevSTIB805.11_01.3380	Tb927.11.3290	TevSTIB805.11_01.3380
Tb927.1.1010	TevSTIB805.1.960	Tb927.11.3640	TevSTIB805.11_01.3780	Tb927.11.3640	TevSTIB805.11_01.3780
Tb927.1.1020	TevSTIB805.1.970	Tb927.11.5060	TevSTIB805.11_01.5250	Tb927.11.5060	TevSTIB805.11_01.5250
Tb927.1.1030	TevSTIB805.1.980	Tb927.11.5500	TevSTIB805.11_01.5700	Tb927.11.5500	TevSTIB805.11_01.5700
Tb927.1.1050	TevSTIB805.1.1000	Tb927.11.5530	TevSTIB805.11_01.5730	Tb927.11.5530	TevSTIB805.11_01.5730
Tb927.1.1060	TevSTIB805.1.1010	Tb927.11.5780	TevSTIB805.11_01.5990	Tb927.11.5780	TevSTIB805.11_01.5990
Tb927.1.1080	TevSTIB805.1.1030	Tb927.11.5990	TevSTIB805.11_01.6200	Tb927.11.5990	TevSTIB805.11_01.6200
Tb927.1.1090	TevSTIB805.1.1040	Tb927.11.6000	TevSTIB805.11_01.6210	Tb927.11.6000	TevSTIB805.11_01.6210
Tb927.1.1100	TevSTIB805.1.1050	Tb927.11.6900	TevSTIB805.11_01.7100	Tb927.11.6900	TevSTIB805.11_01.7100
Tb927.1.1110	TevSTIB805.1.1060	Tb927.11.7218	TevSTIB805.11_01.7490	Tb927.11.7218	TevSTIB805.11_01.7490
Tb927.1.1120	TevSTIB805.1.1070	Tb927.11.7790	TevSTIB805.11_01.8100	Tb927.11.7790	TevSTIB805.11_01.8100
Tb927.1.1140	TevSTIB805.1.1090	Tb927.11.7900	TevSTIB805.11_01.8220	Tb927.11.7900	TevSTIB805.11_01.8220
Tb927.1.1150	TevSTIB805.1.1100	Tb927.11.7960	TevSTIB805.11_01.8270	Tb927.11.7960	TevSTIB805.11_01.8270
Tb927.1.1170	TevSTIB805.1.1120	Tb927.11.8040	TevSTIB805.11_01.8350	Tb927.11.8040	TevSTIB805.11_01.8350
Tb927.1.1180	TevSTIB805.1.1130	Tb927.11.870	TevSTIB805.11_01.880	Tb927.11.870	TevSTIB805.11_01.880
Tb927.1.120	TevSTIB805.1.140	Tb927.11.8870	TevSTIB805.11_01.9110	Tb927.11.8870	TevSTIB805.11_01.9110
Tb927.1.1220	TevSTIB805.1.1160	Tb927.11.9140	TevSTIB805.11_01.9380	Tb927.11.9140	TevSTIB805.11_01.9380
Tb927.1.1230	TevSTIB805.1.1170	Tb927.11.940	TevSTIB805.11_01.950	Tb927.11.940	TevSTIB805.11_01.950
Tb927.1.1240	TevSTIB805.1.1180	Tb927.11.9450	TevSTIB805.11_01.9740	Tb927.11.9450	TevSTIB805.11_01.9740
Tb927.1.1250	TevSTIB805.1.1190	Tb927.11.9830	TevSTIB805.11_01.10130	Tb927.11.9830	TevSTIB805.11_01.10130
Tb927.1.1260	TevSTIB805.1.1200	Tb927.2.1860	TevSTIB805.2.1010	Tb927.2.1860	TevSTIB805.2.1010
Tb927.1.1270	TevSTIB805.1.1210	Tb927.2.3800	TevSTIB805.2.2000	Tb927.2.3800	TevSTIB805.2.2000
Tb927.1.1280	TevSTIB805.1.1220	Tb927.2.4400	TevSTIB805.2.2290	Tb927.2.4400	TevSTIB805.2.2290
Tb927.1.1300	TevSTIB805.1.1240	Tb927.2.4890	TevSTIB805.2.2640	Tb927.2.4890	TevSTIB805.2.2640
Tb927.1.1310	TevSTIB805.1.1250	Tb927.2.6070	TevSTIB805.2.3440	Tb927.2.6070	TevSTIB805.2.3440
Tb927.1.1320	TevSTIB805.1.1260	Tb927.2.6100	TevSTIB805.2.3470	Tb927.2.6100	TevSTIB805.2.3470
Tb927.1.1340	TevSTIB805.1.1280	Tb927.3.1180	TevSTIB805.3.1150	Tb927.3.1180	TevSTIB805.3.1150
Tb927.1.1350	TevSTIB805.1.1290	Tb927.3.1590	TevSTIB805.3.1580	Tb927.3.1590	TevSTIB805.3.1580
Tb927.1.1370	TevSTIB805.1.1310	Tb927.3.1710	TevSTIB805.3.1720	Tb927.3.1710	TevSTIB805.3.1720
Tb927.1.1380	TevSTIB805.1.1320	Tb927.3.1820	TevSTIB805.3.1830	Tb927.3.1820	TevSTIB805.3.1830
Tb927.1.1400	TevSTIB805.1.1340	Tb927.3.2260	TevSTIB805.3.2280	Tb927.3.2260	TevSTIB805.3.2280
Tb927.1.1420	TevSTIB805.1.1360	Tb927.3.5240	TevSTIB805.3.5530	Tb927.3.5240	TevSTIB805.3.5530
Tb927.1.1440	TevSTIB805.1.1380	Tb927.3.5610	TevSTIB805.3.5910	Tb927.3.5610	TevSTIB805.3.5910
Tb927.1.1450	TevSTIB805.1.1390	Tb927.3.770	TevSTIB805.3.700	Tb927.3.770	TevSTIB805.3.700
Tb927.1.1470	TevSTIB805.1.1410	Tb927.3.820	TevSTIB805.3.750	Tb927.3.820	TevSTIB805.3.750
Tb927.1.1500	TevSTIB805.1.1430	Tb927.3.860	TevSTIB805.3.790	Tb927.3.860	TevSTIB805.3.790
Tb927.1.1530	TevSTIB805.1.1460	Tb927.3.970	TevSTIB805.3.920	Tb927.3.970	TevSTIB805.3.920
Tb927.1.1540	TevSTIB805.1.1470	Tb927.4.1070	TevSTIB805.4.1120	Tb927.4.1070	TevSTIB805.4.1120
Tb927.1.1550	TevSTIB805.1.1480	Tb927.4.1500	TevSTIB805.4.1550	Tb927.4.1500	TevSTIB805.4.1550
Tb927.1.1560	TevSTIB805.1.1490	Tb927.4.1790	TevSTIB805.4.1870	Tb927.4.1790	TevSTIB805.4.1870
Tb927.1.1630	TevSTIB805.1.1560	Tb927.4.1810	TevSTIB805.4.1880	Tb927.4.1810	TevSTIB805.4.1880
Tb927.1.1640	TevSTIB805.1.1570	Tb927.4.2720	TevSTIB805.4.2830	Tb927.4.2720	TevSTIB805.4.2830
Tb927.1.1650	TevSTIB805.1.990	Tb927.4.2950	TevSTIB805.4.3070	Tb927.4.2950	TevSTIB805.4.3070
Tb927.1.1660	TevSTIB805.1.1590	Tb927.4.3690	TevSTIB805.4.3780	Tb927.4.3690	TevSTIB805.4.3780
Tb927.1.1670	TevSTIB805.1.1600	Tb927.4.4160	TevSTIB805.4.4340	Tb927.4.4160	TevSTIB805.4.4340
Tb927.1.1680	TevSTIB805.1.1610	Tb927.4.4600	TevSTIB805.4.4780	Tb927.4.4600	TevSTIB805.4.4780
Tb927.1.1700	TevSTIB805.1.1630	Tb927.4.4610	TevSTIB805.4.4790	Tb927.4.4610	TevSTIB805.4.4790
Tb927.1.1710	TevSTIB805.1.1640	Tb927.4.930	TevSTIB805.4.980	Tb927.4.930	TevSTIB805.4.980
Tb927.1.1720	TevSTIB805.1.1650	Tb927.5.1090	TevSTIB805.5.1230	Tb927.5.1090	TevSTIB805.5.1230
Tb927.1.1740	TevSTIB805.1.1670	Tb927.5.1510	TevSTIB805.5.1690	Tb927.5.1510	TevSTIB805.5.1690
Tb927.1.1750	TevSTIB805.1.1680	Tb927.5.1790	TevSTIB805.5.2010	Tb927.5.1790	TevSTIB805.5.2010
Tb927.1.1770	TevSTIB805.1.1700	Tb927.5.2070	TevSTIB805.5.2390	Tb927.5.2070	TevSTIB805.5.2390
Tb927.1.1780	TevSTIB805.1.1710	Tb927.5.2780	TevSTIB805.5.3220	Tb927.5.2780	TevSTIB805.5.3220
Tb927.1.1790	TevSTIB805.1.1720	Tb927.5.2790	TevSTIB805.5.3230	Tb927.5.2790	TevSTIB805.5.3230
Tb927.1.1820	TevSTIB805.1.1750	Tb927.5.3010	TevSTIB805.5.3470	Tb927.5.3010	TevSTIB805.5.3470
Tb927.1.1830	TevSTIB805.1.1760	Tb927.5.3110	TevSTIB805.5.3590	Tb927.5.3110	TevSTIB805.5.3590
Tb927.1.1840	TevSTIB805.1.1770	Tb927.5.3360	TevSTIB805.5.3860	Tb927.5.3360	TevSTIB805.5.3860
Tb927.1.1850	TevSTIB805.1.1780	Tb927.5.3410	TevSTIB805.5.3910	Tb927.5.3410	TevSTIB805.5.3910
Tb927.1.1860	TevSTIB805.1.1790	Tb927.5.3640	TevSTIB805.5.4160	Tb927.5.3640	TevSTIB805.5.4160
Tb927.1.1870	TevSTIB805.1.1800	Tb927.5.3870	TevSTIB805.5.4430	Tb927.5.3870	TevSTIB805.5.4430
Tb927.1.1880	TevSTIB805.1.1810	Tb927.5.3980	TevSTIB805.5.4540	Tb927.5.3980	TevSTIB805.5.4540
Tb927.1.1890	TevSTIB805.1.1820	Tb927.5.4040	TevSTIB805.5.4600	Tb927.5.4040	TevSTIB805.5.4600
Tb927.1.190	TevSTIB805.1.160	Tb927.5.4120	TevSTIB805.5.4680	Tb927.5.4120	TevSTIB805.5.4680
Tb927.1.1910	TevSTIB805.1.1840	Tb927.6.1250	TevSTIB805.6.1320	Tb927.6.1250	TevSTIB805.6.1320
Tb927.1.1920	TevSTIB805.1.1850	Tb927.6.1440	TevSTIB805.6.1490	Tb927.6.1440	TevSTIB805.6.1490
Tb927.1.1960	TevSTIB805.1.1880	Tb927.6.1680	TevSTIB805.6.1730	Tb927.6.1680	TevSTIB805.6.1730
Tb927.1.1980	TevSTIB805.1.1900	Tb927.6.2080	TevSTIB805.6.2130	Tb927.6.2080	TevSTIB805.6.2130
Tb927.1.1990	TevSTIB805.1.1910	Tb927.6.2140	TevSTIB805.6.2190	Tb927.6.2140	TevSTIB805.6.2190
Tb927.1.2000	TevSTIB805.1.1920	Tb927.6.2180	TevSTIB805.6.2250	Tb927.6.2180	TevSTIB805.6.2250
Tb927.1.2010	TevSTIB805.1.1930	Tb927.6.2420	TevSTIB805.6.2490	Tb927.6.2420	TevSTIB805.6.2490
Tb927.1.2020	TevSTIB805.1.1940	Tb927.6.2480	TevSTIB805.6.2550	Tb927.6.2480	TevSTIB805.6.2550
Tb927.1.2030	TevSTIB805.1.1950	Tb927.6.3600	TevSTIB805.6.3730	Tb927.6.3600	TevSTIB805.6.3730
Tb927.1.2040	TevSTIB805.1.1960	Tb927.6.3930	TevSTIB805.6.4060	Tb927.6.3930	TevSTIB805.6.4060
Tb927.1.2080	TevSTIB805.1.2000	Tb927.6.4040	TevSTIB805.6.4170	Tb927.6.4040	TevSTIB805.6.4170
Tb927.1.2090	TevSTIB805.1.2010	Tb927.6.4080	TevSTIB805.6.4210	Tb927.6.4080	TevSTIB805.6.4210
Tb927.1.2100	TevSTIB805.1.2020	Tb927.6.4200	TevSTIB805.6.4330	Tb927.6.4200	TevSTIB805.6.4330
Tb927.1.2110	TevSTIB805.1.2030	Tb927.6.4560	TevSTIB805.6.4690	Tb927.6.4560	TevSTIB805.6.4690
Tb927.1.2120	TevSTIB805.1.2040	Tb927.6.4580	TevSTIB805.6.4710	Tb927.6.4580	TevSTIB805.6.4710
Tb927.1.2130	TevSTIB805.1.2050	Tb927.6.4930	TevSTIB805.6.5100	Tb927.6.4930	TevSTIB805.6.5100
Tb927.1.2150	TevSTIB805.1.2070	Tb927.7.1000	TevSTIB805.7.970	Tb927.7.1000	TevSTIB805.7.970
Tb927.1.2160	TevSTIB805.1.2080	Tb927.7.1550	TevSTIB805.7.1570	Tb927.7.1550	TevSTIB805.7.1570
Tb927.1.220	TevSTIB805.1.170	Tb927.7.1640	TevSTIB805.7.1670	Tb927.7.1640	TevSTIB805.7.1670
Tb927.1.2210	TevSTIB805.1.2120	Tb927.7.2570	TevSTIB805.7.2650	Tb927.7.2570	TevSTIB805.7.2650
Tb927.1.2230	TevSTIB805.1.2140	Tb927.7.2620	TevSTIB805.7.2710	Tb927.7.2620	TevSTIB805.7.2710
Tb927.1.2260	TevSTIB805.1.2170	Tb927.7.2630	TevSTIB805.7.2720	Tb927.7.2630	TevSTIB805.7.2720
Tb927.1.2300	TevSTIB805.1.2210	Tb927.7.2760	TevSTIB805.7.2870	Tb927.7.2760	TevSTIB805.7.2870
Tb927.1.2310	TevSTIB805.1.2220	Tb927.7.2970	TevSTIB805.7.3080	Tb927.7.2970	TevSTIB805.7.3080
Tb927.1.2340	TevSTIB805.1.2310	Tb927.7.3050	TevSTIB805.7.3170	Tb927.7.3050	TevSTIB805.7.3170
Tb927.1.2420	TevSTIB805.1.2330	Tb927.7.3240	TevSTIB805.7.3410	Tb927.7.3240	TevSTIB805.7.3410
Tb927.1.2440	TevSTIB805.1.2470	Tb927.7.3430	TevSTIB805.7.3600	Tb927.7.3430	TevSTIB805.7.3600
Tb927.1.2580	TevSTIB805.1.2490	Tb927.7.3460	TevSTIB805.7.3630	Tb927.7.3460	TevSTIB805.7.3630
Tb927.1.2590	TevSTIB805.1.2500	Tb927.7.3510	TevSTIB805.7.3680	Tb927.7.3510	TevSTIB805.7.3680
Tb927.1.2610	TevSTIB805.1.2520	Tb927.7.3950	TevSTIB805.7.4200	Tb927.7.3950	TevSTIB805.7.4200
Tb927.1.2650	TevSTIB805.1.2560	Tb927.7.3960	TevSTIB805.7.4210	Tb927.7.3960	TevSTIB805.7.4210
Tb927.1.2670	TevSTIB805.1.2580	Tb927.7.4140	TevSTIB805.7.4430	Tb927.7.4140	TevSTIB805.7.4430
Tb927.1.270	TevSTIB805.1.190	Tb927.7.4550	TevSTIB805.7.4900	Tb927.7.4550	TevSTIB805.7.4900
Tb927.1.2700	TevSTIB805.1.2610	Tb927.7.4710	TevSTIB805.7.5100	Tb927.7.4710	TevSTIB805.7.5100
Tb927.1.2720	TevSTIB805.1.2630	Tb927.7.600	TevSTIB805.7.540	Tb927.7.600	TevSTIB805.7.540
Tb927.1.2740	TevSTIB805.1.2650	Tb927.7.610	TevSTIB805.7.550	Tb927.7.610	TevSTIB805.7.550
Tb927.1.2750	TevSTIB805.1.2660	Tb927.7.6800	TevSTIB805.7.7450	Tb927.7.6800	TevSTIB805.7.7450
Tb927.1.2760	TevSTIB805.1.2670	Tb927.7.7010	TevSTIB805.7.7750	Tb927.7.7010	TevSTIB805.7.7750
Tb927.1.2770	TevSTIB805.1.2680	Tb927.7.800	TevSTIB805.7.750	Tb927.7.800	TevSTIB805.7.750
Tb927.1.2780	TevSTIB805.1.2690	Tb927.8.1430	TevSTIB805.8.1340	Tb927.8.1430	TevSTIB805.8.1340
Tb927.1.2820	TevSTIB805.1.2710	Tb927.8.1880	TevSTIB805.8.1810	Tb927.8.1880	TevSTIB805.8.1810
Tb927.1.2880	TevSTIB805.1.2770	Tb927.8.2550	TevSTIB805.8.2510	Tb927.8.2550	TevSTIB805.8.2510
Tb927.1.2900	TevSTIB805.1.2790	Tb927.8.2740	TevSTIB805.8.2720	Tb927.8.2740	TevSTIB805.8.2720
Tb927.1.2910	TevSTIB805.1.2800	Tb927.8.2760	TevSTIB805.8.2740	Tb927.8.2760	TevSTIB805.8.2740
Tb927.1.2920	TevSTIB805.1.2810	Tb927.8.3110	TevSTIB805.8.3190	Tb927.8.3110	TevSTIB805.8.3190
Tb927.1.2930	TevSTIB805.1.2820	Tb927.8.3170	TevSTIB805.8.3250	Tb927.8.3170	TevSTIB805.8.3250
Tb927.1.2940	TevSTIB805.1.2830	Tb927.8.3300	TevSTIB805.8.3390	Tb927.8.3300	TevSTIB805.8.3390
Tb927.1.2960	TevSTIB805.1.2850	Tb927.8.4550	TevSTIB805.8.4700	Tb927.8.4550	TevSTIB805.8.4700
Tb927.1.2970	TevSTIB805.1.2860	Tb927.8.4860	TevSTIB805.8.5020	Tb927.8.4860	TevSTIB805.8.5020
Tb927.1.2980	TevSTIB805.1.2870	Tb927.8.5200	TevSTIB805.8.5390	Tb927.8.5200	TevSTIB805.8.5390
Tb927.1.2985	TevSTIB805.1.2880	Tb927.8.5280	TevSTIB805.8.5470	Tb927.8.5280	TevSTIB805.8.5470
Tb927.1.30	TevSTIB805.1.40	Tb927.8.5700	TevSTIB805.8.5960	Tb927.8.5700	TevSTIB805.8.5960
Tb927.1.3000	TevSTIB805.1.2900	Tb927.8.5860	TevSTIB805.8.6120	Tb927.8.5860	TevSTIB805.8.6120
Tb927.1.3020	TevSTIB805.1.2920	Tb927.8.620	TevSTIB805.8.520	Tb927.8.620	TevSTIB805.8.520
Tb927.1.3050	TevSTIB805.1.2950	Tb927.8.680	TevSTIB805.8.580	Tb927.8.680	TevSTIB805.8.580
Tb927.1.3070	TevSTIB805.1.2960	Tb927.8.700	TevSTIB805.8.600	Tb927.8.700	TevSTIB805.8.600
Tb927.1.3080	TevSTIB805.1.2970	Tb927.8.7260	TevSTIB805.8.7620	Tb927.8.7260	TevSTIB805.8.7620
Tb927.1.3090	TevSTIB805.1.2980	Tb927.8.8170	TevSTIB805.8.8660	Tb927.8.8170	TevSTIB805.8.8660
Tb927.1.3100	TevSTIB805.1.2990	Tb927.8.8180	TevSTIB805.8.8670	Tb927.8.8180	TevSTIB805.8.8670
Tb927.1.3110	TevSTIB805.1.3000	Tb927.9.11120	TevSTIB805.9.7940	Tb927.9.11120	TevSTIB805.9.7940
Tb927.1.3120	TevSTIB805.1.3010	Tb927.9.11280	TevSTIB805.9.8090	Tb927.9.11280	TevSTIB805.9.8090
Tb927.1.3130	TevSTIB805.1.3020	Tb927.9.11880	TevSTIB805.9.8510	Tb927.9.11880	TevSTIB805.9.8510
Tb927.1.3140	TevSTIB805.1.3030	Tb927.9.12850	TevSTIB805.9.9250	Tb927.9.12850	TevSTIB805.9.9250
Tb927.1.3150	TevSTIB805.1.3040	Tb927.9.13780	TevSTIB805.9.9940	Tb927.9.13780	TevSTIB805.9.9940
Tb927.1.3160	TevSTIB805.1.3050	Tb927.9.14050	TevSTIB805.9.10030	Tb927.9.14050	TevSTIB805.9.10030
Tb927.1.3170	TevSTIB805.1.3060	Tb927.9.3350	TevSTIB805.9.2470	Tb927.9.3350	TevSTIB805.9.2470
Tb927.1.3180	TevSTIB805.1.3070	Tb927.9.3640	TevSTIB805.9.2710	Tb927.9.3640	TevSTIB805.9.2710
Tb927.1.3190	TevSTIB805.1.3080	Tb927.9.4360	TevSTIB805.9.3190	Tb927.9.4360	TevSTIB805.9.3190
Tb927.1.3200	TevSTIB805.1.3090	Tb927.9.4440	TevSTIB805.9.3240	Tb927.9.4440	TevSTIB805.9.3240
Tb927.1.3210	TevSTIB805.1.3100	Tb927.9.5280	TevSTIB805.9.3880	Tb927.9.5280	TevSTIB805.9.3880
Tb927.1.3220	TevSTIB805.1.3110	Tb927.9.5590	TevSTIB805.9.4110	Tb927.9.5590	TevSTIB805.9.4110
Tb927.1.3240	TevSTIB805.1.3130	Tb927.9.5630	TevSTIB805.9.4140	Tb927.9.5630	TevSTIB805.9.4140
Tb927.1.3250	TevSTIB805.1.3140	Tb927.9.6510	TevSTIB805.9.4660	Tb927.9.6510	TevSTIB805.9.4660
Tb927.1.3260	TevSTIB805.1.3150	Tb927.9.7170	TevSTIB805.9.5170	Tb927.9.7170	TevSTIB805.9.5170
Tb927.1.3270	TevSTIB805.1.3160	Tb927.9.7210	TevSTIB805.9.5210	Tb927.9.7210	TevSTIB805.9.5210
Tb927.1.3280	TevSTIB805.1.3170	Tb927.9.8290	TevSTIB805.9.5920	Tb927.9.8290	TevSTIB805.9.5920
Tb927.1.3290	TevSTIB805.1.3180	Tb927.9.9150	TevSTIB805.9.6490	Tb927.9.9150	TevSTIB805.9.6490
Tb927.1.3300	TevSTIB805.1.3200	Tb06.3A7.270	TevSTIB805.6.990
Tb927.1.3310	TevSTIB805.1.3210	Tb11.02.5420b	TevSTIB805.11_01.7830
Tb927.1.3320	TevSTIB805.1.3220	Tb11.v5.0396	TevSTIB805.10.17030
Tb927.1.3340	TevSTIB805.1.3240	Tb11.v5.0482	TevSTIB805.11_01.2790
Tb927.1.3360	TevSTIB805.1.3260	Tb11.v5.0519	TevSTIB805.8.3410
Tb927.1.3370	TevSTIB805.1.3270	Tb11.v5.0590	TevSTIB805.7.6160
Tb927.1.3380	TevSTIB805.1.3280	Tb11.v5.0692	TevSTIB805.5.3460
Tb927.1.3390	TevSTIB805.1.3290	Tb927.1.1210	TevSTIB805.1.1150
Tb927.1.340	TevSTIB805.1.280	Tb927.1.1330	TevSTIB805.1.1270
Tb927.1.3400	TevSTIB805.1.3300	Tb927.1.1390	TevSTIB805.1.1330
Tb927.1.3410	TevSTIB805.1.3310	Tb927.1.1580	TevSTIB805.1.1510
Tb927.1.3420	TevSTIB805.1.3320	Tb927.1.1600	TevSTIB805.1.1530
Tb927.1.3450	TevSTIB805.1.3340	Tb927.1.1610	TevSTIB805.1.1540
Tb927.1.3470	TevSTIB805.1.3360	Tb927.1.1730	TevSTIB805.1.1660
Tb927.1.3500	TevSTIB805.1.3390	Tb927.1.2320	TevSTIB805.1.2230
Tb927.1.3510	TevSTIB805.1.3400	Tb927.1.2730	TevSTIB805.1.2640
Tb927.1.3520	TevSTIB805.1.3410	Tb927.1.3010	TevSTIB805.1.2910
Tb927.1.3530	TevSTIB805.1.3420	Tb927.1.3040	TevSTIB805.1.2940
Tb927.1.3540	TevSTIB805.1.3430	Tb927.1.3800	TevSTIB805.1.3710
Tb927.1.3550	TevSTIB805.1.3440	Tb927.1.4100	TevSTIB805.1.4000
Tb927.1.3560	TevSTIB805.1.3450	Tb927.1.4230	TevSTIB805.1.4120
Tb927.1.3570	TevSTIB805.1.3460	Tb927.1.5000	TevSTIB805.1.4900
Tb927.1.3580	TevSTIB805.1.3470	Tb927.1.580	TevSTIB805.1.520
Tb927.1.3590	TevSTIB805.1.3480	Tb927.1.600	TevSTIB805.1.540
Tb927.1.3600	TevSTIB805.1.3490	Tb927.1.730	TevSTIB805.1.670
Tb927.1.3610	TevSTIB805.1.3500	Tb927.1.740	TevSTIB805.1.680
Tb927.1.3630	TevSTIB805.1.3520	Tb927.1.790	TevSTIB805.1.730
Tb927.1.3640	TevSTIB805.1.3530	Tb927.1.840	TevSTIB805.1.780
Tb927.1.3670	TevSTIB805.1.3580	Tb927.10.10120	TevSTIB805.10.10710
Tb927.1.3680	TevSTIB805.1.3590	Tb927.10.10160	TevSTIB805.10.10750
Tb927.1.3710	TevSTIB805.2.830	Tb927.10.10280	TevSTIB805.10.10860
Tb927.1.3730	TevSTIB805.3.3600	Tb927.10.10300	TevSTIB805.10.10880
Tb927.1.3740	TevSTIB805.3.3620	Tb927.10.10310	TevSTIB805.10.10890
Tb927.1.3770	TevSTIB805.1.3700	Tb927.10.10420	TevSTIB805.10.11010
Tb927.1.380	TevSTIB805.1.330	Tb927.10.10610	TevSTIB805.10.11210
Tb927.1.3810	TevSTIB805.1.3720	Tb927.10.10780	TevSTIB805.10.11370
Tb927.1.3820	TevSTIB805.1.3730	Tb927.10.10820	TevSTIB805.10.11410
Tb927.1.3830	TevSTIB805.1.3740	Tb927.10.11030	TevSTIB805.10.11610
Tb927.1.3850	TevSTIB805.1.3760	Tb927.10.11160	TevSTIB805.10.11730
Tb927.1.3860	TevSTIB805.1.3770	Tb927.10.11190	TevSTIB805.10.11760
Tb927.1.3870	TevSTIB805.1.3780	Tb927.10.11340	TevSTIB805.10.11920
Tb927.1.3890	TevSTIB805.1.3800	Tb927.10.11420	TevSTIB805.10.12000
Tb927.1.3900	TevSTIB805.1.3810	Tb927.10.11500	TevSTIB805.10.12070
Tb927.1.3910	TevSTIB805.1.3820	Tb927.10.11520	TevSTIB805.10.12090
Tb927.1.3920	TevSTIB805.1.3830	Tb927.10.1160	TevSTIB805.10.1260
Tb927.1.3930	TevSTIB805.1.3840	Tb927.10.11770	TevSTIB805.10.12340
Tb927.1.3940	TevSTIB805.1.3850	Tb927.10.1180	TevSTIB805.10.1280
Tb927.1.3960	TevSTIB805.1.3870	Tb927.10.11890	TevSTIB805.10.12440
Tb927.1.3970	TevSTIB805.1.3880	Tb927.10.11900	TevSTIB805.10.12450
Tb927.1.3990	TevSTIB805.1.3890	Tb927.10.12000	TevSTIB805.10.12560
Tb927.1.40	TevSTIB805.1.50	Tb927.10.12250	TevSTIB805.10.12850
Tb927.1.4020	TevSTIB805.1.3920	Tb927.10.1230	TevSTIB805.10.1340
Tb927.1.4030	TevSTIB805.1.3930	Tb927.10.1240	TevSTIB805.10.1350
Tb927.1.4040	TevSTIB805.1.3940	Tb927.10.12510	TevSTIB805.10.13110
Tb927.1.4050	TevSTIB805.1.3950	Tb927.10.12520	TevSTIB805.10.13120
Tb927.1.4060	TevSTIB805.1.3960	Tb927.10.12540	TevSTIB805.10.13140
Tb927.1.4070	TevSTIB805.1.3970	Tb927.10.12550	TevSTIB805.10.13150
Tb927.1.4080	TevSTIB805.1.3980	Tb927.10.12700	TevSTIB805.10.13320
Tb927.1.4130	TevSTIB805.1.4020	Tb927.10.12840	TevSTIB805.10.13460
Tb927.1.4140	TevSTIB805.1.4030	Tb927.10.12900	TevSTIB805.10.13530
Tb927.1.4150	TevSTIB805.1.4040	Tb927.10.13120	TevSTIB805.10.13760
Tb927.1.4160	TevSTIB805.1.4050	Tb927.10.13200	TevSTIB805.10.13840
Tb927.1.4170	TevSTIB805.1.4060	Tb927.10.13230	TevSTIB805.10.13870
Tb927.1.4180	TevSTIB805.1.4070	Tb927.10.1340	TevSTIB805.10.1450
Tb927.1.4190	TevSTIB805.1.4080	Tb927.10.13600	TevSTIB805.10.14290
Tb927.1.4200	TevSTIB805.1.4090	Tb927.10.13620	TevSTIB805.10.14310
Tb927.1.4210	TevSTIB805.1.4100	Tb927.10.13770	TevSTIB805.10.14470
Tb927.1.4220	TevSTIB805.1.4110	Tb927.10.13830	TevSTIB805.10.14530
Tb927.1.4240	TevSTIB805.1.4130	Tb927.10.13850	TevSTIB805.10.14550
Tb927.1.4250	TevSTIB805.1.4140	Tb927.10.13990	TevSTIB805.10.14700
Tb927.1.4260	TevSTIB805.1.4150	Tb927.10.14110	TevSTIB805.10.14840
Tb927.1.4270	TevSTIB805.1.4160	Tb927.10.14250	TevSTIB805.10.14990
Tb927.1.4280	TevSTIB805.1.4170	Tb927.10.14350	TevSTIB805.10.15100
Tb927.1.4290	TevSTIB805.1.4180	Tb927.10.1440	TevSTIB805.10.1550
Tb927.1.4300	TevSTIB805.1.4190	Tb927.10.14590	TevSTIB805.10.15340
Tb927.1.4310	TevSTIB805.1.4200	Tb927.10.14860	TevSTIB805.10.15620
Tb927.1.4320	TevSTIB805.1.4210	Tb927.10.15010	TevSTIB805.10.15800
Tb927.1.4330	TevSTIB805.1.4220	Tb927.10.15420	TevSTIB805.10.16240
Tb927.1.4340	TevSTIB805.1.4230	Tb927.10.15660	TevSTIB805.10.16490
Tb927.1.4350	TevSTIB805.1.4240	Tb927.10.15710	TevSTIB805.10.16540
Tb927.1.4360	TevSTIB805.1.4250	Tb927.10.15830	TevSTIB805.10.16670
Tb927.1.4370	TevSTIB805.1.4260	Tb927.10.1660	TevSTIB805.10.1770
Tb927.1.4380	TevSTIB805.1.4270	Tb927.10.1730	TevSTIB805.10.1850
Tb927.1.4390	TevSTIB805.1.4280	Tb927.10.180	TevSTIB805.10.220
Tb927.1.4400	TevSTIB805.1.4290	Tb927.10.1930	TevSTIB805.10.2070
Tb927.1.4410	TevSTIB805.1.4300	Tb927.10.1950	TevSTIB805.10.2090
Tb927.1.4420	TevSTIB805.1.4310	Tb927.10.2050	TevSTIB805.10.2210
Tb927.1.4430	TevSTIB805.1.4320	Tb927.10.2070	TevSTIB805.10.2230
Tb927.1.4440	TevSTIB805.1.4330	Tb927.10.2230	TevSTIB805.10.2390
Tb927.1.4450	TevSTIB805.1.4340	Tb927.10.2300	TevSTIB805.10.2470
Tb927.1.4460	TevSTIB805.1.4350	Tb927.10.2350	TevSTIB805.10.2520
Tb927.1.4470	TevSTIB805.1.4360	Tb927.10.2560	TevSTIB805.10.2770
Tb927.1.4480	TevSTIB805.1.4370	Tb927.10.2590	TevSTIB805.10.2800
Tb927.1.4490	TevSTIB805.1.4380	Tb927.10.2680	TevSTIB805.10.2900
Tb927.1.4500	TevSTIB805.1.4390	Tb927.10.280	TevSTIB805.10.320
Tb927.1.4510	TevSTIB805.1.4400	Tb927.10.2950	TevSTIB805.10.3190
Tb927.1.4520	TevSTIB805.1.4410	Tb927.10.2970	TevSTIB805.10.3210
Tb927.1.4530	TevSTIB805.1.4420	Tb927.10.3040	TevSTIB805.10.3280
Tb927.1.4620	TevSTIB805.1.4510	Tb927.10.3080	TevSTIB805.10.3330
Tb927.1.4650	TevSTIB805.1.4550	Tb927.10.3120	TevSTIB805.10.3370
Tb927.1.4680	TevSTIB805.1.4580	Tb927.10.3210	TevSTIB805.10.3460
Tb927.1.4690	TevSTIB805.1.4590	Tb927.10.3320	TevSTIB805.10.3570
Tb927.1.470	TevSTIB805.1.420	Tb927.10.3510	TevSTIB805.10.3740
Tb927.1.4700	TevSTIB805.1.4600	Tb927.10.3590	TevSTIB805.10.3820
Tb927.1.4710	TevSTIB805.1.4610	Tb927.10.3610	TevSTIB805.10.3840
Tb927.1.4720	TevSTIB805.1.4620	Tb927.10.3740	TevSTIB805.10.3970
Tb927.1.4730	TevSTIB805.1.4630	Tb927.10.3770	TevSTIB805.10.4000
Tb927.1.4740	TevSTIB805.1.4640	Tb927.10.4000	TevSTIB805.10.4270
Tb927.1.4750	TevSTIB805.1.4650	Tb927.10.4080	TevSTIB805.10.4350
Tb927.1.4760	TevSTIB805.1.4660	Tb927.10.4130	TevSTIB805.10.4390
Tb927.1.4770	TevSTIB805.1.4670	Tb927.10.4220	TevSTIB805.10.4480
Tb927.1.480	TevSTIB805.1.430	Tb927.10.4230	TevSTIB805.10.4490
Tb927.1.4800	TevSTIB805.1.4700	Tb927.10.4240	TevSTIB805.10.4500
Tb927.1.4830	TevSTIB805.1.4730	Tb927.10.4280	TevSTIB805.10.4540
Tb927.1.4880	TevSTIB805.1.4780	Tb927.10.430	TevSTIB805.10.470
Tb927.1.4910	TevSTIB805.1.4810	Tb927.10.4550	TevSTIB805.10.4840
Tb927.1.4930	TevSTIB805.1.4830	Tb927.10.4590	TevSTIB805.10.4880
Tb927.1.4940	TevSTIB805.1.4840	Tb927.10.4850	TevSTIB805.10.5140
Tb927.1.4950	TevSTIB805.1.4850	Tb927.10.4880	TevSTIB805.10.5170
Tb927.1.4960	TevSTIB805.1.4860	Tb927.10.4910	TevSTIB805.10.5200
Tb927.1.4970	TevSTIB805.1.4870	Tb927.10.5010	TevSTIB805.10.5300
Tb927.1.4980	TevSTIB805.1.4880	Tb927.10.5050	TevSTIB805.10.5340
Tb927.1.4990	TevSTIB805.1.4890	Tb927.10.5060	TevSTIB805.10.5350
Tb927.1.5010	TevSTIB805.1.4910	Tb927.10.510	TevSTIB805.10.550
Tb927.1.5030	TevSTIB805.1.4930	Tb927.10.520	TevSTIB805.10.560
Tb927.1.5050	TevSTIB805.1.4950	Tb927.10.5220	TevSTIB805.10.5520
Tb927.1.5070	TevSTIB805.1.4970	Tb927.10.5390	TevSTIB805.10.5730
Tb927.1.5120	TevSTIB805.1.5020	Tb927.10.5500	TevSTIB805.10.5840
Tb927.1.5130	TevSTIB805.1.5030	Tb927.10.5540	TevSTIB805.10.5880
Tb927.1.5140	TevSTIB805.1.5040	Tb927.10.5590	TevSTIB805.10.5930
Tb927.1.5150	TevSTIB805.1.5050	Tb927.10.5820	TevSTIB805.10.6170
Tb927.1.5160	TevSTIB805.1.5060	Tb927.10.5830	TevSTIB805.10.6180
Tb927.1.5180	TevSTIB805.1.5080	Tb927.10.6170	TevSTIB805.10.6520
Tb927.1.5190	TevSTIB805.1.5090	Tb927.10.6200	TevSTIB805.10.6550
Tb927.1.5200	TevSTIB805.1.5100	Tb927.10.660	TevSTIB805.10.720
Tb927.1.5220	TevSTIB805.1.5110	Tb927.10.6730	TevSTIB805.10.7110
Tb927.1.5230	TevSTIB805.1.5120	Tb927.10.7090	TevSTIB805.10.7530
Tb927.1.5235	TevSTIB805.1.5130	Tb927.10.7410	TevSTIB805.10.7880
Tb927.1.5240	TevSTIB805.1.5140	Tb927.10.7570	TevSTIB805.10.8040
Tb927.1.5260	TevSTIB805.1.5160	Tb927.10.7590	TevSTIB805.10.8060
Tb927.1.5270	TevSTIB805.1.5200	Tb927.10.760	TevSTIB805.10.820
Tb927.1.5290	TevSTIB805.1.5220	Tb927.10.7600	TevSTIB805.10.8070
Tb927.1.550	TevSTIB805.1.490	Tb927.10.7620	TevSTIB805.10.8090
Tb927.1.560	TevSTIB805.1.500	Tb927.10.770	TevSTIB805.10.830
Tb927.1.570	TevSTIB805.1.510	Tb927.10.7910	TevSTIB805.10.8390
Tb927.1.590	TevSTIB805.1.530	Tb927.10.8010	TevSTIB805.10.8500
Tb927.1.610	TevSTIB805.1.550	Tb927.10.8030	TevSTIB805.10.8520
Tb927.1.620	TevSTIB805.1.560	Tb927.10.8110	TevSTIB805.10.8600
Tb927.1.630	TevSTIB805.1.570	Tb927.10.8320	TevSTIB805.10.8810
Tb927.1.640	TevSTIB805.1.580	Tb927.10.8410	TevSTIB805.10.8920
Tb927.1.650	TevSTIB805.1.590	Tb927.10.8450	TevSTIB805.10.8960
Tb927.1.660	TevSTIB805.1.600	Tb927.10.8610	TevSTIB805.10.9150
Tb927.1.670	TevSTIB805.1.610	Tb927.10.8630	TevSTIB805.10.9170
Tb927.1.680	TevSTIB805.1.620	Tb927.10.8730	TevSTIB805.10.9270
Tb927.1.690	TevSTIB805.1.630	Tb927.10.8930	TevSTIB805.10.9490
Tb927.1.70	TevSTIB805.1.80	Tb927.10.9070	TevSTIB805.10.9630
Tb927.1.700	TevSTIB805.1.640	Tb927.10.9120	TevSTIB805.10.9680
Tb927.1.750	TevSTIB805.1.690	Tb927.10.9140	TevSTIB805.10.9700
Tb927.1.760	TevSTIB805.1.700	Tb927.10.9280	TevSTIB805.10.9860
Tb927.1.780	TevSTIB805.1.720	Tb927.10.9350	TevSTIB805.10.9930
Tb927.1.80	TevSTIB805.2.550	Tb927.10.9360	TevSTIB805.10.9940
Tb927.1.800	TevSTIB805.1.740	Tb927.10.9390	TevSTIB805.10.9970
Tb927.1.820	TevSTIB805.1.760	Tb927.10.9440	TevSTIB805.10.10020
Tb927.1.830	TevSTIB805.1.770	Tb927.10.9760	TevSTIB805.10.10340
Tb927.1.850	TevSTIB805.1.790	Tb927.10.9810	TevSTIB805.10.10390
Tb927.1.860	TevSTIB805.1.800	Tb927.10.9820	TevSTIB805.10.10400
Tb927.1.870	TevSTIB805.1.810	Tb927.10.9830	TevSTIB805.10.10410
Tb927.1.880	TevSTIB805.1.820	Tb927.10.9860	TevSTIB805.10.10440
Tb927.1.890	TevSTIB805.1.830	Tb927.10.9970	TevSTIB805.10.10560
Tb927.1.900	TevSTIB805.1.840	Tb927.11.1010	TevSTIB805.11_01.1020
Tb927.1.910	TevSTIB805.1.850	Tb927.11.10140	TevSTIB805.11_01.10450
Tb927.1.950	TevSTIB805.1.900	Tb927.11.10240	TevSTIB805.11_01.10550
Tb927.1.970	TevSTIB805.1.920	Tb927.11.10390	TevSTIB805.11_01.10700
Tb927.1.980	TevSTIB805.1.930	Tb927.11.10590	TevSTIB805.11_01.10910
Tb927.1.990	TevSTIB805.1.940	Tb927.11.10600	TevSTIB805.11_01.10920
Tb927.10.1000	TevSTIB805.10.1090	Tb927.11.10690	TevSTIB805.11_01.11010
Tb927.10.10000	TevSTIB805.10.10590	Tb927.11.10720	TevSTIB805.11_01.11040
Tb927.10.10010	TevSTIB805.10.10600	Tb927.11.10780	TevSTIB805.11_01.11110
Tb927.10.10020	TevSTIB805.10.10610	Tb927.11.10870	TevSTIB805.11_01.11200
Tb927.10.10030	TevSTIB805.10.10620	Tb927.11.10880	TevSTIB805.11_01.11210
Tb927.10.10040	TevSTIB805.10.10630	Tb927.11.10950	TevSTIB805.11_01.11280
Tb927.10.10050	TevSTIB805.10.10640	Tb927.11.10960	TevSTIB805.11_01.11300
Tb927.10.10070	TevSTIB805.10.10660	Tb927.11.11050	TevSTIB805.11_01.11390
Tb927.10.10080	TevSTIB805.10.10670	Tb927.11.11120	TevSTIB805.11_01.11460
Tb927.10.10090	TevSTIB805.10.10680	Tb927.11.11310	TevSTIB805.11_01.11670
Tb927.10.10100	TevSTIB805.10.10690	Tb927.11.11380	TevSTIB805.11_01.11740
Tb927.10.10110	TevSTIB805.10.10700	Tb927.11.11460	TevSTIB805.11_01.11840
Tb927.10.10140	TevSTIB805.10.10730	Tb927.11.11620	TevSTIB805.11_01.11990
Tb927.10.10150	TevSTIB805.10.10740	Tb927.11.11680	TevSTIB805.11_01.12050
Tb927.10.10170	TevSTIB805.10.10760	Tb927.11.11950	TevSTIB805.11_01.12320
Tb927.10.10180	TevSTIB805.10.10770	Tb927.11.12040	TevSTIB805.11_01.12420
Tb927.10.10190	TevSTIB805.10.10780	Tb927.11.12160	TevSTIB805.11_01.12550
Tb927.10.1020	TevSTIB805.10.1120	Tb927.11.1270	TevSTIB805.11_01.1260
Tb927.10.10200	TevSTIB805.10.10790	Tb927.11.1290	TevSTIB805.11_01.1280
Tb927.10.10210	TevSTIB805.10.10800	Tb927.11.13140	TevSTIB805.11_01.13580
Tb927.10.10220	TevSTIB805.10.10810	Tb927.11.13180	TevSTIB805.11_01.13630
Tb927.10.10270	TevSTIB805.10.10850	Tb927.11.1320	TevSTIB805.11_01.1310
Tb927.10.1030	TevSTIB805.10.1130	Tb927.11.13230	TevSTIB805.11_01.13680
Tb927.10.10320	TevSTIB805.10.10900	Tb927.11.13290	TevSTIB805.11_01.13740
Tb927.10.10340	TevSTIB805.10.10920	Tb927.11.13440	TevSTIB805.11_01.13890
Tb927.10.10350	TevSTIB805.10.10940	Tb927.11.1350	TevSTIB805.11_01.1340
Tb927.10.10370	TevSTIB805.10.10960	Tb927.11.13510	TevSTIB805.11_01.13960
Tb927.10.10380	TevSTIB805.10.10970	Tb927.11.13520	TevSTIB805.11_01.13970
Tb927.10.10390	TevSTIB805.10.10980	Tb927.11.13560	TevSTIB805.11_01.14010
Tb927.10.10410	TevSTIB805.10.11000	Tb927.11.13580	TevSTIB805.11_01.14030
Tb927.10.10430	TevSTIB805.10.11020	Tb927.11.13600	TevSTIB805.11_01.14050
Tb927.10.10440	TevSTIB805.10.11030	Tb927.11.13620	TevSTIB805.11_01.14070
Tb927.10.1050	TevSTIB805.10.1150	Tb927.11.1370	TevSTIB805.11_01.1360
Tb927.10.10600	TevSTIB805.10.11200	Tb927.11.13830	TevSTIB805.11_01.14290
Tb927.10.10620	TevSTIB805.10.11220	Tb927.11.13890	TevSTIB805.11_01.14360
Tb927.10.10630	TevSTIB805.10.11230	Tb927.11.13910	TevSTIB805.11_01.14380
Tb927.10.10640	TevSTIB805.10.11240	Tb927.11.1400	TevSTIB805.11_01.1390
Tb927.10.10650	TevSTIB805.10.11250	Tb927.11.14320	TevSTIB805.11_01.14810
Tb927.10.10670	TevSTIB805.10.11260	Tb927.11.14360	TevSTIB805.11_01.14850
Tb927.10.10680	TevSTIB805.10.11270	Tb927.11.14380	TevSTIB805.11_01.14870
Tb927.10.10690	TevSTIB805.10.11280	Tb927.11.1450	TevSTIB805.11_01.1440
Tb927.10.1070	TevSTIB805.10.1170	Tb927.11.14570	TevSTIB805.11_01.15060
Tb927.10.10700	TevSTIB805.10.11290	Tb927.11.14660	TevSTIB805.11_01.15180
Tb927.10.10710	TevSTIB805.10.11300	Tb927.11.14700	TevSTIB805.11_01.15220
Tb927.10.10720	TevSTIB805.10.11310	Tb927.11.14730	TevSTIB805.11_01.15250
Tb927.10.10730	TevSTIB805.10.11320	Tb927.11.15040	TevSTIB805.11_01.15570
Tb927.10.10740	TevSTIB805.10.11330	Tb927.11.15110	TevSTIB805.11_01.15640
Tb927.10.10750	TevSTIB805.10.11340	Tb927.11.1540	TevSTIB805.11_01.1530
Tb927.10.10760	TevSTIB805.10.11350	Tb927.11.15440	TevSTIB805.11_01.15970
Tb927.10.10770	TevSTIB805.10.11360	Tb927.11.15650	TevSTIB805.11_01.16180
Tb927.10.10790	TevSTIB805.10.11380	Tb927.11.15700	TevSTIB805.11_01.16230
Tb927.10.10800	TevSTIB805.10.11390	Tb927.11.15820	TevSTIB805.11_01.16370
Tb927.10.10810	TevSTIB805.10.11400	Tb927.11.15890	TevSTIB805.11_01.16440
Tb927.10.10850	TevSTIB805.10.11440	Tb927.11.1620	TevSTIB805.11_01.1610
Tb927.10.10870	TevSTIB805.10.11450	Tb927.11.16220	TevSTIB805.11_01.16780
Tb927.10.1090	TevSTIB805.10.1190	Tb927.11.16420	TevSTIB805.11_01.17000
Tb927.10.10910	TevSTIB805.10.11490	Tb927.11.16480	TevSTIB805.11_01.17060
Tb927.10.10990	TevSTIB805.10.11570	Tb927.11.1650	TevSTIB805.11_01.1640
Tb927.10.11000	TevSTIB805.10.11580	Tb927.11.16510	TevSTIB805.11_01.17090
Tb927.10.11010	TevSTIB805.10.11590	Tb927.11.16530	TevSTIB805.11_01.17110
Tb927.10.11040	TevSTIB805.10.11620	Tb927.11.16710	TevSTIB805.11_01.17290
Tb927.10.11060	TevSTIB805.10.11640	Tb927.11.16750	TevSTIB805.11_01.17330
Tb927.10.11070	TevSTIB805.10.11650	Tb927.11.16870	TevSTIB805.11_01.17450
Tb927.10.11090	TevSTIB805.10.11670	Tb927.11.1700	TevSTIB805.11_01.1700
Tb927.10.1110	TevSTIB805.10.1210	Tb927.11.180	TevSTIB805.11_01.100
Tb927.10.11110	TevSTIB805.10.11690	Tb927.11.1850	TevSTIB805.11_01.1860
Tb927.10.11120	TevSTIB805.10.11700	Tb927.11.1950	TevSTIB805.11_01.1980
Tb927.10.11140	TevSTIB805.10.11710	Tb927.11.2010	TevSTIB805.11_01.2040
Tb927.10.11150	TevSTIB805.10.11720	Tb927.11.2160	TevSTIB805.11_01.2190
Tb927.10.11170	TevSTIB805.10.11740	Tb927.11.2180	TevSTIB805.11_01.2210
Tb927.10.11180	TevSTIB805.10.11750	Tb927.11.2190	TevSTIB805.11_01.2220
Tb927.10.1120	TevSTIB805.10.1220	Tb927.11.240	TevSTIB805.11_01.160
Tb927.10.11200	TevSTIB805.10.11770	Tb927.11.2580	TevSTIB805.11_01.2650
Tb927.10.11210	TevSTIB805.10.11780	Tb927.11.2650	TevSTIB805.11_01.2720
Tb927.10.11220	TevSTIB805.10.11790	Tb927.11.2690	TevSTIB805.11_01.2760
Tb927.10.11230	TevSTIB805.10.11800	Tb927.11.2920	TevSTIB805.11_01.3000
Tb927.10.11240	TevSTIB805.10.11810	Tb927.11.3060	TevSTIB805.11_01.3140
Tb927.10.11250	TevSTIB805.10.11820	Tb927.11.3200	TevSTIB805.11_01.3280
Tb927.10.11280	TevSTIB805.10.11860	Tb927.11.3530	TevSTIB805.11_01.3650
Tb927.10.11290	TevSTIB805.10.11870	Tb927.11.3670	TevSTIB805.11_01.3820
Tb927.10.1130	TevSTIB805.10.1230	Tb927.11.3690	TevSTIB805.11_01.3840
Tb927.10.11310	TevSTIB805.10.11890	Tb927.11.3860	TevSTIB805.11_01.3990
Tb927.10.11360	TevSTIB805.10.11940	Tb927.11.3940	TevSTIB805.11_01.4070
Tb927.10.11370	TevSTIB805.10.11950	Tb927.11.3980	TevSTIB805.11_01.4110
Tb927.10.11380	TevSTIB805.10.11960	Tb927.11.4270	TevSTIB805.11_01.4380
Tb927.10.11390	TevSTIB805.10.11970	Tb927.11.4330	TevSTIB805.11_01.4450
Tb927.10.1140	TevSTIB805.10.1240	Tb927.11.4490	TevSTIB805.11_01.4620
Tb927.10.11400	TevSTIB805.10.11980	Tb927.11.4630	TevSTIB805.11_01.4780
Tb927.10.11410	TevSTIB805.10.11990	Tb927.11.4680	TevSTIB805.11_01.4830
Tb927.10.11430	TevSTIB805.10.12010	Tb927.11.4780	TevSTIB805.11_01.4960
Tb927.10.11450	TevSTIB805.10.12030	Tb927.11.480	TevSTIB805.11_01.420
Tb927.10.11460	TevSTIB805.10.12040	Tb927.11.4810	TevSTIB805.11_01.4990
Tb927.10.11470	TevSTIB805.10.12050	Tb927.11.4840	TevSTIB805.11_01.5020
Tb927.10.11480	TevSTIB805.10.12060	Tb927.11.4850	TevSTIB805.11_01.5030
Tb927.10.1150	TevSTIB805.10.1250	Tb927.11.4870	TevSTIB805.11_01.5050
Tb927.10.11510	TevSTIB805.10.12080	Tb927.11.5090	TevSTIB805.11_01.5280
Tb927.10.11530	TevSTIB805.10.12100	Tb927.11.5280	TevSTIB805.11_01.5470
Tb927.10.11540	TevSTIB805.9.4380	Tb927.11.5290	TevSTIB805.11_01.5480
Tb927.10.11550	TevSTIB805.10.12120	Tb927.11.540	TevSTIB805.11_01.480
Tb927.10.11560	TevSTIB805.10.12130	Tb927.11.5450	TevSTIB805.11_01.5650
Tb927.10.11570	TevSTIB805.10.12140	Tb927.11.5600	TevSTIB805.11_01.5800
Tb927.10.11580	TevSTIB805.10.12150	Tb927.11.570	TevSTIB805.11_01.510
Tb927.10.11590	TevSTIB805.10.12160	Tb927.11.5820	TevSTIB805.11_01.6030
Tb927.10.11600	TevSTIB805.10.12170	Tb927.11.5920	TevSTIB805.11_01.6130
Tb927.10.11610	TevSTIB805.10.12180	Tb927.11.5940	TevSTIB805.11_01.6150
Tb927.10.11620	TevSTIB805.10.12190	Tb927.11.600	TevSTIB805.11_01.540
Tb927.10.11630	TevSTIB805.10.12200	Tb927.11.6040	TevSTIB805.11_01.6250
Tb927.10.11640	TevSTIB805.10.12210	Tb927.11.6250	TevSTIB805.11_01.6450
Tb927.10.11650	TevSTIB805.10.12230	Tb927.11.6470	TevSTIB805.11_01.6670
Tb927.10.11660	TevSTIB805.10.12240	Tb927.11.6570	TevSTIB805.11_01.6770
Tb927.10.11670	TevSTIB805.10.12250	Tb927.11.6630	TevSTIB805.11_01.6830
Tb927.10.11690	TevSTIB805.10.12270	Tb927.11.6660	TevSTIB805.11_01.6860
Tb927.10.11700	TevSTIB805.10.12280	Tb927.11.6770	TevSTIB805.11_01.6970
Tb927.10.11710	TevSTIB805.10.12290	Tb927.11.6830	TevSTIB805.11_01.7030
Tb927.10.11720	TevSTIB805.10.12300	Tb927.11.6850	TevSTIB805.11_01.7050
Tb927.10.11730	TevSTIB805.10.12310	Tb927.11.6970	TevSTIB805.11_01.7170
Tb927.10.11750	TevSTIB805.10.12320	Tb927.11.6980	TevSTIB805.11_01.7180
Tb927.10.11760	TevSTIB805.10.12330	Tb927.11.7040	TevSTIB805.11_01.7240
Tb927.10.11780	TevSTIB805.10.12350	Tb927.11.7212	TevSTIB805.11_01.7430
Tb927.10.11810	TevSTIB805.10.12370	Tb927.11.7214	TevSTIB805.11_01.7460
Tb927.10.11830	TevSTIB805.10.12390	Tb927.11.7250	TevSTIB805.11_01.7530
Tb927.10.11840	TevSTIB805.10.12400	Tb927.11.7380	TevSTIB805.11_01.7680
Tb927.10.11880	TevSTIB805.10.12430	Tb927.11.7390	TevSTIB805.11_01.7690
Tb927.10.1190	TevSTIB805.10.1290	Tb927.11.7540	TevSTIB805.11_01.7950
Tb927.10.11910	TevSTIB805.10.12460	Tb927.11.7560	TevSTIB805.11_01.7970
Tb927.10.11920	TevSTIB805.10.12470	Tb927.11.7590	TevSTIB805.11_01.8010
Tb927.10.11930	TevSTIB805.10.12480	Tb927.11.7780	TevSTIB805.11_01.8090
Tb927.10.11940	TevSTIB805.10.12490	Tb927.11.7920	TevSTIB805.11_01.8230
Tb927.10.11950	TevSTIB805.10.12510	Tb927.11.840.2	TevSTIB805.11_01.850
Tb927.10.11960	TevSTIB805.10.12520	Tb927.11.8430	TevSTIB805.11_01.8750
Tb927.10.11980	TevSTIB805.10.12540	Tb927.11.8700	TevSTIB805.11_01.8920
Tb927.10.11990	TevSTIB805.10.12550	Tb927.11.8800	TevSTIB805.11_01.9020
Tb927.10.12010	TevSTIB805.10.12570	Tb927.11.8910	TevSTIB805.11_01.9150
Tb927.10.12020	TevSTIB805.10.12580	Tb927.11.8990	TevSTIB805.11_01.9230
Tb927.10.12030	TevSTIB805.10.12590	Tb927.11.9150	TevSTIB805.11_01.9390
Tb927.10.12060	TevSTIB805.10.12640	Tb927.11.9280	TevSTIB805.11_01.9540
Tb927.10.12070	TevSTIB805.10.12650	Tb927.11.9360	TevSTIB805.11_01.9620
Tb927.10.12080	TevSTIB805.10.12660	Tb927.11.9390	TevSTIB805.11_01.9660
Tb927.10.12090	TevSTIB805.10.12670	Tb927.11.9570	TevSTIB805.11_01.9860
Tb927.10.12100	TevSTIB805.10.12680	Tb927.11.9600	TevSTIB805.11_01.9890
Tb927.10.12110	TevSTIB805.10.12700	Tb927.11.9670	TevSTIB805.11_01.9970
Tb927.10.12130	TevSTIB805.10.12720	Tb927.11.9750	TevSTIB805.11_01.10050
Tb927.10.12140	TevSTIB805.10.12730	Tb927.11.9900	TevSTIB805.11_01.10200
Tb927.10.12150	TevSTIB805.10.12740	Tb927.11.9930	TevSTIB805.11_01.10230
Tb927.10.12160	TevSTIB805.10.12750	Tb927.11.9980	TevSTIB805.11_01.10280
Tb927.10.12170	TevSTIB805.10.12760	Tb927.2.2140	TevSTIB805.2.1160
Tb927.10.12190	TevSTIB805.10.12780	Tb927.2.2210	TevSTIB805.2.1210
Tb927.10.12200	TevSTIB805.10.12800	Tb927.2.2410	TevSTIB805.2.1340
Tb927.10.12210	TevSTIB805.10.12810	Tb927.2.2940	TevSTIB805.2.1610
Tb927.10.12220	TevSTIB805.10.12820	Tb927.2.2970	TevSTIB805.2.1630
Tb927.10.12230	TevSTIB805.10.12830	Tb927.2.3030	TevSTIB805.2.1670
Tb927.10.12260	TevSTIB805.10.12860	Tb927.2.3440	TevSTIB805.2.1880
Tb927.10.12270	TevSTIB805.10.12870	Tb927.2.3610	TevSTIB805.2.1920
Tb927.10.12280	TevSTIB805.10.12880	Tb927.2.4090	TevSTIB805.2.2120
Tb927.10.12290	TevSTIB805.10.12890	Tb927.2.4110	TevSTIB805.2.2130
Tb927.10.12300	TevSTIB805.10.12900	Tb927.2.4380	TevSTIB805.2.2270
Tb927.10.12310	TevSTIB805.10.12910	Tb927.2.4460	TevSTIB805.2.2340
Tb927.10.12320	TevSTIB805.10.12920	Tb927.2.4590	TevSTIB805.2.2440
Tb927.10.12330	TevSTIB805.10.12930	Tb927.2.4610	TevSTIB805.2.2450
Tb927.10.12340	TevSTIB805.10.12940	Tb927.2.4700	TevSTIB805.2.2500
Tb927.10.12350	TevSTIB805.10.12950	Tb927.2.4800	TevSTIB805.2.2580
Tb927.10.12360	TevSTIB805.10.12960	Tb927.2.4830	TevSTIB805.2.2600
Tb927.10.12370	TevSTIB805.10.12970	Tb927.2.5830	TevSTIB805.2.3310
Tb927.10.12390	TevSTIB805.10.12990	Tb927.2.5890	TevSTIB805.2.3350
Tb927.10.12400	TevSTIB805.10.13000	Tb927.2.5930	TevSTIB805.2.3380
Tb927.10.12410	TevSTIB805.10.13010	Tb927.2.5970	TevSTIB805.2.3400
Tb927.10.12420	TevSTIB805.10.13020	Tb927.3.1000	TevSTIB805.3.950
Tb927.10.12430	TevSTIB805.10.13030	Tb927.3.1100	TevSTIB805.3.1060
Tb927.10.12440	TevSTIB805.10.13040	Tb927.3.1160	TevSTIB805.3.1130
Tb927.10.12450	TevSTIB805.10.13050	Tb927.3.1380	TevSTIB805.3.1350
Tb927.10.12460	TevSTIB805.10.13060	Tb927.3.1410	TevSTIB805.3.1380
Tb927.10.12470	TevSTIB805.10.13070	Tb927.3.1690	TevSTIB805.3.1700
Tb927.10.12480	TevSTIB805.10.13080	Tb927.3.1730	TevSTIB805.3.1740
Tb927.10.12490	TevSTIB805.10.13090	Tb927.3.1790	TevSTIB805.3.1800
Tb927.10.1250	TevSTIB805.10.1360	Tb927.3.1810	TevSTIB805.3.1820
Tb927.10.12500	TevSTIB805.10.13100	Tb927.3.1840	TevSTIB805.3.1850
Tb927.10.12530	TevSTIB805.10.13130	Tb927.3.1860	TevSTIB805.3.1870
Tb927.10.12570	TevSTIB805.10.13190	Tb927.3.1890	TevSTIB805.3.1900
Tb927.10.12590	TevSTIB805.10.13210	Tb927.3.1940	TevSTIB805.3.1960
Tb927.10.12600	TevSTIB805.10.13220	Tb927.3.2010	TevSTIB805.3.2030
Tb927.10.12610	TevSTIB805.10.13230	Tb927.3.2050	TevSTIB805.3.2070
Tb927.10.12620	TevSTIB805.10.13240	Tb927.3.2080	TevSTIB805.3.2100
Tb927.10.12630	TevSTIB805.10.13250	Tb927.3.2130	TevSTIB805.3.2150
Tb927.10.12640	TevSTIB805.10.13260	Tb927.3.2180	TevSTIB805.3.2200
Tb927.10.12670	TevSTIB805.10.13290	Tb927.3.2230	TevSTIB805.3.2250
Tb927.10.12690	TevSTIB805.10.13310	Tb927.3.2300	TevSTIB805.3.2330
Tb927.10.1270	TevSTIB805.10.1380	Tb927.3.2370	TevSTIB805.3.2400
Tb927.10.12710	TevSTIB805.10.13330	Tb927.3.2630	TevSTIB805.3.2690
Tb927.10.12720	TevSTIB805.10.13340	Tb927.3.2670	TevSTIB805.3.2730
Tb927.10.12730	TevSTIB805.10.13350	Tb927.3.2810	TevSTIB805.3.2870
Tb927.10.12760	TevSTIB805.10.13380	Tb927.3.2880	TevSTIB805.3.2940
Tb927.10.12770	TevSTIB805.10.13390	Tb927.3.2980	TevSTIB805.3.3040
Tb927.10.12780	TevSTIB805.10.13420	Tb927.3.3050	TevSTIB805.3.3110
Tb927.10.12790	TevSTIB805.10.13410	Tb927.3.3550	TevSTIB805.3.3750
Tb927.10.1280	TevSTIB805.10.1390	Tb927.3.3660	TevSTIB805.3.3880
Tb927.10.12810	TevSTIB805.10.13430	Tb927.3.3680	TevSTIB805.3.3900
Tb927.10.12820	TevSTIB805.10.13440	Tb927.3.3890	TevSTIB805.3.4110
Tb927.10.12830	TevSTIB805.10.13450	Tb927.3.4030	TevSTIB805.3.4270
Tb927.10.12850	TevSTIB805.10.13470	Tb927.3.4090	TevSTIB805.3.4330
Tb927.10.12870	TevSTIB805.10.13490	Tb927.3.4130	TevSTIB805.3.4370
Tb927.10.12880	TevSTIB805.10.13500	Tb927.3.4260	TevSTIB805.3.4500
Tb927.10.12890	TevSTIB805.10.13520	Tb927.3.4380	TevSTIB805.3.4630
Tb927.10.1290	TevSTIB805.10.1400	Tb927.3.4420	TevSTIB805.3.4670
Tb927.10.12930	TevSTIB805.10.13560	Tb927.3.4550	TevSTIB805.3.4800
Tb927.10.12940	TevSTIB805.10.13570	Tb927.3.4780	TevSTIB805.3.5060
Tb927.10.12950	TevSTIB805.10.13580	Tb927.3.4920	TevSTIB805.3.5200
Tb927.10.12960	TevSTIB805.10.13590	Tb927.3.4950	TevSTIB805.3.5230
Tb927.10.12970	TevSTIB805.10.13600	Tb927.3.5190	TevSTIB805.3.5480
Tb927.10.12980	TevSTIB805.10.13610	Tb927.3.5300	TevSTIB805.3.5600
Tb927.10.12990	TevSTIB805.10.13620	Tb927.3.5410	TevSTIB805.3.5710
Tb927.10.1300	TevSTIB805.10.1410	Tb927.3.5430	TevSTIB805.3.5730
Tb927.10.13000	TevSTIB805.10.13630	Tb927.3.5590	TevSTIB805.3.5890
Tb927.10.13010	TevSTIB805.10.13650	Tb927.3.5600	TevSTIB805.3.5900
Tb927.10.13020	TevSTIB805.10.13660	Tb927.3.5630	TevSTIB805.3.5930
Tb927.10.13030	TevSTIB805.10.13670	Tb927.3.640	TevSTIB805.3.570
Tb927.10.13040	TevSTIB805.10.13690	Tb927.3.750	TevSTIB805.3.680
Tb927.10.13060	TevSTIB805.10.13700	Tb927.3.940	TevSTIB805.3.870
Tb927.10.13070	TevSTIB805.10.13710	Tb927.3.950	TevSTIB805.3.900
Tb927.10.13090	TevSTIB805.10.13730	Tb927.4.1130	TevSTIB805.4.1180
Tb927.10.1310	TevSTIB805.10.1420	Tb927.4.1280	TevSTIB805.4.1320
Tb927.10.13100	TevSTIB805.10.13740	Tb927.4.1370	TevSTIB805.4.1410
Tb927.10.13110	TevSTIB805.10.13750	Tb927.4.1420	TevSTIB805.4.1460
Tb927.10.13130	TevSTIB805.10.13770	Tb927.4.1440	TevSTIB805.4.1480
Tb927.10.13140	TevSTIB805.10.13780	Tb927.4.1530	TevSTIB805.4.1580
Tb927.10.13150	TevSTIB805.10.13790	Tb927.4.1540	TevSTIB805.4.1590
Tb927.10.13160	TevSTIB805.10.13800	Tb927.4.1590.1	TevSTIB805.4.1650
Tb927.10.13170	TevSTIB805.10.13810	Tb927.4.1600	TevSTIB805.4.1660
Tb927.10.13180	TevSTIB805.10.13820	Tb927.4.1610	TevSTIB805.4.1670
Tb927.10.13190	TevSTIB805.10.13830	Tb927.4.1650	TevSTIB805.4.1710
Tb927.10.1320	TevSTIB805.10.1430	Tb927.4.1670	TevSTIB805.4.1740
Tb927.10.13210	TevSTIB805.10.13850	Tb927.4.1760	TevSTIB805.4.1830
Tb927.10.13220	TevSTIB805.10.13860	Tb927.4.2250	TevSTIB805.4.2340
Tb927.10.13240	TevSTIB805.10.13880	Tb927.4.2320	TevSTIB805.4.2420
Tb927.10.13260	TevSTIB805.10.13900	Tb927.4.2360	TevSTIB805.4.2460
Tb927.10.13270	TevSTIB805.10.13910	Tb927.4.2430	TevSTIB805.4.2530
Tb927.10.13280	TevSTIB805.10.13920	Tb927.4.2440	TevSTIB805.4.2540
Tb927.10.13290	TevSTIB805.10.13930	Tb927.4.2530	TevSTIB805.4.2630
Tb927.10.1330	TevSTIB805.10.1440	Tb927.4.2580	TevSTIB805.4.2680
Tb927.10.13310	TevSTIB805.10.13950	Tb927.4.2930	TevSTIB805.4.3050
Tb927.10.13320	TevSTIB805.10.13960	Tb927.4.3070	TevSTIB805.4.3190
Tb927.10.13340	TevSTIB805.10.13980	Tb927.4.3080	TevSTIB805.4.3200
Tb927.10.13350	TevSTIB805.10.13990	Tb927.4.320	TevSTIB805.4.330
Tb927.10.13360	TevSTIB805.10.14000	Tb927.4.330	TevSTIB805.4.340
Tb927.10.13370	TevSTIB805.10.14010	Tb927.4.3300	TevSTIB805.4.3390
Tb927.10.13380	TevSTIB805.10.14020	Tb927.4.3450	TevSTIB805.4.3540
Tb927.10.13400	TevSTIB805.10.14040	Tb927.4.3660	TevSTIB805.4.3750
Tb927.10.13410	TevSTIB805.10.14060	Tb927.4.3800	TevSTIB805.4.3970
Tb927.10.13420	TevSTIB805.10.14070	Tb927.4.4210	TevSTIB805.4.4390
Tb927.10.13430	TevSTIB805.10.14080	Tb927.4.4300	TevSTIB805.4.4480
Tb927.10.13440	TevSTIB805.10.14090	Tb927.4.440	TevSTIB805.4.460
Tb927.10.13450	TevSTIB805.10.14100	Tb927.4.4620	TevSTIB805.4.4800
Tb927.10.13460	TevSTIB805.10.14110	Tb927.4.4830	TevSTIB805.4.5040
Tb927.10.13470	TevSTIB805.10.14120	Tb927.4.4910	TevSTIB805.4.5100
Tb927.10.13480	TevSTIB805.10.14130	Tb927.4.5120	TevSTIB805.4.5340
Tb927.10.13490	TevSTIB805.10.14140	Tb927.4.590	TevSTIB805.4.620
Tb927.10.1350	TevSTIB805.10.1460	Tb927.4.600	TevSTIB805.4.630
Tb927.10.13510	TevSTIB805.10.14160	Tb927.4.630	TevSTIB805.4.660
Tb927.10.13530	TevSTIB805.10.14190	Tb927.4.700	TevSTIB805.4.740
Tb927.10.13550	TevSTIB805.10.14210	Tb927.4.720	TevSTIB805.4.760
Tb927.10.13580	TevSTIB805.10.14260	Tb927.4.830	TevSTIB805.4.870
Tb927.10.1360	TevSTIB805.10.1470	Tb927.4.840	TevSTIB805.4.880
Tb927.10.13610	TevSTIB805.10.14300	Tb927.4.860	TevSTIB805.4.900
Tb927.10.13630	TevSTIB805.10.14320	Tb927.4.970	TevSTIB805.4.1020
Tb927.10.13640	TevSTIB805.10.14330	Tb927.5.1030	TevSTIB805.5.1160
Tb927.10.13650	TevSTIB805.10.14340	Tb927.5.1060	TevSTIB805.5.1190
Tb927.10.13660	TevSTIB805.10.14360	Tb927.5.1210	TevSTIB805.5.1370
Tb927.10.13670	TevSTIB805.10.14370	Tb927.5.1240	TevSTIB805.5.1400
Tb927.10.13680	TevSTIB805.10.14380	Tb927.5.1530	TevSTIB805.5.1720
Tb927.10.1370	TevSTIB805.10.1480	Tb927.5.1550	TevSTIB805.5.1740
Tb927.10.13700	TevSTIB805.10.14400	Tb927.5.1710	TevSTIB805.5.1920
Tb927.10.13710	TevSTIB805.10.14410	Tb927.5.1720	TevSTIB805.5.1940
Tb927.10.13720	TevSTIB805.10.14420	Tb927.5.2100	TevSTIB805.5.2420
Tb927.10.13730	TevSTIB805.10.14430	Tb927.5.2150	TevSTIB805.5.2480
Tb927.10.13740	TevSTIB805.10.14440	Tb927.5.2340	TevSTIB805.5.2730
Tb927.10.13750	TevSTIB805.10.14450	Tb927.5.2560	TevSTIB805.5.2970
Tb927.10.13760	TevSTIB805.10.14460	Tb927.5.2580	TevSTIB805.5.2990
Tb927.10.13790	TevSTIB805.10.14490	Tb927.5.2810	TevSTIB805.5.3250
Tb927.10.1380	TevSTIB805.10.1490	Tb927.5.2860	TevSTIB805.5.3300
Tb927.10.13800	TevSTIB805.10.14500	Tb927.5.2930	TevSTIB805.5.3380
Tb927.10.13810	TevSTIB805.10.14510	Tb927.5.3040	TevSTIB805.5.3510
Tb927.10.13840	TevSTIB805.10.14540	Tb927.5.3090	TevSTIB805.5.3560
Tb927.10.13860	TevSTIB805.10.14560	Tb927.5.3140	TevSTIB805.5.3620
Tb927.10.13870	TevSTIB805.10.14570	Tb927.5.320	TevSTIB805.5.300
Tb927.10.13880	TevSTIB805.10.14580	Tb927.5.3300	TevSTIB805.5.3790
Tb927.10.13890	TevSTIB805.10.14590	Tb927.5.3330	TevSTIB805.5.3830
Tb927.10.13900	TevSTIB805.10.14600	Tb927.5.3340	TevSTIB805.5.3840
Tb927.10.13910	TevSTIB805.10.14610	Tb927.5.3350	TevSTIB805.5.3850
Tb927.10.13920	TevSTIB805.10.14620	Tb927.5.3400	TevSTIB805.5.3900
Tb927.10.13930	TevSTIB805.10.14630	Tb927.5.3550	TevSTIB805.5.4070
Tb927.10.13940	TevSTIB805.10.14650	Tb927.5.4080	TevSTIB805.5.4640
Tb927.10.13950	TevSTIB805.10.14660	Tb927.5.440	TevSTIB805.5.420
Tb927.10.13960	TevSTIB805.10.14670	Tb927.5.450	TevSTIB805.5.440
Tb927.10.13970	TevSTIB805.10.14680	Tb927.5.510	TevSTIB805.5.500
Tb927.10.13980	TevSTIB805.10.14690	Tb927.5.530	TevSTIB805.5.520
Tb927.10.1400	TevSTIB805.10.1510	Tb927.5.560	TevSTIB805.5.550
Tb927.10.14000	TevSTIB805.10.14710	Tb927.5.630	TevSTIB805.5.650
Tb927.10.14010	TevSTIB805.10.14720	Tb927.5.740	TevSTIB805.5.850
Tb927.10.14020	TevSTIB805.10.14730	Tb927.5.770	TevSTIB805.5.880
Tb927.10.14030	TevSTIB805.10.14740	Tb927.5.920	TevSTIB805.5.1040
Tb927.10.14040	TevSTIB805.10.14750	Tb927.5.960	TevSTIB805.5.1090
Tb927.10.14050	TevSTIB805.10.14760	Tb927.5.980	TevSTIB805.5.1110
Tb927.10.14060	TevSTIB805.10.14770	Tb927.6.1200	TevSTIB805.6.1270
Tb927.10.14090	TevSTIB805.10.14810	Tb927.6.1410	TevSTIB805.6.1460
Tb927.10.1410	TevSTIB805.10.1520	Tb927.6.1450	TevSTIB805.6.1500
Tb927.10.14120	TevSTIB805.10.14850	Tb927.6.1590	TevSTIB805.6.1640
Tb927.10.14130	TevSTIB805.10.14860	Tb927.6.1630	TevSTIB805.6.1680
Tb927.10.14140	TevSTIB805.10.14870	Tb927.6.1700	TevSTIB805.6.1750
Tb927.10.14150	TevSTIB805.10.14880	Tb927.6.1840	TevSTIB805.6.1890
Tb927.10.14160	TevSTIB805.10.14890	Tb927.6.1860	TevSTIB805.6.1910
Tb927.10.14170	TevSTIB805.10.14910	Tb927.6.1890	TevSTIB805.6.1940
Tb927.10.14180	TevSTIB805.10.14920	Tb927.6.2010	TevSTIB805.6.2060
Tb927.10.14190	TevSTIB805.10.14930	Tb927.6.2190	TevSTIB805.6.2260
Tb927.10.1420	TevSTIB805.10.1530	Tb927.6.2320	TevSTIB805.6.2390
Tb927.10.14200	TevSTIB805.10.14940	Tb927.6.2380	TevSTIB805.6.2450
Tb927.10.14210	TevSTIB805.10.14950	Tb927.6.2490	TevSTIB805.6.2560
Tb927.10.14220	TevSTIB805.10.14960	Tb927.6.2510	TevSTIB805.6.2580
Tb927.10.14230	TevSTIB805.10.14970	Tb927.6.2630	TevSTIB805.6.2720
Tb927.10.14240	TevSTIB805.10.14980	Tb927.6.2790	TevSTIB805.6.2880
Tb927.10.14260	TevSTIB805.10.15000	Tb927.6.3350	TevSTIB805.6.3440
Tb927.10.14270	TevSTIB805.10.15020	Tb927.6.3360	TevSTIB805.6.3450
Tb927.10.1430	TevSTIB805.10.1540	Tb927.6.3420	TevSTIB805.6.3550
Tb927.10.14310	TevSTIB805.10.15060	Tb927.6.3610	TevSTIB805.6.3740
Tb927.10.14320	TevSTIB805.10.15070	Tb927.6.4070	TevSTIB805.6.4200
Tb927.10.14330	TevSTIB805.10.15080	Tb927.6.4130	TevSTIB805.6.4260
Tb927.10.14340	TevSTIB805.10.15090	Tb927.6.4210	TevSTIB805.6.4340
Tb927.10.14360	TevSTIB805.10.15110	Tb927.6.4500	TevSTIB805.6.4630
Tb927.10.14370	TevSTIB805.10.15120	Tb927.6.4510	TevSTIB805.6.4640
Tb927.10.14390	TevSTIB805.10.15140	Tb927.6.4540	TevSTIB805.6.4670
Tb927.10.14400	TevSTIB805.10.15150	Tb927.6.4700	TevSTIB805.6.4870
Tb927.10.14410	TevSTIB805.10.15160	Tb927.6.4990	TevSTIB805.6.5160
Tb927.10.14420	TevSTIB805.10.15170	Tb927.6.590	TevSTIB805.6.630
Tb927.10.14430	TevSTIB805.10.15180	Tb927.6.610	TevSTIB805.6.650
Tb927.10.14440	TevSTIB805.10.15190	Tb927.6.680	TevSTIB805.6.720
Tb927.10.14450	TevSTIB805.10.15200	Tb927.7.1010	TevSTIB805.7.980
Tb927.10.14460	TevSTIB805.10.15210	Tb927.7.1080	TevSTIB805.7.1050
Tb927.10.14480	TevSTIB805.10.15230	Tb927.7.1200	TevSTIB805.7.1190
Tb927.10.14490	TevSTIB805.10.15240	Tb927.7.1250	TevSTIB805.7.1260
Tb927.10.1450	TevSTIB805.10.1560	Tb927.7.1340	TevSTIB805.7.1330
Tb927.10.14500	TevSTIB805.10.15250	Tb927.7.1400	TevSTIB805.7.1410
Tb927.10.14510	TevSTIB805.10.15260	Tb927.7.1570	TevSTIB805.7.1600
Tb927.10.14520	TevSTIB805.10.15270	Tb927.7.1800	TevSTIB805.7.1830
Tb927.10.14530	TevSTIB805.10.15280	Tb927.7.2190	TevSTIB805.7.2260
Tb927.10.14560	TevSTIB805.10.15310	Tb927.7.2200	TevSTIB805.7.2270
Tb927.10.14570	TevSTIB805.10.15320	Tb927.7.2220	TevSTIB805.7.2280
Tb927.10.14580	TevSTIB805.11_01.5000	Tb927.7.2230	TevSTIB805.7.2290
Tb927.10.1460	TevSTIB805.10.1570	Tb927.7.2390	TevSTIB805.7.2460
Tb927.10.14610	TevSTIB805.10.15360	Tb927.7.2410	TevSTIB805.7.2480
Tb927.10.14640	TevSTIB805.10.15390	Tb927.7.2490	TevSTIB805.7.2570
Tb927.10.14650	TevSTIB805.10.15400	Tb927.7.2690	TevSTIB805.7.2780
Tb927.10.14660	TevSTIB805.10.15410	Tb927.7.2950	TevSTIB805.7.3060
Tb927.10.14670	TevSTIB805.10.15420	Tb927.7.3100	TevSTIB805.7.3240
Tb927.10.14680	TevSTIB805.10.15430	Tb927.7.3140	TevSTIB805.7.3280
Tb927.10.14690	TevSTIB805.10.15440	Tb927.7.3200	TevSTIB805.7.3350
Tb927.10.14700	TevSTIB805.10.15450	Tb927.7.3270	TevSTIB805.7.3450
Tb927.10.14720	TevSTIB805.10.15470	Tb927.7.3340	TevSTIB805.7.3510
Tb927.10.14730	TevSTIB805.10.15480	Tb927.7.3470	TevSTIB805.7.3640
Tb927.10.14740	TevSTIB805.10.15490	Tb927.7.3520	TevSTIB805.7.3690
Tb927.10.14760	TevSTIB805.10.15510	Tb927.7.3590	TevSTIB805.7.3770
Tb927.10.14770	TevSTIB805.10.15520	Tb927.7.3750	TevSTIB805.7.3950
Tb927.10.14780	TevSTIB805.10.15530	Tb927.7.3770	TevSTIB805.7.3970
Tb927.10.14790	TevSTIB805.10.15540	Tb927.7.3810	TevSTIB805.7.4010
Tb927.10.1480	TevSTIB805.10.1590	Tb927.7.3890	TevSTIB805.7.4110
Tb927.10.14800	TevSTIB805.10.15560	Tb927.7.3910	TevSTIB805.7.4140
Tb927.10.14810	TevSTIB805.10.15570	Tb927.7.3940	TevSTIB805.7.4180
Tb927.10.14820	TevSTIB805.10.15600	Tb927.7.4050	TevSTIB805.7.4330
Tb927.10.14850	TevSTIB805.10.15610	Tb927.7.4200	TevSTIB805.7.4520
Tb927.10.14870	TevSTIB805.10.15630	Tb927.7.4310	TevSTIB805.7.4660
Tb927.10.14880	TevSTIB805.10.15640	Tb927.7.4320	TevSTIB805.7.4670
Tb927.10.14890	TevSTIB805.10.15650	Tb927.7.4440	TevSTIB805.7.4790
Tb927.10.1490	TevSTIB805.10.1600	Tb927.7.4470	TevSTIB805.7.4820
Tb927.10.14900	TevSTIB805.10.15660	Tb927.7.4620	TevSTIB805.7.4970
Tb927.10.14910	TevSTIB805.10.15670	Tb927.7.4810	TevSTIB805.7.5200
Tb927.10.14920	TevSTIB805.10.15680	Tb927.7.4890	TevSTIB805.7.5300
Tb927.10.14960	TevSTIB805.10.15730	Tb927.7.5110	TevSTIB805.7.5550
Tb927.10.14970	TevSTIB805.10.15750	Tb927.7.5130	TevSTIB805.7.5570
Tb927.10.14980	TevSTIB805.10.15760	Tb927.7.5260	TevSTIB805.7.5720
Tb927.10.150	TevSTIB805.10.190	Tb927.7.5280	TevSTIB805.7.5740
Tb927.10.1500	TevSTIB805.10.1610	Tb927.7.5320	TevSTIB805.7.5800
Tb927.10.15000	TevSTIB805.10.15780	Tb927.7.5330	TevSTIB805.7.5810
Tb927.10.15020	TevSTIB805.10.15810	Tb927.7.5440	TevSTIB805.7.5960
Tb927.10.15040	TevSTIB805.10.15840	Tb927.7.5630	TevSTIB805.7.6170
Tb927.10.15050	TevSTIB805.10.15850	Tb927.7.5680	TevSTIB805.7.6230
Tb927.10.15090	TevSTIB805.10.15890	Tb927.7.5700	TevSTIB805.7.6250
Tb927.10.1510	TevSTIB805.10.1620	Tb927.7.5820	TevSTIB805.7.6390
Tb927.10.15100	TevSTIB805.10.15900	Tb927.7.5970	TevSTIB805.7.6570
Tb927.10.15110	TevSTIB805.10.15910	Tb927.7.6200	TevSTIB805.7.6780
Tb927.10.15120	TevSTIB805.2.3370	Tb927.7.630	TevSTIB805.7.570
Tb927.10.15130	TevSTIB805.10.15930	Tb927.7.6350	TevSTIB805.7.6930
Tb927.10.15140	TevSTIB805.10.15940	Tb927.7.640	TevSTIB805.7.580
Tb927.10.15150	TevSTIB805.10.15950	Tb927.7.6410	TevSTIB805.7.7000
Tb927.10.15160	TevSTIB805.10.15960	Tb927.7.6990	TevSTIB805.7.7720
Tb927.10.15170	TevSTIB805.10.15970	Tb927.7.7080	TevSTIB805.7.7820
Tb927.10.15180	TevSTIB805.10.15980	Tb927.7.7330	TevSTIB805.7.8060
Tb927.10.15190	TevSTIB805.10.15990	Tb927.7.7410	TevSTIB805.7.8140
Tb927.10.15200	TevSTIB805.10.16000	Tb927.7.7440	TevSTIB805.7.8170
Tb927.10.15210	TevSTIB805.10.16010	Tb927.7.7470	TevSTIB805.7.8210
Tb927.10.15220	TevSTIB805.10.16020	Tb927.7.840	TevSTIB805.7.790
Tb927.10.15230	TevSTIB805.10.16030	Tb927.7.870	TevSTIB805.7.820
Tb927.10.15240	TevSTIB805.10.16040	Tb927.7.900	TevSTIB805.7.850
Tb927.10.15260	TevSTIB805.10.16060	Tb927.7.910	TevSTIB805.7.860
Tb927.10.15270	TevSTIB805.10.16070	Tb927.8.1060	TevSTIB805.8.960
Tb927.10.15280	TevSTIB805.10.16080	Tb927.8.1240	TevSTIB805.8.1140
Tb927.10.15290	TevSTIB805.10.16090	Tb927.8.1420	TevSTIB805.8.1330
Tb927.10.1530	TevSTIB805.10.1640	Tb927.8.1490	TevSTIB805.8.1400
Tb927.10.15300	TevSTIB805.10.16100	Tb927.8.1580	TevSTIB805.8.1510
Tb927.10.15310	TevSTIB805.10.16110	Tb927.8.1740	TevSTIB805.8.1670
Tb927.10.15320	TevSTIB805.10.16130	Tb927.8.1770	TevSTIB805.8.1700
Tb927.10.15330	TevSTIB805.10.16140	Tb927.8.1860	TevSTIB805.8.1790
Tb927.10.15380	TevSTIB805.10.16190	Tb927.8.1890	TevSTIB805.8.1820
Tb927.10.1540	TevSTIB805.10.1650	Tb927.8.1990	TevSTIB805.8.1930
Tb927.10.15400	TevSTIB805.10.16220	Tb927.8.2290	TevSTIB805.8.2230
Tb927.10.15410	TevSTIB805.10.16230	Tb927.8.2300	TevSTIB805.8.2240
Tb927.10.15430	TevSTIB805.10.16250	Tb927.8.2460	TevSTIB805.8.2400
Tb927.10.15440	TevSTIB805.10.16260	Tb927.8.2470	TevSTIB805.8.2410
Tb927.10.15450	TevSTIB805.10.16270	Tb927.8.2530	TevSTIB805.8.2490
Tb927.10.15460	TevSTIB805.10.16290	Tb927.8.2540	TevSTIB805.8.2500
Tb927.10.15480	TevSTIB805.10.16320	Tb927.8.2650	TevSTIB805.8.2620
Tb927.10.15490	TevSTIB805.10.16330	Tb927.8.2670	TevSTIB805.8.2640
Tb927.10.1550	TevSTIB805.10.1660	Tb927.8.2680	TevSTIB805.8.2650
Tb927.10.15500	TevSTIB805.10.16340	Tb927.8.2880	TevSTIB805.8.2920
Tb927.10.15510	TevSTIB805.10.16350	Tb927.8.3070	TevSTIB805.8.3150
Tb927.10.15520	TevSTIB805.10.16360	Tb927.8.3090	TevSTIB805.8.3170
Tb927.10.15530	TevSTIB805.10.16370	Tb927.8.3260	TevSTIB805.8.3350
Tb927.10.15540	TevSTIB805.10.16380	Tb927.8.3330	TevSTIB805.8.3420
Tb927.10.15550	TevSTIB805.10.16390	Tb927.8.3450	TevSTIB805.8.3550
Tb927.10.15560	TevSTIB805.10.16400	Tb927.8.3690	TevSTIB805.8.3800
Tb927.10.15570	TevSTIB805.10.16410	Tb927.8.3830	TevSTIB805.8.3940
Tb927.10.15590	TevSTIB805.10.16430	Tb927.8.3960	TevSTIB805.8.4080
Tb927.10.1560	TevSTIB805.10.1670	Tb927.8.4000	TevSTIB805.8.4120
Tb927.10.15600	TevSTIB805.10.16440	Tb927.8.4050	TevSTIB805.8.4220
Tb927.10.15610	TevSTIB805.10.16450	Tb927.8.4150	TevSTIB805.8.4270
Tb927.10.15640	TevSTIB805.10.16470	Tb927.8.4230	TevSTIB805.8.4360
Tb927.10.15670	TevSTIB805.10.16500	Tb927.8.4240	TevSTIB805.8.4370
Tb927.10.15690	TevSTIB805.10.16520	Tb927.8.4250	TevSTIB805.8.4380
Tb927.10.1570	TevSTIB805.10.1680	Tb927.8.4370	TevSTIB805.8.4510
Tb927.10.15720	TevSTIB805.10.16550	Tb927.8.4380	TevSTIB805.8.4520
Tb927.10.15730	TevSTIB805.10.16560	Tb927.8.4440	TevSTIB805.8.4580
Tb927.10.15740	TevSTIB805.10.16580	Tb927.8.4690	TevSTIB805.8.4840
Tb927.10.15750	TevSTIB805.10.16590	Tb927.8.4920	TevSTIB805.8.5100
Tb927.10.15760	TevSTIB805.10.16600	Tb927.8.4930	TevSTIB805.8.5110
Tb927.10.15770	TevSTIB805.10.16610	Tb927.8.5100	TevSTIB805.8.5280
Tb927.10.15790	TevSTIB805.10.16630	Tb927.8.5120	TevSTIB805.8.5300
Tb927.10.1580	TevSTIB805.10.1690	Tb927.8.5220	TevSTIB805.8.5410
Tb927.10.15800	TevSTIB805.10.16640	Tb927.8.5310	TevSTIB805.8.5520
Tb927.10.15810	TevSTIB805.10.16650	Tb927.8.5370	TevSTIB805.8.5590
Tb927.10.15820	TevSTIB805.10.16660	Tb927.8.5420	TevSTIB805.8.5650
Tb927.10.15840	TevSTIB805.10.16680	Tb927.8.5560	TevSTIB805.8.5810
Tb927.10.15850	TevSTIB805.10.16690	Tb927.8.5610	TevSTIB805.8.5870
Tb927.10.15860	TevSTIB805.10.16700	Tb927.8.5640	TevSTIB805.8.5900
Tb927.10.15870	TevSTIB805.10.16710	Tb927.8.5660	TevSTIB805.8.5920
Tb927.10.15880	TevSTIB805.10.16720	Tb927.8.580	TevSTIB805.8.480
Tb927.10.15890	TevSTIB805.10.16730	Tb927.8.6040	TevSTIB805.8.6300
Tb927.10.1590	TevSTIB805.10.1700	Tb927.8.6060	TevSTIB805.8.6320
Tb927.10.15900	TevSTIB805.10.16740	Tb927.8.6080	TevSTIB805.8.6340
Tb927.10.15910	TevSTIB805.10.16750	Tb927.8.6110	TevSTIB805.8.6380
Tb927.10.15920	TevSTIB805.10.16760	Tb927.8.6120	TevSTIB805.8.6400
Tb927.10.15940	TevSTIB805.10.16780	Tb927.8.630	TevSTIB805.8.530
Tb927.10.15950	TevSTIB805.10.16790	Tb927.8.6410	TevSTIB805.8.6700
Tb927.10.15960	TevSTIB805.10.16800	Tb927.8.6480	TevSTIB805.8.6770
Tb927.10.15970	TevSTIB805.10.16810	Tb927.8.6520	TevSTIB805.8.6820
Tb927.10.15990	TevSTIB805.10.16830	Tb927.8.6560	TevSTIB805.8.6860
Tb927.10.160	TevSTIB805.10.200	Tb927.8.6580	TevSTIB805.8.6900
Tb927.10.1600	TevSTIB805.10.1710	Tb927.8.6640	TevSTIB805.8.6960
Tb927.10.16000	TevSTIB805.10.16840	Tb927.8.6800	TevSTIB805.8.7120
Tb927.10.16020	TevSTIB805.10.16880	Tb927.8.6820	TevSTIB805.8.7140
Tb927.10.16040	TevSTIB805.10.16900	Tb927.8.6890	TevSTIB805.8.7210
Tb927.10.16050	TevSTIB805.10.16910	Tb927.8.6970	TevSTIB805.8.7290
Tb927.10.16060	TevSTIB805.10.16920	Tb927.8.7040	TevSTIB805.8.7380
Tb927.10.16070	TevSTIB805.10.16930	Tb927.8.7170	TevSTIB805.8.7510
Tb927.10.16080	TevSTIB805.10.16940	Tb927.8.7530	TevSTIB805.8.7920
Tb927.10.1610	TevSTIB805.10.1720	Tb927.8.7600	TevSTIB805.8.7990
Tb927.10.16100	TevSTIB805.10.16960	Tb927.8.7640	TevSTIB805.8.8030
Tb927.10.16110	TevSTIB805.10.16970	Tb927.8.7670	TevSTIB805.8.8050
Tb927.10.16120	TevSTIB805.10.16980	Tb927.8.7770	TevSTIB805.8.8240
Tb927.10.16130	TevSTIB805.10.16990	Tb927.9.10010	TevSTIB805.9.7160
Tb927.10.16140	TevSTIB805.10.17000	Tb927.9.10050	TevSTIB805.9.7180
Tb927.10.16150	TevSTIB805.10.17010	Tb927.9.10070	TevSTIB805.9.7200
Tb927.10.16160	TevSTIB805.10.17020	Tb927.9.10160	TevSTIB805.9.7260
Tb927.10.16180	TevSTIB805.10.17040	Tb927.9.10310	TevSTIB805.9.7360
Tb927.10.16190	TevSTIB805.10.17050	Tb927.9.10470	TevSTIB805.9.7470
Tb927.10.1620	TevSTIB805.10.1730	Tb927.9.10500	TevSTIB805.9.7500
Tb927.10.1630	TevSTIB805.10.1740	Tb927.9.10520	TevSTIB805.9.7520
Tb927.10.16300	TevSTIB805.10.17210	Tb927.9.10560	TevSTIB805.9.7560
Tb927.10.1640	TevSTIB805.10.1750	Tb927.9.10580	TevSTIB805.9.7580
Tb927.10.170	TevSTIB805.10.210	Tb927.9.10630	TevSTIB805.9.7620
Tb927.10.1700	TevSTIB805.10.1820	Tb927.9.10640	TevSTIB805.9.7630
Tb927.10.1710	TevSTIB805.10.1830	Tb927.9.11040	TevSTIB805.9.7880
Tb927.10.1720	TevSTIB805.10.1840	Tb927.9.11220	TevSTIB805.9.8040
Tb927.10.1740	TevSTIB805.10.1860	Tb927.9.11260	TevSTIB805.9.8070
Tb927.10.1750	TevSTIB805.10.1870	Tb927.9.11350	TevSTIB805.9.8110
Tb927.10.1760	TevSTIB805.10.1880	Tb927.9.11510	TevSTIB805.9.8200
Tb927.10.1770	TevSTIB805.10.1900	Tb927.9.11560	TevSTIB805.9.8250
Tb927.10.1780	TevSTIB805.10.1910	Tb927.9.11910	TevSTIB805.9.8540
Tb927.10.1800	TevSTIB805.10.1930	Tb927.9.12120	TevSTIB805.9.8700
Tb927.10.1820	TevSTIB805.10.1950	Tb927.9.12160	TevSTIB805.9.8720
Tb927.10.1830	TevSTIB805.10.1970	Tb927.9.12500	TevSTIB805.9.8970
Tb927.10.1840	TevSTIB805.10.1980	Tb927.9.12710	TevSTIB805.9.9110
Tb927.10.1850	TevSTIB805.10.1990	Tb927.9.12720	TevSTIB805.9.9120
Tb927.10.1860	TevSTIB805.10.2000	Tb927.9.12750	TevSTIB805.9.9150
Tb927.10.1880	TevSTIB805.10.2020	Tb927.9.12770	TevSTIB805.9.9170
Tb927.10.1890	TevSTIB805.10.2030	Tb927.9.13010	TevSTIB805.9.9350
Tb927.10.190	TevSTIB805.10.230	Tb927.9.13120	TevSTIB805.9.9440
Tb927.10.1910	TevSTIB805.10.2050	Tb927.9.13130	TevSTIB805.9.9450
Tb927.10.1940	TevSTIB805.10.2080	Tb927.9.13540	TevSTIB805.9.9810
Tb927.10.1960	TevSTIB805.10.2100	Tb927.9.13580	TevSTIB805.9.9830
Tb927.10.1970	TevSTIB805.10.2110	Tb927.9.13630	TevSTIB805.9.9880
Tb927.10.1980	TevSTIB805.10.2120	Tb927.9.1380	TevSTIB805.9.1090
Tb927.10.1990	TevSTIB805.10.2130	Tb927.9.14160	TevSTIB805.9.10120
Tb927.10.200	TevSTIB805.10.240	Tb927.9.14200	TevSTIB805.9.10160
Tb927.10.2000	TevSTIB805.10.2140	Tb927.9.15010	TevSTIB805.9.10600
Tb927.10.2010	TevSTIB805.10.2150	Tb927.9.15240	TevSTIB805.9.10750
Tb927.10.2020	TevSTIB805.10.2160	Tb927.9.15270	TevSTIB805.9.10770
Tb927.10.2030	TevSTIB805.10.2170	Tb927.9.15380	TevSTIB805.9.10850
Tb927.10.2040	TevSTIB805.10.2190	Tb927.9.1650	TevSTIB805.9.1280
Tb927.10.2060	TevSTIB805.10.2220	Tb927.9.1950	TevSTIB805.9.1460
Tb927.10.2080	TevSTIB805.10.2240	Tb927.9.2110	TevSTIB805.9.1590
Tb927.10.210	TevSTIB805.10.250	Tb927.9.2270	TevSTIB805.9.1710
Tb927.10.2110	TevSTIB805.10.2270	Tb927.9.2320	TevSTIB805.9.1760
Tb927.10.2120	TevSTIB805.10.2280	Tb927.9.2450	TevSTIB805.9.1830
Tb927.10.2130	TevSTIB805.10.2290	Tb927.9.2620	TevSTIB805.9.1950
Tb927.10.2140	TevSTIB805.10.2300	Tb927.9.3170	TevSTIB805.9.2330
Tb927.10.2150	TevSTIB805.10.2310	Tb927.9.3410	TevSTIB805.9.2530
Tb927.10.2160	TevSTIB805.10.2320	Tb927.9.3470	TevSTIB805.9.2560
Tb927.10.2170	TevSTIB805.10.2330	Tb927.9.3540	TevSTIB805.9.2620
Tb927.10.2180	TevSTIB805.10.2340	Tb927.9.3600	TevSTIB805.9.2680
Tb927.10.2190	TevSTIB805.10.2350	Tb927.9.3770	TevSTIB805.9.2810
Tb927.10.2200	TevSTIB805.10.2360	Tb927.9.3780	TevSTIB805.9.2820
Tb927.10.2210	TevSTIB805.10.2370	Tb927.9.4310	TevSTIB805.9.3150
Tb927.10.2220	TevSTIB805.10.2380	Tb927.9.4500	TevSTIB805.9.3280
Tb927.10.2240	TevSTIB805.10.2400	Tb927.9.4520	TevSTIB805.9.3290
Tb927.10.2250	TevSTIB805.10.2410	Tb927.9.4630	TevSTIB805.9.3390
Tb927.10.2260	TevSTIB805.10.2420	Tb927.9.4660	TevSTIB805.9.3420
Tb927.10.2270	TevSTIB805.10.2430	Tb927.9.4810	TevSTIB805.9.3510
Tb927.10.2290	TevSTIB805.10.2460	Tb927.9.5000	TevSTIB805.9.3680
Tb927.10.230	TevSTIB805.10.270	Tb927.9.5020	TevSTIB805.9.3690
Tb927.10.2310	TevSTIB805.10.2480	Tb927.9.5330	TevSTIB805.9.3910
Tb927.10.2320	TevSTIB805.10.2490	Tb927.9.5890	TevSTIB805.9.4280
Tb927.10.2330	TevSTIB805.10.2500	Tb927.9.5900	TevSTIB805.9.4290
Tb927.10.2340	TevSTIB805.10.2510	Tb927.9.5960	TevSTIB805.9.4320
Tb927.10.2370	TevSTIB805.10.2540	Tb927.9.6060	TevSTIB805.9.4370
Tb927.10.2380	TevSTIB805.10.2550	Tb927.9.6270	TevSTIB805.9.4490
Tb927.10.2390	TevSTIB805.10.2560	Tb927.9.6620	TevSTIB805.9.4740
Tb927.10.240	TevSTIB805.10.280	Tb927.9.6910	TevSTIB805.9.4960
Tb927.10.2400	TevSTIB805.10.2580	Tb927.9.7020	TevSTIB805.9.5030
Tb927.10.2420	TevSTIB805.10.2600	Tb927.9.7190	TevSTIB805.9.5190
Tb927.10.2430	TevSTIB805.10.2610	Tb927.9.7200	TevSTIB805.9.5200
Tb927.10.2450	TevSTIB805.10.2640	Tb927.9.7470	TevSTIB805.9.5400
Tb927.10.2470	TevSTIB805.10.2660	Tb927.9.7830	TevSTIB805.9.5660
Tb927.10.2480	TevSTIB805.10.2670	Tb927.9.8260	TevSTIB805.9.5910
Tb927.10.2490	TevSTIB805.10.2690	Tb927.9.8410	TevSTIB805.9.6020
Tb927.10.250	TevSTIB805.10.290	Tb927.9.8580	TevSTIB805.9.6140
Tb927.10.2500	TevSTIB805.10.2700	Tb927.9.8710	TevSTIB805.9.6220
Tb927.10.2510	TevSTIB805.10.2710	Tb927.9.8950	TevSTIB805.9.6350
Tb927.10.2520	TevSTIB805.10.2720	Tb927.9.9080	TevSTIB805.9.6430
Tb927.10.2530	TevSTIB805.10.2730	Tb927.9.9310	TevSTIB805.9.6630
Tb927.10.2540	TevSTIB805.10.2750	Tb927.9.9420	TevSTIB805.9.6730
Tb927.10.2550	TevSTIB805.10.2760	Tb927.9.9660	TevSTIB805.9.6910
Tb927.10.2570	TevSTIB805.10.2780	Tb927.9.9700	TevSTIB805.9.6940
Tb927.10.2580	TevSTIB805.10.2790	Tb927.9.9840	TevSTIB805.9.7040
Tb927.10.260	TevSTIB805.10.300
Tb927.10.2600	TevSTIB805.10.2810
Tb927.10.2610	TevSTIB805.10.2830
Tb927.10.2620	TevSTIB805.10.2840
Tb927.10.2630	TevSTIB805.10.2850
Tb927.10.2640	TevSTIB805.10.2860
Tb927.10.2650	TevSTIB805.10.2870
Tb927.10.2660	TevSTIB805.10.2880
Tb927.10.2670	TevSTIB805.10.2890
Tb927.10.2690	TevSTIB805.10.2910
Tb927.10.270	TevSTIB805.10.310
Tb927.10.2700	TevSTIB805.10.2920
Tb927.10.2710	TevSTIB805.10.2930
Tb927.10.2720	TevSTIB805.10.2940
Tb927.10.2730	TevSTIB805.10.2950
Tb927.10.2740	TevSTIB805.10.2960
Tb927.10.2750	TevSTIB805.10.2980
Tb927.10.2760	TevSTIB805.10.2990
Tb927.10.2770	TevSTIB805.10.3000
Tb927.10.2780	TevSTIB805.10.3010
Tb927.10.2790	TevSTIB805.10.3020
Tb927.10.2810	TevSTIB805.10.3040
Tb927.10.2820	TevSTIB805.10.3050
Tb927.10.2830	TevSTIB805.10.3060
Tb927.10.2840	TevSTIB805.3.1340
Tb927.10.2850	TevSTIB805.10.3080
Tb927.10.2860	TevSTIB805.10.3090
Tb927.10.2870	TevSTIB805.10.3110
Tb927.10.2880	TevSTIB805.10.3120
Tb927.10.2890	TevSTIB805.10.3130
Tb927.10.2900	TevSTIB805.10.3140
Tb927.10.2910	TevSTIB805.10.3150
Tb927.10.2920	TevSTIB805.10.3160
Tb927.10.2930	TevSTIB805.10.3170
Tb927.10.2940	TevSTIB805.10.3180
Tb927.10.2960	TevSTIB805.10.3200
Tb927.10.2990	TevSTIB805.10.3230
Tb927.10.300	TevSTIB805.10.340
Tb927.10.3000	TevSTIB805.10.3240
Tb927.10.3010	TevSTIB805.10.3250
Tb927.10.3020	TevSTIB805.10.3260
Tb927.10.3030	TevSTIB805.10.3270
Tb927.10.3050	TevSTIB805.10.3290
Tb927.10.3070	TevSTIB805.10.3320
Tb927.10.3090	TevSTIB805.10.3340
Tb927.10.3100	TevSTIB805.10.3350
Tb927.10.3110	TevSTIB805.10.3360
Tb927.10.3130	TevSTIB805.10.3380
Tb927.10.3150	TevSTIB805.10.3400
Tb927.10.3160	TevSTIB805.10.3410
Tb927.10.3170	TevSTIB805.10.3420
Tb927.10.3180	TevSTIB805.10.3430
Tb927.10.3190	TevSTIB805.10.3440
Tb927.10.320	TevSTIB805.10.360
Tb927.10.3200	TevSTIB805.10.3450
Tb927.10.3220	TevSTIB805.10.3470
Tb927.10.3230	TevSTIB805.10.3480
Tb927.10.3260	TevSTIB805.10.3510
Tb927.10.3270	TevSTIB805.10.3520
Tb927.10.3280	TevSTIB805.10.3530
Tb927.10.3290	TevSTIB805.10.3540
Tb927.10.330	TevSTIB805.10.370
Tb927.10.3300	TevSTIB805.10.3550
Tb927.10.3310	TevSTIB805.10.3560
Tb927.10.3330	TevSTIB805.10.3580
Tb927.10.3340	TevSTIB805.10.3590
Tb927.10.3350	TevSTIB805.10.3600
Tb927.10.3360	TevSTIB805.10.3610
Tb927.10.3380	TevSTIB805.10.3630
Tb927.10.3390	TevSTIB805.10.3640
Tb927.10.3400	TevSTIB805.10.3650
Tb927.10.3410	TevSTIB805.10.3660
Tb927.10.3430	TevSTIB805.10.3680
Tb927.10.3470	TevSTIB805.10.3700
Tb927.10.3480	TevSTIB805.10.3710
Tb927.10.3490	TevSTIB805.10.3720
Tb927.10.3500	TevSTIB805.10.3730
Tb927.10.3520	TevSTIB805.10.3750
Tb927.10.3530	TevSTIB805.10.3760
Tb927.10.3540	TevSTIB805.10.3770
Tb927.10.3550	TevSTIB805.10.3780
Tb927.10.3560	TevSTIB805.10.3790
Tb927.10.360	TevSTIB805.10.400
Tb927.10.3620	TevSTIB805.10.3850
Tb927.10.3640	TevSTIB805.10.3870
Tb927.10.3650	TevSTIB805.10.3880
Tb927.10.3660	TevSTIB805.10.3890
Tb927.10.3680	TevSTIB805.10.3910
Tb927.10.370	TevSTIB805.10.410
Tb927.10.3700	TevSTIB805.10.3930
Tb927.10.3710	TevSTIB805.10.3940
Tb927.10.3720	TevSTIB805.10.3950
Tb927.10.3730	TevSTIB805.10.3960
Tb927.10.3750	TevSTIB805.10.3980
Tb927.10.3760	TevSTIB805.10.3990
Tb927.10.3780	TevSTIB805.10.4010
Tb927.10.3790	TevSTIB805.10.4020
Tb927.10.3800	TevSTIB805.10.4030
Tb927.10.3810	TevSTIB805.10.4040
Tb927.10.3820	TevSTIB805.10.4050
Tb927.10.3830	TevSTIB805.10.4060
Tb927.10.3850	TevSTIB805.10.4090
Tb927.10.3860	TevSTIB805.10.4100
Tb927.10.3880	TevSTIB805.10.4130
Tb927.10.390	TevSTIB805.10.430
Tb927.10.3900	TevSTIB805.10.4150
Tb927.10.3910	TevSTIB805.10.4160
Tb927.10.3920	TevSTIB805.10.4170
Tb927.10.3940	TevSTIB805.10.4190
Tb927.10.3960	TevSTIB805.10.4210
Tb927.10.3970	TevSTIB805.10.4230
Tb927.10.3980	TevSTIB805.10.4240
Tb927.10.3990	TevSTIB805.10.4260
Tb927.10.400	TevSTIB805.10.440
Tb927.10.4010	TevSTIB805.10.4280
Tb927.10.4040	TevSTIB805.10.4300
Tb927.10.4050	TevSTIB805.10.4320
Tb927.10.4060	TevSTIB805.10.4330
Tb927.10.4070	TevSTIB805.10.4340
Tb927.10.4090	TevSTIB805.10.4360
Tb927.10.410	TevSTIB805.10.450
Tb927.10.4100	TevSTIB805.10.4370
Tb927.10.4120	TevSTIB805.10.4380
Tb927.10.4140	TevSTIB805.10.4400
Tb927.10.4160	TevSTIB805.10.4420
Tb927.10.4170	TevSTIB805.10.4430
Tb927.10.4180	TevSTIB805.10.4440
Tb927.10.4190	TevSTIB805.10.4450
Tb927.10.420	TevSTIB805.10.460
Tb927.10.4200	TevSTIB805.10.4460
Tb927.10.4210	TevSTIB805.10.4470
Tb927.10.4260	TevSTIB805.10.4520
Tb927.10.4270	TevSTIB805.10.4530
Tb927.10.4290	TevSTIB805.10.4560
Tb927.10.4300	TevSTIB805.10.4570
Tb927.10.4320	TevSTIB805.10.4600
Tb927.10.4330	TevSTIB805.10.4620
Tb927.10.4350	TevSTIB805.10.4640
Tb927.10.4360	TevSTIB805.10.4650
Tb927.10.4370	TevSTIB805.10.4660
Tb927.10.4390	TevSTIB805.10.4680
Tb927.10.440	TevSTIB805.10.480
Tb927.10.4400	TevSTIB805.10.4690
Tb927.10.4410	TevSTIB805.10.4700
Tb927.10.4420	TevSTIB805.10.4710
Tb927.10.4440	TevSTIB805.10.4730
Tb927.10.4460	TevSTIB805.10.4750
Tb927.10.4480	TevSTIB805.10.4770
Tb927.10.450	TevSTIB805.10.490
Tb927.10.4530	TevSTIB805.10.4820
Tb927.10.4540	TevSTIB805.10.4830
Tb927.10.4570	TevSTIB805.10.4860
Tb927.10.4580	TevSTIB805.10.4870
Tb927.10.460	TevSTIB805.10.500
Tb927.10.4610	TevSTIB805.10.4900
Tb927.10.4620	TevSTIB805.10.4910
Tb927.10.4630	TevSTIB805.10.4920
Tb927.10.4640	TevSTIB805.10.4930
Tb927.10.4650	TevSTIB805.10.4940
Tb927.10.4660	TevSTIB805.10.4950
Tb927.10.4670	TevSTIB805.10.4960
Tb927.10.4680	TevSTIB805.10.4970
Tb927.10.4690	TevSTIB805.10.4980
Tb927.10.4700	TevSTIB805.10.4990
Tb927.10.4710	TevSTIB805.10.5000
Tb927.10.4720	TevSTIB805.10.5010
Tb927.10.4730	TevSTIB805.10.5020
Tb927.10.4740	TevSTIB805.10.5030
Tb927.10.4750	TevSTIB805.10.5040
Tb927.10.4760	TevSTIB805.10.5050
Tb927.10.4790	TevSTIB805.10.5080
Tb927.10.480	TevSTIB805.10.520
Tb927.10.4810	TevSTIB805.10.5100
Tb927.10.4820	TevSTIB805.10.5110
Tb927.10.4830	TevSTIB805.10.5120
Tb927.10.4840	TevSTIB805.10.5130
Tb927.10.4860	TevSTIB805.10.5150
Tb927.10.4870	TevSTIB805.10.5160
Tb927.10.490	TevSTIB805.10.530
Tb927.10.4900	TevSTIB805.10.5190
Tb927.10.4920	TevSTIB805.10.5210
Tb927.10.4940	TevSTIB805.10.5230
Tb927.10.4950	TevSTIB805.10.5240
Tb927.10.4960	TevSTIB805.10.5250
Tb927.10.4970	TevSTIB805.10.5260
Tb927.10.4980	TevSTIB805.10.5270
Tb927.10.5000	TevSTIB805.10.5290
Tb927.10.5020	TevSTIB805.10.5310
Tb927.10.5030	TevSTIB805.10.5320
Tb927.10.5040	TevSTIB805.10.5330
Tb927.10.5070	TevSTIB805.10.5360
Tb927.10.5080	TevSTIB805.10.5370
Tb927.10.5090	TevSTIB805.10.5380
Tb927.10.5100	TevSTIB805.10.5390
Tb927.10.5130	TevSTIB805.10.5420
Tb927.10.5140	TevSTIB805.10.5430
Tb927.10.5150	TevSTIB805.10.5440
Tb927.10.5170	TevSTIB805.10.5460
Tb927.10.5180	TevSTIB805.10.5480
Tb927.10.5190	TevSTIB805.10.5490
Tb927.10.5200	TevSTIB805.10.5500
Tb927.10.5210	TevSTIB805.10.5510
Tb927.10.5230	TevSTIB805.10.5530
Tb927.10.5240	TevSTIB805.10.5540
Tb927.10.5250	TevSTIB805.10.5550
Tb927.10.5260	TevSTIB805.10.5580
Tb927.10.5270	TevSTIB805.10.5590
Tb927.10.5280	TevSTIB805.10.5600
Tb927.10.5290	TevSTIB805.10.5610
Tb927.10.530	TevSTIB805.10.570
Tb927.10.5300	TevSTIB805.10.5620
Tb927.10.5310	TevSTIB805.10.5630
Tb927.10.5330	TevSTIB805.10.5670
Tb927.10.5350	TevSTIB805.10.5680
Tb927.10.5370	TevSTIB805.10.5710
Tb927.10.5380	TevSTIB805.10.5720
Tb927.10.540	TevSTIB805.10.580
Tb927.10.5410	TevSTIB805.10.5750
Tb927.10.5420	TevSTIB805.10.5760
Tb927.10.5430	TevSTIB805.10.5770
Tb927.10.5450	TevSTIB805.10.5790
Tb927.10.5470	TevSTIB805.10.5810
Tb927.10.5480	TevSTIB805.10.5820
Tb927.10.5490	TevSTIB805.10.5830
Tb927.10.550	TevSTIB805.10.590
Tb927.10.5510	TevSTIB805.10.5850
Tb927.10.5520	TevSTIB805.10.5860
Tb927.10.5530	TevSTIB805.10.5870
Tb927.10.5550	TevSTIB805.10.5890
Tb927.10.5560	TevSTIB805.10.5900
Tb927.10.5570	TevSTIB805.10.5910
Tb927.10.560	TevSTIB805.10.620
Tb927.10.5620	TevSTIB805.10.5960
Tb927.10.5630	TevSTIB805.10.5970
Tb927.10.5640	TevSTIB805.10.5980
Tb927.10.5650	TevSTIB805.10.5990
Tb927.10.5660	TevSTIB805.10.6000
Tb927.10.5670	TevSTIB805.10.6010
Tb927.10.5680	TevSTIB805.10.6020
Tb927.10.5690	TevSTIB805.10.6030
Tb927.10.5710	TevSTIB805.10.6050
Tb927.10.5720	TevSTIB805.10.6060
Tb927.10.5740	TevSTIB805.10.6080
Tb927.10.5750	TevSTIB805.10.6090
Tb927.10.5760	TevSTIB805.10.6110
Tb927.10.5770	TevSTIB805.10.6120
Tb927.10.5790	TevSTIB805.10.6140
Tb927.10.580	TevSTIB805.10.640
Tb927.10.5800	TevSTIB805.10.6150
Tb927.10.5810	TevSTIB805.10.6160
Tb927.10.5840	TevSTIB805.10.6190
Tb927.10.5850	TevSTIB805.10.6200
Tb927.10.5860	TevSTIB805.10.6210
Tb927.10.5870	TevSTIB805.10.6220
Tb927.10.5880	TevSTIB805.10.6230
Tb927.10.5890	TevSTIB805.10.6240
Tb927.10.590	TevSTIB805.10.650
Tb927.10.5900	TevSTIB805.10.6250
Tb927.10.5910	TevSTIB805.10.6260
Tb927.10.5920	TevSTIB805.10.6270
Tb927.10.5930	TevSTIB805.10.6280
Tb927.10.5940	TevSTIB805.10.6290
Tb927.10.5950	TevSTIB805.10.6300
Tb927.10.5960	TevSTIB805.10.6310
Tb927.10.5970	TevSTIB805.10.6320
Tb927.10.5980	TevSTIB805.10.6330
Tb927.10.5990	TevSTIB805.10.6340
Tb927.10.6000	TevSTIB805.10.6350
Tb927.10.6010	TevSTIB805.10.6360
Tb927.10.6020	TevSTIB805.10.6370
Tb927.10.6040	TevSTIB805.10.6390
Tb927.10.6050	TevSTIB805.10.6400
Tb927.10.6080	TevSTIB805.10.6430
Tb927.10.610	TevSTIB805.10.670
Tb927.10.6100	TevSTIB805.10.6450
Tb927.10.6110	TevSTIB805.10.6460
Tb927.10.6120	TevSTIB805.10.6470
Tb927.10.6130	TevSTIB805.10.6480
Tb927.10.6140	TevSTIB805.10.6490
Tb927.10.6160	TevSTIB805.10.6510
Tb927.10.6180	TevSTIB805.10.6530
Tb927.10.620	TevSTIB805.10.680
Tb927.10.6210	TevSTIB805.10.6560
Tb927.10.6220	TevSTIB805.10.6570
Tb927.10.6230	TevSTIB805.10.6580
Tb927.10.6240	TevSTIB805.10.6590
Tb927.10.6250	TevSTIB805.10.6600
Tb927.10.6260	TevSTIB805.10.6610
Tb927.10.6280	TevSTIB805.10.6630
Tb927.10.6290	TevSTIB805.10.6640
Tb927.10.6310	TevSTIB805.10.6660
Tb927.10.6320	TevSTIB805.10.6670
Tb927.10.6330	TevSTIB805.10.6690
Tb927.10.6340	TevSTIB805.10.6700
Tb927.10.6350	TevSTIB805.10.6710
Tb927.10.6360	TevSTIB805.10.6720
Tb927.10.6370	TevSTIB805.10.6730
Tb927.10.6390	TevSTIB805.10.6750
Tb927.10.640	TevSTIB805.10.700
Tb927.10.6410	TevSTIB805.10.6770
Tb927.10.6430	TevSTIB805.10.6800
Tb927.10.6440	TevSTIB805.10.6810
Tb927.10.6450	TevSTIB805.10.6820
Tb927.10.6460	TevSTIB805.10.6830
Tb927.10.6470	TevSTIB805.10.6840
Tb927.10.6480	TevSTIB805.10.6850
Tb927.10.6490	TevSTIB805.10.6860
Tb927.10.650	TevSTIB805.10.710
Tb927.10.6500	TevSTIB805.10.6870
Tb927.10.6520	TevSTIB805.10.6890
Tb927.10.6530	TevSTIB805.10.6900
Tb927.10.6550	TevSTIB805.10.6920
Tb927.10.6560	TevSTIB805.10.6930
Tb927.10.6570	TevSTIB805.10.6940
Tb927.10.6580	TevSTIB805.10.6950
Tb927.10.6590	TevSTIB805.10.6960
Tb927.10.6600	TevSTIB805.10.6970
Tb927.10.6610	TevSTIB805.10.6980
Tb927.10.6620	TevSTIB805.10.6990
Tb927.10.6630	TevSTIB805.10.7000
Tb927.10.6640	TevSTIB805.10.7010
Tb927.10.6650	TevSTIB805.10.7020
Tb927.10.6660	TevSTIB805.10.7030
Tb927.10.6670	TevSTIB805.10.7050
Tb927.10.6680	TevSTIB805.10.7060
Tb927.10.6690	TevSTIB805.10.7070
Tb927.10.670	TevSTIB805.10.730
Tb927.10.6700	TevSTIB805.10.7080
Tb927.10.6710	TevSTIB805.10.7090
Tb927.10.6720	TevSTIB805.10.7100
Tb927.10.6740	TevSTIB805.10.7120
Tb927.10.6750	TevSTIB805.10.7130
Tb927.10.6770	TevSTIB805.10.7150
Tb927.10.6790	TevSTIB805.10.7170
Tb927.10.680	TevSTIB805.10.740
Tb927.10.6800	TevSTIB805.10.7180
Tb927.10.6810	TevSTIB805.10.7190
Tb927.10.6820	TevSTIB805.10.7200
Tb927.10.6830	TevSTIB805.10.7210
Tb927.10.6840	TevSTIB805.10.7220
Tb927.10.6860	TevSTIB805.10.7240
Tb927.10.6870	TevSTIB805.10.7250
Tb927.10.6880	TevSTIB805.10.7270
Tb927.10.690	TevSTIB805.10.750
Tb927.10.6900	TevSTIB805.10.7290
Tb927.10.6930	TevSTIB805.10.7340
Tb927.10.6940	TevSTIB805.10.7410
Tb927.10.6960	TevSTIB805.10.7400
Tb927.10.6980	TevSTIB805.10.7420
Tb927.10.6990	TevSTIB805.10.7430
Tb927.10.70	TevSTIB805.10.70
Tb927.10.700	TevSTIB805.10.760
Tb927.10.7000	TevSTIB805.10.7440
Tb927.10.7010	TevSTIB805.10.7450
Tb927.10.7020	TevSTIB805.10.7460
Tb927.10.7030	TevSTIB805.10.7470
Tb927.10.7040	TevSTIB805.10.7480
Tb927.10.7050	TevSTIB805.10.7490
Tb927.10.7060	TevSTIB805.10.7500
Tb927.10.7070	TevSTIB805.10.7510
Tb927.10.7080	TevSTIB805.10.7520
Tb927.10.710	TevSTIB805.10.770
Tb927.10.7100	TevSTIB805.10.7540
Tb927.10.7110	TevSTIB805.10.7550
Tb927.10.7120	TevSTIB805.10.7560
Tb927.10.7130	TevSTIB805.10.7570
Tb927.10.7140	TevSTIB805.10.7580
Tb927.10.7150	TevSTIB805.10.7590
Tb927.10.7170	TevSTIB805.10.7630
Tb927.10.7190	TevSTIB805.10.7650
Tb927.10.7200	TevSTIB805.10.7660
Tb927.10.7210	TevSTIB805.10.7670
Tb927.10.7220	TevSTIB805.10.7680
Tb927.10.7230	TevSTIB805.10.7690
Tb927.10.7240	TevSTIB805.10.7700
Tb927.10.7250	TevSTIB805.10.7710
Tb927.10.7260	TevSTIB805.10.7720
Tb927.10.7270	TevSTIB805.10.7730
Tb927.10.7280	TevSTIB805.10.7740
Tb927.10.7290	TevSTIB805.10.7750
Tb927.10.730	TevSTIB805.10.790
Tb927.10.7300	TevSTIB805.10.7760
Tb927.10.7320	TevSTIB805.10.7790
Tb927.10.7330	TevSTIB805.10.7810
Tb927.10.7350	TevSTIB805.10.7820
Tb927.10.7360	TevSTIB805.10.7830
Tb927.10.7370	TevSTIB805.10.7840
Tb927.10.7390	TevSTIB805.10.7860
Tb927.10.740	TevSTIB805.10.800
Tb927.10.7400	TevSTIB805.10.7870
Tb927.10.7420	TevSTIB805.10.7890
Tb927.10.7430	TevSTIB805.10.7900
Tb927.10.7440	TevSTIB805.10.7910
Tb927.10.7450	TevSTIB805.10.7920
Tb927.10.7470	TevSTIB805.10.7940
Tb927.10.7480	TevSTIB805.10.7950
Tb927.10.7490	TevSTIB805.10.7960
Tb927.10.750	TevSTIB805.10.810
Tb927.10.7500	TevSTIB805.10.7970
Tb927.10.7510	TevSTIB805.10.7980
Tb927.10.7520	TevSTIB805.10.7990
Tb927.10.7530	TevSTIB805.10.8000
Tb927.10.7540	TevSTIB805.10.8010
Tb927.10.7550	TevSTIB805.10.8020
Tb927.10.7560	TevSTIB805.10.8030
Tb927.10.7580	TevSTIB805.10.8050
Tb927.10.7630	TevSTIB805.10.8100
Tb927.10.7640	TevSTIB805.10.8110
Tb927.10.7660	TevSTIB805.10.8130
Tb927.10.7670	TevSTIB805.10.8150
Tb927.10.7680	TevSTIB805.10.8160
Tb927.10.7690	TevSTIB805.10.8170
Tb927.10.7700	TevSTIB805.10.8180
Tb927.10.7710	TevSTIB805.10.8190
Tb927.10.7720	TevSTIB805.10.8200
Tb927.10.7730	TevSTIB805.10.8210
Tb927.10.7740	TevSTIB805.10.8220
Tb927.10.7750	TevSTIB805.10.8230
Tb927.10.7760	TevSTIB805.10.8240
Tb927.10.7770	TevSTIB805.10.8250
Tb927.10.7780	TevSTIB805.10.8260
Tb927.10.7790	TevSTIB805.10.8270
Tb927.10.780	TevSTIB805.10.850
Tb927.10.7800	TevSTIB805.10.8280
Tb927.10.7810	TevSTIB805.10.8290
Tb927.10.7820	TevSTIB805.10.8300
Tb927.10.7830	TevSTIB805.10.8310
Tb927.10.7840	TevSTIB805.10.8320
Tb927.10.7850	TevSTIB805.10.8330
Tb927.10.7860	TevSTIB805.10.8340
Tb927.10.7880	TevSTIB805.10.8360
Tb927.10.7890	TevSTIB805.10.8370
Tb927.10.790	TevSTIB805.10.860
Tb927.10.7900	TevSTIB805.10.8380
Tb927.10.7920	TevSTIB805.10.8400
Tb927.10.7930	TevSTIB805.10.8410
Tb927.10.7950	TevSTIB805.10.8430
Tb927.10.7960	TevSTIB805.10.8440
Tb927.10.7970	TevSTIB805.10.8450
Tb927.10.7980	TevSTIB805.10.8460
Tb927.10.7990	TevSTIB805.10.8480
Tb927.10.800	TevSTIB805.10.870
Tb927.10.8000	TevSTIB805.10.8490
Tb927.10.8040	TevSTIB805.10.8530
Tb927.10.8050	TevSTIB805.10.8540
Tb927.10.8060	TevSTIB805.10.8550
Tb927.10.8070	TevSTIB805.10.8560
Tb927.10.8080	TevSTIB805.10.8570
Tb927.10.8090	TevSTIB805.10.8580
Tb927.10.810	TevSTIB805.10.880
Tb927.10.8100	TevSTIB805.10.8590
Tb927.10.8120	TevSTIB805.10.8610
Tb927.10.8130	TevSTIB805.10.8620
Tb927.10.8140	TevSTIB805.10.8630
Tb927.10.8150	TevSTIB805.10.8640
Tb927.10.8160	TevSTIB805.10.8650
Tb927.10.8170	TevSTIB805.10.8660
Tb927.10.8180	TevSTIB805.10.8670
Tb927.10.8190	TevSTIB805.10.8680
Tb927.10.820	TevSTIB805.10.890
Tb927.10.8200	TevSTIB805.10.8690
Tb927.10.8220	TevSTIB805.10.8710
Tb927.10.8230	TevSTIB805.10.8720
Tb927.10.8240	TevSTIB805.10.8730
Tb927.10.8250	TevSTIB805.10.8740
Tb927.10.8260	TevSTIB805.10.8750
Tb927.10.8290	TevSTIB805.10.8780
Tb927.10.830	TevSTIB805.10.910
Tb927.10.8300	TevSTIB805.10.8790
Tb927.10.8310	TevSTIB805.10.8800
Tb927.10.8330	TevSTIB805.10.8820
Tb927.10.8340	TevSTIB805.10.8840
Tb927.10.8350	TevSTIB805.10.8860
Tb927.10.8360	TevSTIB805.10.8870
Tb927.10.8370	TevSTIB805.10.8880
Tb927.10.8380	TevSTIB805.10.8890
Tb927.10.8390	TevSTIB805.10.8900
Tb927.10.840	TevSTIB805.10.930
Tb927.10.8400	TevSTIB805.10.8910
Tb927.10.8420	TevSTIB805.10.8930
Tb927.10.8430	TevSTIB805.10.8940
Tb927.10.8460	TevSTIB805.10.8970
Tb927.10.8470	TevSTIB805.10.8980
Tb927.10.850	TevSTIB805.10.940
Tb927.10.8540	TevSTIB805.10.9060
Tb927.10.8550	TevSTIB805.10.9070
Tb927.10.8570	TevSTIB805.10.9100
Tb927.10.8580	TevSTIB805.10.9110
Tb927.10.8590	TevSTIB805.10.9120
Tb927.10.860	TevSTIB805.10.950
Tb927.10.8600	TevSTIB805.10.9140
Tb927.10.8620	TevSTIB805.10.9160
Tb927.10.8640	TevSTIB805.10.9180
Tb927.10.8650	TevSTIB805.10.9190
Tb927.10.8660	TevSTIB805.10.9200
Tb927.10.8670	TevSTIB805.10.9210
Tb927.10.8680	TevSTIB805.10.9220
Tb927.10.8690	TevSTIB805.10.9230
Tb927.10.870	TevSTIB805.10.960
Tb927.10.8700	TevSTIB805.10.9240
Tb927.10.8710	TevSTIB805.10.9250
Tb927.10.8720	TevSTIB805.10.9260
Tb927.10.8740	TevSTIB805.10.9280
Tb927.10.8750	TevSTIB805.10.9290
Tb927.10.8770	TevSTIB805.10.9320
Tb927.10.8780	TevSTIB805.10.9330
Tb927.10.8790	TevSTIB805.10.9340
Tb927.10.880	TevSTIB805.10.970
Tb927.10.8800	TevSTIB805.10.9350
Tb927.10.8820	TevSTIB805.10.9380
Tb927.10.8840	TevSTIB805.10.9400
Tb927.10.8850	TevSTIB805.10.9410
Tb927.10.8860	TevSTIB805.10.9420
Tb927.10.8870	TevSTIB805.10.9430
Tb927.10.8900	TevSTIB805.10.9460
Tb927.10.8910	TevSTIB805.10.9470
Tb927.10.8920	TevSTIB805.10.9480
Tb927.10.8940	TevSTIB805.10.9500
Tb927.10.8960	TevSTIB805.10.9520
Tb927.10.8990	TevSTIB805.10.9550
Tb927.10.9000	TevSTIB805.10.9560
Tb927.10.9010	TevSTIB805.10.9570
Tb927.10.9020	TevSTIB805.10.9580
Tb927.10.9030	TevSTIB805.10.9590
Tb927.10.9040	TevSTIB805.10.9600
Tb927.10.9050	TevSTIB805.10.9610
Tb927.10.9060	TevSTIB805.10.9620
Tb927.10.9080	TevSTIB805.10.9640
Tb927.10.9090	TevSTIB805.10.9650
Tb927.10.910	TevSTIB805.10.1000
Tb927.10.9100	TevSTIB805.10.9660
Tb927.10.9110	TevSTIB805.10.9670
Tb927.10.9130	TevSTIB805.10.9690
Tb927.10.9150	TevSTIB805.10.9710
Tb927.10.9160	TevSTIB805.10.9720
Tb927.10.9170	TevSTIB805.10.9730
Tb927.10.9180	TevSTIB805.10.9740
Tb927.10.9190	TevSTIB805.10.9760
Tb927.10.920	TevSTIB805.10.1010
Tb927.10.9200	TevSTIB805.10.9770
Tb927.10.9210	TevSTIB805.10.9780
Tb927.10.9220	TevSTIB805.10.9790
Tb927.10.9230	TevSTIB805.10.9810
Tb927.10.9240	TevSTIB805.10.9820
Tb927.10.9250	TevSTIB805.10.9830
Tb927.10.9260	TevSTIB805.10.9840
Tb927.10.9270	TevSTIB805.10.9850
Tb927.10.9290	TevSTIB805.10.9870
Tb927.10.930	TevSTIB805.10.1020
Tb927.10.9300	TevSTIB805.10.9880
Tb927.10.9310	TevSTIB805.10.9890
Tb927.10.9320	TevSTIB805.10.9900
Tb927.10.9330	TevSTIB805.10.9910
Tb927.10.9370	TevSTIB805.10.9950
Tb927.10.9380	TevSTIB805.10.9960
Tb927.10.940	TevSTIB805.10.1030
Tb927.10.9400	TevSTIB805.10.9980
Tb927.10.9430	TevSTIB805.10.10010
Tb927.10.9450	TevSTIB805.10.10030
Tb927.10.9490	TevSTIB805.10.10050
Tb927.10.950	TevSTIB805.10.1040
Tb927.10.9500	TevSTIB805.10.10060
Tb927.10.9510	TevSTIB805.10.10070
Tb927.10.9520	TevSTIB805.10.10080
Tb927.10.9530	TevSTIB805.10.10100
Tb927.10.9540	TevSTIB805.10.10110
Tb927.10.9550	TevSTIB805.10.10120
Tb927.10.9560	TevSTIB805.10.10130
Tb927.10.9570	TevSTIB805.10.10140
Tb927.10.9580	TevSTIB805.10.10160
Tb927.10.9590	TevSTIB805.10.10170
Tb927.10.960	TevSTIB805.10.1050
Tb927.10.9600	TevSTIB805.10.10180
Tb927.10.9640	TevSTIB805.10.10220
Tb927.10.9650	TevSTIB805.10.10230
Tb927.10.9660	TevSTIB805.10.10240
Tb927.10.9670	TevSTIB805.10.10250
Tb927.10.9680	TevSTIB805.10.10260
Tb927.10.970	TevSTIB805.10.1060
Tb927.10.9720	TevSTIB805.10.10300
Tb927.10.9730	TevSTIB805.10.10310
Tb927.10.9740	TevSTIB805.10.10320
Tb927.10.9770	TevSTIB805.10.10350
Tb927.10.9780	TevSTIB805.10.10360
Tb927.10.9790	TevSTIB805.10.10370
Tb927.10.980	TevSTIB805.10.1070
Tb927.10.9800	TevSTIB805.10.10380
Tb927.10.9840	TevSTIB805.10.10420
Tb927.10.9850	TevSTIB805.10.10430
Tb927.10.9870	TevSTIB805.10.10450
Tb927.10.9890	TevSTIB805.10.10470
Tb927.10.990	TevSTIB805.10.1080
Tb927.10.9900	TevSTIB805.10.10480
Tb927.10.9910	TevSTIB805.10.10490
Tb927.10.9920	TevSTIB805.10.10510
Tb927.10.9930	TevSTIB805.10.10520
Tb927.10.9940	TevSTIB805.10.10530
Tb927.10.9950	TevSTIB805.10.10540
Tb927.10.9960	TevSTIB805.10.10550
Tb927.10.9980	TevSTIB805.10.10570
Tb927.10.9990	TevSTIB805.10.10580
Tb927.11.1000	TevSTIB805.11_01.1010
Tb927.11.10000	TevSTIB805.11_01.10310
Tb927.11.10010	TevSTIB805.11_01.10320
Tb927.11.10020	TevSTIB805.11_01.10330
Tb927.11.10030	TevSTIB805.11_01.10340
Tb927.11.10040	TevSTIB805.11_01.10350
Tb927.11.10060	TevSTIB805.11_01.10370
Tb927.11.10070	TevSTIB805.11_01.10380
Tb927.11.10090	TevSTIB805.11_01.10400
Tb927.11.10100	TevSTIB805.11_01.10410
Tb927.11.10110	TevSTIB805.11_01.10420
Tb927.11.10120	TevSTIB805.11_01.10430
Tb927.11.10130	TevSTIB805.11_01.10440
Tb927.11.10160	TevSTIB805.11_01.10470
Tb927.11.10180	TevSTIB805.11_01.10490
Tb927.11.10190	TevSTIB805.11_01.10500
Tb927.11.1020	TevSTIB805.11_01.1030
Tb927.11.10200	TevSTIB805.11_01.10510
Tb927.11.10210	TevSTIB805.11_01.10520
Tb927.11.10220	TevSTIB805.11_01.10530
Tb927.11.10250	TevSTIB805.11_01.10560
Tb927.11.10260	TevSTIB805.11_01.10570
Tb927.11.10270	TevSTIB805.11_01.10580
Tb927.11.10290	TevSTIB805.11_01.10600
Tb927.11.1030	TevSTIB805.11_01.1040
Tb927.11.10300	TevSTIB805.11_01.10610
Tb927.11.10310	TevSTIB805.11_01.10620
Tb927.11.10320	TevSTIB805.11_01.10630
Tb927.11.10330	TevSTIB805.11_01.10640
Tb927.11.10340	TevSTIB805.11_01.10650
Tb927.11.10350	TevSTIB805.11_01.10660
Tb927.11.10360	TevSTIB805.11_01.10670
Tb927.11.10370	TevSTIB805.11_01.10680
Tb927.11.10380	TevSTIB805.11_01.10690
Tb927.11.1040	TevSTIB805.11_01.1050
Tb927.11.10410	TevSTIB805.11_01.10720
Tb927.11.10420	TevSTIB805.11_01.10730
Tb927.11.10430	TevSTIB805.11_01.10740
Tb927.11.10440	TevSTIB805.11_01.10750
Tb927.11.10450	TevSTIB805.11_01.10760
Tb927.11.10460	TevSTIB805.11_01.10780
Tb927.11.10470	TevSTIB805.11_01.10790
Tb927.11.10480	TevSTIB805.11_01.10800
Tb927.11.10490	TevSTIB805.11_01.10810
Tb927.11.1050	TevSTIB805.11_01.1060
Tb927.11.10500	TevSTIB805.11_01.10820
Tb927.11.10510	TevSTIB805.11_01.10830
Tb927.11.10520	TevSTIB805.11_01.10840
Tb927.11.10530	TevSTIB805.11_01.10850
Tb927.11.10540	TevSTIB805.11_01.10860
Tb927.11.10550	TevSTIB805.11_01.10870
Tb927.11.10560	TevSTIB805.11_01.10880
Tb927.11.10580	TevSTIB805.11_01.10900
Tb927.11.1060	TevSTIB805.11_01.1070
Tb927.11.10610	TevSTIB805.11_01.10930
Tb927.11.10620	TevSTIB805.11_01.10940
Tb927.11.10640	TevSTIB805.11_01.10960
Tb927.11.10650	TevSTIB805.11_01.10970
Tb927.11.10660	TevSTIB805.11_01.10980
Tb927.11.10670	TevSTIB805.11_01.10990
Tb927.11.10680	TevSTIB805.11_01.11000
Tb927.11.1070	TevSTIB805.11_01.1080
Tb927.11.10700	TevSTIB805.11_01.11020
Tb927.11.10730	TevSTIB805.11_01.11050
Tb927.11.10740	TevSTIB805.11_01.11060
Tb927.11.10750	TevSTIB805.11_01.11070
Tb927.11.10760	TevSTIB805.11_01.11080
Tb927.11.10770	TevSTIB805.11_01.11090
Tb927.11.1080	TevSTIB805.11_01.1090
Tb927.11.10800	TevSTIB805.11_01.11130
Tb927.11.10810	TevSTIB805.11_01.11140
Tb927.11.10820	TevSTIB805.11_01.11150
Tb927.11.10830	TevSTIB805.11_01.11160
Tb927.11.10840	TevSTIB805.11_01.11170
Tb927.11.10860	TevSTIB805.11_01.11190
Tb927.11.10890	TevSTIB805.11_01.11220
Tb927.11.10900	TevSTIB805.11_01.11230
Tb927.11.10920	TevSTIB805.11_01.11250
Tb927.11.10930	TevSTIB805.11_01.11260
Tb927.11.10940	TevSTIB805.11_01.11270
Tb927.11.10970	TevSTIB805.11_01.11310
Tb927.11.10980	TevSTIB805.11_01.11320
Tb927.11.10990	TevSTIB805.11_01.11330
Tb927.11.110	TevSTIB805.11_01.30
Tb927.11.11000	TevSTIB805.11_01.11340
Tb927.11.11010	TevSTIB805.11_01.11350
Tb927.11.11020	TevSTIB805.11_01.11360
Tb927.11.11030	TevSTIB805.11_01.11370
Tb927.11.11040	TevSTIB805.11_01.11380
Tb927.11.11070	TevSTIB805.11_01.11410
Tb927.11.11090	TevSTIB805.11_01.11430
Tb927.11.1110	TevSTIB805.11_01.1110
Tb927.11.11110	TevSTIB805.11_01.11450
Tb927.11.11130	TevSTIB805.11_01.11470
Tb927.11.11140	TevSTIB805.11_01.11490
Tb927.11.11150	TevSTIB805.11_01.11500
Tb927.11.11160	TevSTIB805.11_01.11510
Tb927.11.11170	TevSTIB805.11_01.11520
Tb927.11.11180	TevSTIB805.11_01.11530
Tb927.11.11200	TevSTIB805.11_01.11540
Tb927.11.11210	TevSTIB805.11_01.11550
Tb927.11.11230	TevSTIB805.11_01.11580
Tb927.11.11240	TevSTIB805.11_01.11590
Tb927.11.11250	TevSTIB805.11_01.11600
Tb927.11.11270	TevSTIB805.11_01.11630
Tb927.11.11280	TevSTIB805.11_01.11640
Tb927.11.11290	TevSTIB805.11_01.11650
Tb927.11.1130	TevSTIB805.11_01.1130
Tb927.11.11300	TevSTIB805.11_01.11660
Tb927.11.11320	TevSTIB805.11_01.11680
Tb927.11.11340	TevSTIB805.11_01.11700
Tb927.11.11350	TevSTIB805.11_01.11710
Tb927.11.11390	TevSTIB805.11_01.11750
Tb927.11.11410	TevSTIB805.11_01.11790
Tb927.11.11430	TevSTIB805.11_01.11810
Tb927.11.11440	TevSTIB805.11_01.11820
Tb927.11.11450	TevSTIB805.11_01.11830
Tb927.11.11480	TevSTIB805.11_01.11860
Tb927.11.11490	TevSTIB805.11_01.11870
Tb927.11.1150	TevSTIB805.11_01.1140
Tb927.11.11500	TevSTIB805.11_01.11890
Tb927.11.11510	TevSTIB805.11_01.11900
Tb927.11.11520	TevSTIB805.11_01.11910
Tb927.11.11570	TevSTIB805.11_01.11940
Tb927.11.11580	TevSTIB805.11_01.11950
Tb927.11.11590	TevSTIB805.11_01.11960
Tb927.11.1160	TevSTIB805.11_01.1150
Tb927.11.11600	TevSTIB805.11_01.11970
Tb927.11.11610	TevSTIB805.11_01.11980
Tb927.11.11640	TevSTIB805.11_01.12010
Tb927.11.11650	TevSTIB805.11_01.12020
Tb927.11.11660	TevSTIB805.11_01.12030
Tb927.11.11670	TevSTIB805.11_01.12040
Tb927.11.11690	TevSTIB805.11_01.12060
Tb927.11.1170	TevSTIB805.11_01.1160
Tb927.11.11700	TevSTIB805.11_01.12080
Tb927.11.11710	TevSTIB805.11_01.12090
Tb927.11.11720	TevSTIB805.11_01.12100
Tb927.11.11730	TevSTIB805.11_01.12110
Tb927.11.11760	TevSTIB805.11_01.12130
Tb927.11.11770	TevSTIB805.11_01.12140
Tb927.11.11780	TevSTIB805.11_01.12160
Tb927.11.11790	TevSTIB805.11_01.12170
Tb927.11.1180	TevSTIB805.11_01.1170
Tb927.11.11830	TevSTIB805.11_01.12210
Tb927.11.11840	TevSTIB805.11_01.12220
Tb927.11.11850	TevSTIB805.11_01.12230
Tb927.11.11860	TevSTIB805.11_01.12240
Tb927.11.11880	TevSTIB805.11_01.12260
Tb927.11.1190	TevSTIB805.11_01.1180
Tb927.11.11900	TevSTIB805.11_01.12270
Tb927.11.11910	TevSTIB805.11_01.12280
Tb927.11.11920	TevSTIB805.11_01.12290
Tb927.11.11930.2	TevSTIB805.11_01.12300
Tb927.11.11940	TevSTIB805.11_01.12310
Tb927.11.11960	TevSTIB805.11_01.12330
Tb927.11.11970	TevSTIB805.11_01.12340
Tb927.11.11980	TevSTIB805.11_01.12360
Tb927.11.11990	TevSTIB805.11_01.12370
Tb927.11.1200	TevSTIB805.11_01.1190
Tb927.11.12000	TevSTIB805.11_01.12380
Tb927.11.12010	TevSTIB805.11_01.12390
Tb927.11.12020	TevSTIB805.11_01.12400
Tb927.11.12030	TevSTIB805.11_01.12410
Tb927.11.12050	TevSTIB805.11_01.12430
Tb927.11.12060	TevSTIB805.11_01.12440
Tb927.11.12070	TevSTIB805.11_01.12450
Tb927.11.12080	TevSTIB805.11_01.12460
Tb927.11.12090	TevSTIB805.11_01.12470
Tb927.11.1210	TevSTIB805.11_01.1200
Tb927.11.12110	TevSTIB805.11_01.12490
Tb927.11.12120	TevSTIB805.11_01.12500
Tb927.11.12150	TevSTIB805.11_01.12540
Tb927.11.12170	TevSTIB805.11_01.12560
Tb927.11.12180	TevSTIB805.11_01.12570
Tb927.11.12190	TevSTIB805.11_01.12580
Tb927.11.1220	TevSTIB805.11_01.1210
Tb927.11.12200	TevSTIB805.11_01.12590
Tb927.11.12210	TevSTIB805.11_01.12600
Tb927.11.12220	TevSTIB805.11_01.12610
Tb927.11.12230	TevSTIB805.11_01.12620
Tb927.11.12240	TevSTIB805.11_01.12630
Tb927.11.12250	TevSTIB805.11_01.12640
Tb927.11.12260	TevSTIB805.11_01.12650
Tb927.11.12270	TevSTIB805.11_01.12660
Tb927.11.12280	TevSTIB805.11_01.12670
Tb927.11.12290	TevSTIB805.11_01.12680
Tb927.11.1230	TevSTIB805.11_01.1220
Tb927.11.12300	TevSTIB805.11_01.12690
Tb927.11.12320	TevSTIB805.11_01.12710
Tb927.11.12330	TevSTIB805.11_01.12720
Tb927.11.12350	TevSTIB805.11_01.12740
Tb927.11.12360	TevSTIB805.11_01.12750
Tb927.11.12370	TevSTIB805.11_01.12760
Tb927.11.12380	TevSTIB805.11_01.12770
Tb927.11.12390	TevSTIB805.11_01.12780
Tb927.11.12400	TevSTIB805.11_01.12790
Tb927.11.12420	TevSTIB805.11_01.12810
Tb927.11.12430	TevSTIB805.11_01.12820
Tb927.11.12440	TevSTIB805.11_01.12830
Tb927.11.12450.2	TevSTIB805.11_01.12840
Tb927.11.12460	TevSTIB805.11_01.12850
Tb927.11.12480	TevSTIB805.11_01.12870
Tb927.11.12490	TevSTIB805.11_01.12880
Tb927.11.12500	TevSTIB805.11_01.12890
Tb927.11.12510	TevSTIB805.11_01.12900
Tb927.11.12520	TevSTIB805.11_01.12910
Tb927.11.12530	TevSTIB805.11_01.12920
Tb927.11.12540	TevSTIB805.11_01.12930
Tb927.11.12570	TevSTIB805.11_01.12950
Tb927.11.12580	TevSTIB805.11_01.12960
Tb927.11.12590	TevSTIB805.11_01.12970
Tb927.11.1260	TevSTIB805.11_01.1250
Tb927.11.12600	TevSTIB805.11_01.12980
Tb927.11.12610	TevSTIB805.11_01.12990
Tb927.11.12620	TevSTIB805.11_01.13000
Tb927.11.12630	TevSTIB805.11_01.13010
Tb927.11.12640	TevSTIB805.11_01.13020
Tb927.11.12650	TevSTIB805.11_01.13030
Tb927.11.12660	TevSTIB805.11_01.13040
Tb927.11.12670	TevSTIB805.11_01.13050
Tb927.11.12680	TevSTIB805.11_01.13060
Tb927.11.12700	TevSTIB805.11_01.13080
Tb927.11.12720	TevSTIB805.11_01.13130
Tb927.11.12730	TevSTIB805.11_01.13140
Tb927.11.12740.1	TevSTIB805.11_01.13150
Tb927.11.12750	TevSTIB805.11_01.13160
Tb927.11.12760	TevSTIB805.11_01.13170
Tb927.11.12780	TevSTIB805.11_01.13220
Tb927.11.1280	TevSTIB805.11_01.1270
Tb927.11.12820	TevSTIB805.11_01.13230
Tb927.11.12830	TevSTIB805.11_01.13240
Tb927.11.12850	TevSTIB805.11_01.13260
Tb927.11.12860.1	TevSTIB805.11_01.13270
Tb927.11.12870	TevSTIB805.11_01.13280
Tb927.11.12910	TevSTIB805.11_01.13320
Tb927.11.12920	TevSTIB805.11_01.13330
Tb927.11.12930	TevSTIB805.11_01.13340
Tb927.11.12940	TevSTIB805.11_01.13350
Tb927.11.12950	TevSTIB805.11_01.13360
Tb927.11.12960	TevSTIB805.11_01.13370
Tb927.11.12970	TevSTIB805.11_01.13380
Tb927.11.12980	TevSTIB805.11_01.13390
Tb927.11.12990	TevSTIB805.11_01.13400
Tb927.11.1300	TevSTIB805.11_01.1290
Tb927.11.13010	TevSTIB805.11_01.13430
Tb927.11.13030	TevSTIB805.11_01.13470
Tb927.11.13060	TevSTIB805.11_01.13480
Tb927.11.13070	TevSTIB805.11_01.13490
Tb927.11.13080	TevSTIB805.11_01.13500
Tb927.11.1310	TevSTIB805.11_01.1300
Tb927.11.13100	TevSTIB805.11_01.13520
Tb927.11.13110	TevSTIB805.11_01.13530
Tb927.11.13120	TevSTIB805.11_01.13550
Tb927.11.13150	TevSTIB805.11_01.13590
Tb927.11.13160	TevSTIB805.11_01.13600
Tb927.11.13170	TevSTIB805.11_01.13620
Tb927.11.13190	TevSTIB805.11_01.13640
Tb927.11.13200	TevSTIB805.11_01.13650
Tb927.11.13210	TevSTIB805.11_01.13660
Tb927.11.13220	TevSTIB805.11_01.13670
Tb927.11.13240	TevSTIB805.11_01.13690
Tb927.11.13250	TevSTIB805.11_01.13700
Tb927.11.13260.2	TevSTIB805.11_01.13710
Tb927.11.13270	TevSTIB805.11_01.13720
Tb927.11.1330	TevSTIB805.11_01.1320
Tb927.11.13300	TevSTIB805.11_01.13750
Tb927.11.13310	TevSTIB805.11_01.13760
Tb927.11.13320	TevSTIB805.11_01.13770
Tb927.11.13330	TevSTIB805.11_01.13780
Tb927.11.13340	TevSTIB805.11_01.13790
Tb927.11.13370	TevSTIB805.11_01.13820
Tb927.11.13380	TevSTIB805.11_01.13830
Tb927.11.13390	TevSTIB805.11_01.13840
Tb927.11.1340	TevSTIB805.11_01.1330
Tb927.11.13400	TevSTIB805.11_01.13850
Tb927.11.13410	TevSTIB805.11_01.13860
Tb927.11.13430	TevSTIB805.11_01.13880
Tb927.11.13450	TevSTIB805.11_01.13900
Tb927.11.13460	TevSTIB805.11_01.13910
Tb927.11.13470	TevSTIB805.11_01.13920
Tb927.11.13480	TevSTIB805.11_01.13930
Tb927.11.13490	TevSTIB805.11_01.13940
Tb927.11.13500	TevSTIB805.11_01.13950
Tb927.11.13530	TevSTIB805.11_01.13980
Tb927.11.13540	TevSTIB805.11_01.13990
Tb927.11.13550	TevSTIB805.11_01.14000
Tb927.11.13570	TevSTIB805.11_01.14020
Tb927.11.13590	TevSTIB805.11_01.14040
Tb927.11.1360	TevSTIB805.11_01.1350
Tb927.11.13610	TevSTIB805.11_01.14060
Tb927.11.13630	TevSTIB805.11_01.14080
Tb927.11.13640	TevSTIB805.11_01.14090
Tb927.11.13650	TevSTIB805.11_01.14100
Tb927.11.13660	TevSTIB805.11_01.14110
Tb927.11.13670	TevSTIB805.11_01.14120
Tb927.11.13680	TevSTIB805.11_01.14130
Tb927.11.13690.2	TevSTIB805.11_01.14140
Tb927.11.13700	TevSTIB805.11_01.14150
Tb927.11.13720	TevSTIB805.11_01.14170
Tb927.11.13730	TevSTIB805.11_01.14180
Tb927.11.13740	TevSTIB805.11_01.14190
Tb927.11.13760	TevSTIB805.11_01.14220
Tb927.11.13770	TevSTIB805.11_01.14230
Tb927.11.13780	TevSTIB805.11_01.14240
Tb927.11.13790	TevSTIB805.11_01.14250
Tb927.11.1380	TevSTIB805.11_01.1370
Tb927.11.13800	TevSTIB805.11_01.14260
Tb927.11.13810	TevSTIB805.11_01.14270
Tb927.11.13820	TevSTIB805.11_01.14280
Tb927.11.13840	TevSTIB805.11_01.14300
Tb927.11.13850	TevSTIB805.11_01.14310
Tb927.11.13860	TevSTIB805.11_01.14320
Tb927.11.13870	TevSTIB805.11_01.14330
Tb927.11.13880	TevSTIB805.11_01.14340
Tb927.11.1390	TevSTIB805.11_01.1380
Tb927.11.13900	TevSTIB805.11_01.14370
Tb927.11.13930	TevSTIB805.11_01.14400
Tb927.11.13950	TevSTIB805.11_01.14420
Tb927.11.13960	TevSTIB805.11_01.14430
Tb927.11.13970	TevSTIB805.11_01.14440
Tb927.11.13980	TevSTIB805.11_01.14450
Tb927.11.13990	TevSTIB805.11_01.14460
Tb927.11.140	TevSTIB805.11_01.60
Tb927.11.14000	TevSTIB805.11_01.14490
Tb927.11.14010	TevSTIB805.11_01.14480
Tb927.11.14030	TevSTIB805.11_01.14500
Tb927.11.14040	TevSTIB805.11_01.14510
Tb927.11.14050	TevSTIB805.11_01.14520
Tb927.11.14060	TevSTIB805.11_01.14530
Tb927.11.14070	TevSTIB805.11_01.14540
Tb927.11.14090	TevSTIB805.11_01.14560
Tb927.11.1410	TevSTIB805.11_01.1400
Tb927.11.14100	TevSTIB805.11_01.14570
Tb927.11.14110	TevSTIB805.11_01.14590
Tb927.11.14120	TevSTIB805.11_01.14600
Tb927.11.14140	TevSTIB805.11_01.14620
Tb927.11.14150	TevSTIB805.11_01.14630
Tb927.11.14160	TevSTIB805.11_01.14640
Tb927.11.14170	TevSTIB805.11_01.14660
Tb927.11.14180	TevSTIB805.11_01.14670
Tb927.11.14190	TevSTIB805.11_01.14680
Tb927.11.1420	TevSTIB805.11_01.1410
Tb927.11.14200	TevSTIB805.11_01.14690
Tb927.11.14220	TevSTIB805.11_01.14710
Tb927.11.14230	TevSTIB805.11_01.14720
Tb927.11.14240	TevSTIB805.11_01.14730
Tb927.11.14250	TevSTIB805.11_01.14740
Tb927.11.14260	TevSTIB805.11_01.14750
Tb927.11.14270	TevSTIB805.11_01.14760
Tb927.11.14280	TevSTIB805.11_01.14770
Tb927.11.14290	TevSTIB805.11_01.14780
Tb927.11.1430	TevSTIB805.11_01.1420
Tb927.11.14300	TevSTIB805.11_01.14790
Tb927.11.14310	TevSTIB805.11_01.14800
Tb927.11.14330	TevSTIB805.11_01.14820
Tb927.11.14340	TevSTIB805.11_01.14830
Tb927.11.14350	TevSTIB805.11_01.14840
Tb927.11.14390	TevSTIB805.11_01.14880
Tb927.11.1440	TevSTIB805.11_01.1430
Tb927.11.14400	TevSTIB805.11_01.14890
Tb927.11.14410	TevSTIB805.11_01.14900
Tb927.11.14420	TevSTIB805.11_01.14910
Tb927.11.14430	TevSTIB805.11_01.14920
Tb927.11.14440	TevSTIB805.11_01.14930
Tb927.11.14450	TevSTIB805.11_01.14940
Tb927.11.14460	TevSTIB805.11_01.14950
Tb927.11.14470	TevSTIB805.11_01.14960
Tb927.11.14480	TevSTIB805.11_01.14970
Tb927.11.14490	TevSTIB805.11_01.14980
Tb927.11.14500	TevSTIB805.11_01.14990
Tb927.11.14520	TevSTIB805.11_01.15010
Tb927.11.14530	TevSTIB805.11_01.15020
Tb927.11.14540	TevSTIB805.11_01.15030
Tb927.11.14550	TevSTIB805.11_01.15040
Tb927.11.14560	TevSTIB805.11_01.15050
Tb927.11.14580	TevSTIB805.11_01.15070
Tb927.11.14590	TevSTIB805.11_01.15080
Tb927.11.14610	TevSTIB805.11_01.15100
Tb927.11.14620	TevSTIB805.11_01.15110
Tb927.11.14630	TevSTIB805.11_01.15150
Tb927.11.14640	TevSTIB805.11_01.15160
Tb927.11.14650	TevSTIB805.11_01.15170
Tb927.11.14680	TevSTIB805.11_01.15200
Tb927.11.14690	TevSTIB805.11_01.15210
Tb927.11.1470	TevSTIB805.11_01.1460
Tb927.11.14710	TevSTIB805.11_01.15230
Tb927.11.14740	TevSTIB805.11_01.15260
Tb927.11.14750	TevSTIB805.11_01.15270
Tb927.11.14760	TevSTIB805.11_01.15280
Tb927.11.14770	TevSTIB805.11_01.15290
Tb927.11.14780	TevSTIB805.11_01.15310
Tb927.11.1480	TevSTIB805.11_01.1470
Tb927.11.14800	TevSTIB805.11_01.15330
Tb927.11.14810	TevSTIB805.11_01.15340
Tb927.11.14820	TevSTIB805.11_01.15350
Tb927.11.14830	TevSTIB805.11_01.15360
Tb927.11.14840	TevSTIB805.11_01.15370
Tb927.11.14850	TevSTIB805.11_01.15380
Tb927.11.14860	TevSTIB805.11_01.15390
Tb927.11.14870	TevSTIB805.11_01.15400
Tb927.11.14880	TevSTIB805.11_01.15410
Tb927.11.14890	TevSTIB805.11_01.15420
Tb927.11.14900	TevSTIB805.11_01.15430
Tb927.11.14910	TevSTIB805.11_01.15440
Tb927.11.14920	TevSTIB805.11_01.15450
Tb927.11.14930	TevSTIB805.11_01.15460
Tb927.11.14940	TevSTIB805.11_01.15470
Tb927.11.14950	TevSTIB805.11_01.15480
Tb927.11.14970	TevSTIB805.11_01.15500
Tb927.11.15000	TevSTIB805.11_01.15530
Tb927.11.15010	TevSTIB805.11_01.15540
Tb927.11.15020	TevSTIB805.11_01.15550
Tb927.11.15050	TevSTIB805.11_01.15580
Tb927.11.15060.1	TevSTIB805.11_01.15590
Tb927.11.15080	TevSTIB805.11_01.15610
Tb927.11.15090	TevSTIB805.11_01.15620
Tb927.11.15100	TevSTIB805.11_01.15630
Tb927.11.15120	TevSTIB805.11_01.15650
Tb927.11.15130	TevSTIB805.11_01.15660
Tb927.11.15140	TevSTIB805.11_01.15670
Tb927.11.15150	TevSTIB805.11_01.15680
Tb927.11.15160	TevSTIB805.11_01.15690
Tb927.11.15170	TevSTIB805.11_01.15700
Tb927.11.15180	TevSTIB805.11_01.15710
Tb927.11.15190	TevSTIB805.11_01.15720
Tb927.11.15200	TevSTIB805.11_01.15730
Tb927.11.15210	TevSTIB805.11_01.15740
Tb927.11.15220	TevSTIB805.11_01.15750
Tb927.11.15230	TevSTIB805.11_01.15760
Tb927.11.15240	TevSTIB805.11_01.15770
Tb927.11.15250	TevSTIB805.11_01.15780
Tb927.11.15270	TevSTIB805.11_01.15800
Tb927.11.15280	TevSTIB805.11_01.15810
Tb927.11.15290	TevSTIB805.11_01.15820
Tb927.11.15300	TevSTIB805.11_01.15830
Tb927.11.15310	TevSTIB805.11_01.15840
Tb927.11.15320	TevSTIB805.11_01.15850
Tb927.11.15330	TevSTIB805.11_01.15860
Tb927.11.15340	TevSTIB805.11_01.15870
Tb927.11.15350	TevSTIB805.11_01.15880
Tb927.11.15360	TevSTIB805.11_01.15890
Tb927.11.15380	TevSTIB805.11_01.15910
Tb927.11.15390	TevSTIB805.11_01.15920
Tb927.11.15400	TevSTIB805.11_01.15930
Tb927.11.15410	TevSTIB805.11_01.15940
Tb927.11.15420	TevSTIB805.11_01.15950
Tb927.11.15430	TevSTIB805.11_01.15960
Tb927.11.15460	TevSTIB805.11_01.15990
Tb927.11.15480	TevSTIB805.11_01.16010
Tb927.11.15490	TevSTIB805.11_01.16020
Tb927.11.1550	TevSTIB805.11_01.1540
Tb927.11.15510	TevSTIB805.11_01.16040
Tb927.11.15520	TevSTIB805.11_01.16050
[truncated: 4,334 more rows]

## Sheet: kDNA proteins
List of 35 CDS in TevSTIB805ra orthologous to proteins involved in kDNA replication and transcription in T. brucei
A group of 35 TevSTIB805ra CDS homologous to T. brucei CDS known to be involved in kDNA replication and transcription were examined, and the vast majority were essentially the same as those found in Tb927. Only one protein, the ortholog of mitochondrial DNA polymerase beta-PAK (Tb927.5.2790), had a predicted loss of function due to an apparent frameshift in the proline/alanine/lysine rich N-termi…
T. brucei GeneID	T. evansi ortholog	Tb GeneDB Annotation	AA mismatches vs Tb927_v4 (ClustalW)	Is Start Met the Same?	Is Stop Codon the Same?	Is ORF Frameshifted?	Comments
Tb927.10.1900	TevSTIB805.10.2040	DNA topoisomerase IA, putative	1	Yes	Yes	No	Same amino acid change is found in T.b. gambiense and is an allelic variation in T.brucei
Tb927.10.340	TevSTIB805.10.380	mitochondrial structure specific endonuclease I (SSE-1), putative	1	Yes	Yes	No	Same amino acid change is found in T. vivax
Tb927.10.3690	TevSTIB805.10.3920	rRNA dimethyltransferase, putative	8	Yes	Yes	No	8 amino acid changes which are also found in T. b. gambiense (i.e. T evansi sequence is the same as the T. b gambiense sequence).
Tb927.10.6060	TevSTIB805.10.6410	universal minicircle sequence binding protein (UMSBP), putative,DNA-binding protein HEXBP, putative,zinc finger protein	0	Yes	Yes	No	100% identical protein but allelic variation Pro93Gln occurs in 37.5% in T. evansi. This allelic variation is not in one of the 7 zinc knuckle of the protein.
Tb927.10.6070	TevSTIB805.10.6420	universal minicircle sequence binding protein (UMSBP), putative,predicted zinc finger protein	0	Yes	Yes	No
Tb927.10.8890	TevSTIB805.10.9450	kinetoplast DNA-associated protein, putative	0	Yes	Yes	No
Tb927.10.8950	TevSTIB805.10.9510	kinetoplast DNA-associated protein, putative	0	Yes	Yes	No
Tb927.10.8970	TevSTIB805.10.9530	kinetoplast DNA-associated protein, putative	0	Yes	Yes	No
Tb927.10.8980	TevSTIB805.10.9540	hypothetical protein, conserved	1	Yes	Yes	No	Same amino acid change is found in T. b. gambiense
Tb927.10.900	TevSTIB805.10.990	hypothetical protein, conserved	0	Yes	Yes	No
Tb927.11.14790	TevSTIB805.11_01.15320	PIF 4 DNA repair and recombination helicase protein PIF1, putative	13	Yes	Yes	No	13 amino acid differences between T. brucei and T. evansi, 9 of which are the same in T. evansi and T. b. gambiense (and sometimes are allelic variations in T. brucei). 3 are allelic variations in T. evansi, none of these are in the 7 helicase domains nor in any of the 3 motifs of the PIF proteins. The last one, Arg530Met, is not in any of the 7 helicase domains nor in any of the 3 motifs of the …
Tb927.11.16400	TevSTIB805.11_01.16980	kinetoplast DNA-associated protein, putative	0	Yes	Yes	No
Tb927.11.3260	TevSTIB805.11_01.3350	mitochondrial DNA polymerase I protein D, putative	3	Yes	Yes	No	3 amino acid changes which are also found in T. b. gambiense
Tb927.11.3290	TevSTIB805.11_01.3380	P166 hypothetical protein, conserved	17	Yes	Yes	No	17 amino acid differences between T. brucei and T. evansi, 3 of which are also allelic variations found in T. brucei. All of these differences but 3 are also found in T. b. gambiense (i.e. T.b. gambiense sequence = T. evansi sequence), including an amino acid missing in the T. evansi sequence (4Q instead of 5Q in T. brucei, also missing in the T. b. gambiense sequence). The only substantial diffe…
Tb927.11.4690	TevSTIB805.11_01.4840	mitochondrial DNA polymerase I protein B, putative,DNA polymerase I-like protein B	0	Yes	Yes	No
Tb927.11.5780	TevSTIB805.11_01.5990	mitochondrial DNA-directed RNA polymerase	0	Yes	Yes	No
Tb927.11.6890	TevSTIB805.11_01.7090	DNA repair and recombination helicase protein PIF1, putative,DNA repair and recombination protein, mitochondrial precursor, putative	3	Yes	Yes	No	3 amino acid differences between Tb and Tevansi, 2 of which are the same in Tb gambiense and T evansi. The third one, Thr919Ser, is an allelic variation in Tevansi (57.6%) at the very end of the gene (10 amino acid before the end) and is not in a specific domain. It is a conserved mutation of polar uncharged amino acid, and thus the protein is probably functional.
Tb927.11.6900	TevSTIB805.11_01.7100	DNA repair and recombination helicase protein PIF1, putative,DNA repair and recombination protein, mitochondrial precursor, putative	6	Yes	Yes	No	6 amino acid changes which are also found in T. b. gambiense
Tb927.2.6100	TevSTIB805.2.3470	hypothetical protein, conserved	2	Yes	Yes	No	2 amino acid changes which are also found in T. b. gambiense
Tb927.3.1180	TevSTIB805.3.1150	hypothetical protein, conserved	4	Yes	Yes	No	4 amino acid differences (1 of them being an allelic variation). All are either at the beginning or at the end of the protein, where the Leishmania and T. cruzi sequences are the most divergent. No identified domain (hypothetical protein). The 3 differences which are not allelic variations are also found in T. b. gambiense
Tb927.3.860	TevSTIB805.3.790	acyl carrier protein, mitochondrial precursor, putative	0	Yes	Yes	No
Tb927.4.2950	TevSTIB805.4.3070	mitochondrial DNA polymerase I protein A, putative	6	Yes	Yes	No	6 amino acid differences, 5 of which are also found in T. b. gambiense. The last one, Val698Ala (conserved hydrophobic amino acid) is only in T. evansi and is at the very beginning (2nd amino acid) of a DNA polA domain. The protein is predicted to be functional.
Tb927.5.2780	TevSTIB805.5.3220	mitochondrial DNA polymerase beta	0	Yes	Yes	No
Tb927.5.2790	TevSTIB805.5.3230	mitochondrial DNA polymerase beta-PAK	5	Yes	Yes	Yes	1 frameshift and 5 amino acid changes, 4 of these amino acid changes are also found in T. b. gambiense and the T. brucei previously published (Saxowsky et al, JBC 2003). The last amino acid change is an allelic variation (conserved polar uncharged amino acid) in the mitochondrial localisation signal, which would probably not disturb the MLS. The frameshift is in the "proline rich extension" speci…
Tb927.7.3990	TevSTIB805.7.4260	mitochondrial DNA polymerase I protein C	5	Yes	Yes	No	6 amino acid changes, 5 of which are also found in T. b. gambiense, and for some in T. cruzi and T. vivax. The only change which is only in T. evansi (Ala634Val; allelic variation) is in a DNA helicase RuvA domain and is often either Ala or Leu in the domains alignments
Tb927.7.600	TevSTIB805.7.540	DNA ligase, putative,mitochondrial DNA ligase homolog, putative	1	Yes	Yes	No	Same amino acid change is found in T. b. gambiense
Tb927.7.610	TevSTIB805.7.550	DNA ligase, putative,mitochondrial DNA ligase homolog, putative	3	Yes	Yes	No	3 amino acid changes which are also found in T. b. gambiense
Tb927.7.1000	TevSTIB805.7.970	DNA repair and recombination helicase protein PIF1, putative;evidence=Inferred from Experiment	1	Yes	Yes	No	Same amino acid change is found in T.b .gambiense and is an allelic variation in T. brucei
Tb927.8.2550	TevSTIB805.8.2510	hypothetical protein, conserved	0	Yes	Yes	No
Tb927.8.2740	TevSTIB805.8.2720	mitochondrial RNA binding protein	0	Yes	Yes	No
Tb927.8.3560	TevSTIB805.8.3660	DNA repair and recombination helicase protein PIF1, putative,DNA repair and recombination protein, mitochondrial precursor, putative	5	Yes	Yes	No	5 amino acid changes which are also found in T. b. gambiense
Tb927.8.700	TevSTIB805.8.600	PIF 7 DNA repair and recombination helicase protein PIF1, putative,DNA repair and recombination protein, mitochondrial precursor, putative	2	Yes	Yes	No	2 amino acid differences, not found in T. b. gambiense. Changes are not in any of the 7 helicase domains nor in the 3 motifs of PIF proteins. Ala988Gly is 4 amino acid before the end and is a Pro in T. b. gambiense, thus this residue seems to be variable in different species and the protein is predicted to be functional.
Tb927.8.7260	TevSTIB805.8.7620	kinetoplast-associated protein, putative	7	Yes	Yes	No	Probably truncated, see Fig. S8D. This protein is very divergent amongst the different species of trypanosomes, with some segments of 20-40 amino acid missing in some species. There are 11 amino acid differences between T. brucei and T. evansi, 6 of which are also found in T. b. gambiense. The last 5 are allelic variations found only in T. evansi. They are either in a sequence missing from T. b. …
Tb927.9.5590	TevSTIB805.9.4110	DNA topoisomerase ii	2	Yes	Yes	No	1 amino acid change is also found in T. b. gambiense. The other amino acid change (Gly1198Cys; allelic variation in T. evansi) is at the very end of the protein (1221 amino acid protein), where variations are quite common. It is not in any domain and thus the protein is predicted to be functional.
Tb927.1.4010	TevSTIB805.1.3910	mitochondrial DNA primase 2 hypothetical protein, conserved	7	Yes	Yes	No	8 amino acid changes between T. evansi and T. brucei; 6 of which are also found in T. b. gambiense. The last 2 changes, Gln9Lys (allelic variation in T. evansi) and Ser708Thr (conserved polar uncharged mutation found only in T. evansi), are in a 750 amino acid N-terminal extension present in T. brucei (and T. evansi) and T. vivax which has very little sequence similarity between them (T. brucei a…

## Sheet: Editosome proteins
List of 22 CDS in TevSTIB805ra orthologous to editosome proteins in T. brucei
Orthologs of all editosome components were identified in TevSTIB805ra, and in most cases these T. evansi CDS are predicted to encode functional proteins. The lone exception is T. evansi KREX1, in which a block of amino acids within the C-terminal putative endonuclease/exonuclease/phosphatase (EEP) domain are mutated due to a frameshift. These changes only exist in T. evansi, and not in any of the…
T. brucei GeneID	T. evansi ortholog	Protein Name	AA mismatches vs Tb927_v4 (ClustalW)	Is Start Met the Same?	Is Stop Codon the Same?	Is ORF Frameshifted?	Comments
Tb927.1.1690	TevSTIB805.1.1620	KREN1	2	Yes	Yes	No	No changes in domains with predicted function; Gly638Ser Val471Ala and Ser insertion; unclear how these would affect protein function, sequence is closer to T. brucei protein than other TriTryps
Tb927.1.3030	TevSTIB805.1.2930	KREL2	5	Yes	Yes	No	Leu325Pro only change found only in T. evansi. No changes in domains with predicted functions or particular amino acids thought to be important for catalysis
Tb927.10.3570	TevSTIB805.10.3800	KREX2	5	Yes	Yes	No	Thr177Pro also found in T. b. gambiense and residue not conserved; His338Arg found in all other TriTryps and salivarians; Asp465Gly found in T.b. gambiense and not conserved; Leu555Ser found in salivarians and not conserved between T. brucei, TriTryps and salivarians; also found in T.b. gambiense and not conserved between T. brucei, TriTryps and salivarians. No changes in domains with predicted f…
Tb927.10.5110	TevSTIB805.10.5400	KREPA4	1	Yes	Yes	No	Asp71Glu; also Glu in T.b. gambiense; not predicted to affect protein function
Tb927.10.5120	TevSTIB805.10.5410	KREPA6	1	Yes	Yes	No	Ser155Ala; this residue also changes in T. cruzi and T. b. gambiense; Leishmania protein also has N and C terminal extensions
Tb927.10.5320	TevSTIB805.10.5650	KREN3	2	Yes	Yes	No	No changes in domains with predicted function; Asn475Tyr and Val426Ala-unclear how these would affect protein
Tb927.10.5440	TevSTIB805.10.5780	KREN2	5	Yes	Yes	No	Asn475Tyr and Val426Ala. Change not conserved in TriTryps or salivarians-evansi sequence is the same as T. b. gambiense. Changes are not in domains with predicted functions
Tb927.10.8210	TevSTIB805.10.8700	KREPA2	0	Yes	Yes	No	No changes
Tb927.11.2990	TevSTIB805.11_01.3070	KREPB4	4	Yes	Yes	No	Leu207Phe, Asp208Glu and Gly228Asp in degenerate RNaseIII domain; Leu207Phe and Asp208Glu also seen in T. b. gambiense; Gly228Asp also seen in all other TriTryps and T. b. gambiense. In other salivarians this residue is also not conserved
Tb927.11.8870	TevSTIB805.11_01.9110	KREH1	0	Yes	Yes	No	No changes
Tb927.11.940	TevSTIB805.11_01.950	KREPB5	2	Yes	No	No	Extra amino acids at C terminus; also observed in other salivarians and TriTryps; Arg8His and Leu43Val only observed in T. evansi, but not predicted to affect N terminal zinc finger
Tb927.2.2470	TevSTIB805.2.1390	KREPA1	7	Yes	Yes	No	Only Ala645Thr present in a region thought to be important for function (C-terminal SSB). However, this residue not conserved in TriTryps and salivarians (T. b. gambiense has Thr), and lies in a region between two beta-barrels
Tb927.7.1070	TevSTIB805.7.1040	KREX1	25	Yes	Yes	Yes	Heterozygous frame-shift causes a block of 18 adjacent amino acids to differ between T. evansi and T. brucei. Only T. evansi contains this block of changes in all the TriTryps and salivarians. These changes lie within the C-terminal region similar to a conserved domain found in EEP (endonuc/exonuc/phosphatase) family proteins. However, residues that are conserved and thought to be important for p…
Tb927.7.1550	TevSTIB805.7.1570	KRET2	0	Yes	Yes	No	No changes
Tb927.7.3950	TevSTIB805.7.4200	KRET1	5	Yes	Yes	No	No changes in domains with predicted functions or particular amino acids thought to be important for catalysis. Residues not conserved in TriTryps or salivarians
Tb927.8.620	TevSTIB805.8.520	KREPA3	2	Yes	Yes	No	Met32Ile is Ile in T. b. gambiense, and residue not conserved in TriTryps or salivarians; not predicted to affect protein function
Tb927.8.680	TevSTIB805.8.580	KREPA5	1	Yes	Yes	No	Pro72Ala also observed in T. b. gambiense; heterozygosity at this position in T. brucei
Tb927.8.5690	TevSTIB805.8.5950	KREPB8	1	Yes	Yes	No	Thr11Asn also observed in T. b. gambiense; not in region with predicted function
Tb927.9.4360	TevSTIB805.9.3190	KREL1	2	Yes	Yes	No	Ala396Val and Gly37Val residues also differ in other salivarians and TriTryps. Changes are not prediected to affect protein function
Tb927.9.5630	TevSTIB805.9.4140	KREPB7	1	Yes	Yes	No	Ala5Thr change also seen in T. cruzi, T. vivax and T. b. gambiense; not in domain with predicted function
Tb927.9.4440	TevSTIB805.9.3240	KREPB9	3	Yes	Yes	No	Three amino acid changes between T. brucei and T. evansi. Each of these residues is not conserved across TriTryps and salivarians, and in each case the T. evansi seqeunce matches the T. b. gambiense sequence.
Tb927.8.5700	TevSTIB805.8.5960	KREPB10	10	Yes	Yes	No	Two amino acid changes (Arg74Cys and Ala266Thr) only found in T. evansi (these residues are otherwise conserved across all TriTryps and salivarians. It is possible that Arg74Cys could affect the U1 zinc finger motif. However, there are C2H2 residues further downstream that form a zinc finger and that are conserved. Domain information is limited, butthese two changes are not predicted to affect pr…

## Sheet: Complexes I-IV
List of 97 CDS in TevSTIB805ra orthologous to Complexes I-IV in T. brucei
In T. brucei, as in other eukaryotes, the mitochondrial respiratory complexes consist of proteins encoded in both the nuclear and kinetoplast genomes. Maxicircles encode seven NADH:ubiquinone oxidoreductase (complex I) subunits (ND1, ND3-9), cytochrome b of complex III, and cytochrome oxidase (complex IV) subunits I-III. Many of these proteins are homologues of central components of the respirato…
T. brucei GeneID	T. evansi ortholog	GeneDB Annotation	AA mismatches vs Tb927_v4 (ClustalW)	Is Start Met the Same?	Is Stop Codon the Same?	Is ORF Frameshifted?	Comments
Complex I (47 CDS)
Tb927.1.730	TevSTIB805.1.670	hypothetical protein, conserved	4	Yes	Yes	No	Low conservation with other species
Tb927.10.12540	TevSTIB805.10.13140	electron transfer protein, putative,ferredoxin, putative (NUAM)	1	Yes	Yes	No	Highly conserved across species
Tb927.10.14860	TevSTIB805.10.15620	hypothetical protein, conserved	9	Yes	Yes	No	Low conservation with other species
Tb927.10.2230	TevSTIB805.10.2390	adrenodoxin reductase, putative,ferredoxin NADP reductase-like protein	5	Yes	Yes	No	Highly conserved across species
Tb927.10.7610	TevSTIB805.10.8080	hypothetical protein, conserved	4	Yes	Yes	No	Trypanosomatid Specific
Tb927.11.13910	TevSTIB805.11_01.14380	hypothetical protein, conserved	3	Yes	Yes	No	Trypanosomatid Specific
Tb927.11.15820	TevSTIB805.11_01.16370	superoxide dismutase, putative	2	Yes	Yes	No	Well conserved with bacterial homologues
Tb927.11.16870	TevSTIB805.11_01.17450	NADH dehydrogenase subunit NI8M, putative;evidence=Inferred from Sequence Alignment	0	Yes	Yes	No	Low conservation with other species
Tb927.11.3530	TevSTIB805.11_01.3650	hypothetical protein, conserved	0	Yes	Yes	No	Very low conservation with other species
Tb927.11.6980	TevSTIB805.11_01.7180	hypothetical protein, conserved	1	Yes	Yes	No	Trypanosomatid Specific
Tb927.2.4380	TevSTIB805.2.2270	hypothetical protein, conserved	5	Yes	Yes	No	Trypanosomatid Specific
Tb927.3.3660	TevSTIB805.3.3880	hypothetical protein, conserved	0	Yes	Yes	No	Trypanosomatid Specific
Tb927.3.860	TevSTIB805.3.790	acyl carrier protein, mitochondrial precursor, putative	0	Yes	Yes	No	Moderate conservation with other species
Tb927.5.3350	TevSTIB805.5.3850	iron superoxide dismutase, putative	3	Yes	Yes	No	Well conserved with bacterial homologues
Tb927.5.450	TevSTIB805.5.440	NADH-ubiquinone oxidoreductase, mitochondrial, putative (NUBM)	2	Yes	Yes	No	Highly conserved across species
Tb927.6.1410	TevSTIB805.6.1460	hypothetical protein, conserved	0	Yes	Yes	No	Trypanosomatid Specific
Tb927.6.2010	TevSTIB805.6.2060	hypothetical protein, conserved	2	Yes	Yes	No	Low conservation with bacterial homologues
Tb927.7.6350	TevSTIB805.7.6930	NADH-ubiquinone oxidoreductase, mitochondrial, putative (NUHM)	0	Yes	Yes	No	Well conserved across species
Tb927.7.7330	TevSTIB805.7.8060	hypothetical protein, conserved	2	Yes	Yes	No	Trypanosomatid Specific
Tb927.7.7410	TevSTIB805.7.8140	oxidoreductase, putative	1	Yes	Yes	No	Low conservation with other species
Tb927.8.4250	TevSTIB805.8.4380	hypothetical protein, conserved	1	Yes	Yes	No	Trypanosomatid Specific
Tb927.9.15270	TevSTIB805.9.10770	hypothetical protein, conserved	3	Yes	Yes	No	Trypanosomatid Specific
Tb927.9.7190	TevSTIB805.9.5190	oxidoreductase, putative	0	Yes	Yes	No	Low conservation with other species
Tb927.9.8410	TevSTIB805.9.6020	chaperone protein DNAj, putative	1	Yes	Yes	No	Well conserved across species
Tb927.9.9700	TevSTIB805.9.6940	hypothetical protein, conserved	0	Yes	Yes	No	Trypanosomatid Specific
Tb927.10.13620	TevSTIB805.10.14310	NADH-ubiquinone oxidoreductase complex I subunit,FT putative,NDUFA9 subunit, putative	1	Yes	Yes	No	Low conservation with other species
Tb927.10.4130	TevSTIB805.10.4390	NADH-ubiquinone oxidoreductase complex I subunit, putative,NDUFA5/B13 subunit, putative	2	Yes	Yes	No	Very low conservation with other species
Tb927.11.1320	TevSTIB805.11_01.1310	NADH-ubiquinone oxidoreductase 20 kDa subunit, mitochondrial precursor,NDUFS7 subunit	0	Yes	Yes	No	Well conserved across species
Tb927.9.15380	TevSTIB805.9.10850	NADH-ubiquinone oxidoreductase complex I subunit, putative,NDUFA9 subunit, putative	1	Yes	Yes	No	Moderate conservation with other species
Tb927.2.1680	TevSTIB805.2.870	cyclophilin-type peptidyl-prolyl cis-trans isomerase, putative	1	Yes	Yes	No	Highly conserved across species
Tb927.11.8910	TevSTIB805.11_01.9150	NADH dehydrogenase subunit NB6M, putative;evidence=Inferred from Sequence Orthology	0	Yes	Yes	No	Very low conservation with other species
Tb927.9.7190	TevSTIB805.9.5190	oxidoreductase, putative	0	Yes	Yes	No	Moderate conservation with other species
Tb927.10.1160	TevSTIB805.10.1260	hypothetical protein, conserved	1	Yes	Yes	No	Trypanosomatid Specific; this amino acid change only observed in T. evansi
Tb927.11.9930	TevSTIB805.11_01.10230	hypothetical protein, conserved (NIDM)	0	Yes	Yes	No	Trypanosomatid Specific
Tb927.11.15440	TevSTIB805.11_01.15970	hypothetical protein, conserved (LIR)	0	Yes	Yes	No	Very low conservation with other species
Tb927.11.15810	TevSTIB805.11_01.16360	NADH dehydrogenase subunit NI2M, putative;evidence=Inferred from Sequence Alignment	0	Yes	Yes	No	Very low conservation with other species
Tb927.4.4300	TevSTIB805.4.4480	hypothetical protein, conserved (SET domain superfamily)	11	Yes	Yes	No	Trypanosomatid Specific
Tb927.4.440	TevSTIB805.4.460	hypothetical protein, conserved	0	Yes	Yes	No	Trypanosomatid Specific
Tb927.7.3910	TevSTIB805.7.4140	hypothetical protein, conserved (nucleoside triphosphate hydrolase)	2	Yes	Yes	No	Low conservation with other species
Tb927.8.2530	TevSTIB805.8.2490	hypothetical protein, conserved	0	Yes	Yes	No	Very low conservation with other species
Tb927.9.15010	TevSTIB805.9.10600	hypothetical protein, conserved	1	Yes	Yes	No	Trypanosomatid Specific
Tb927.9.6710	TevSTIB805.9.4810	flavoprotein monooxygenase, putative	3	Yes	Yes	No	Very low conservation with other species; amino acid differences observed in T. evansi compared to T. brucei (W2L and N230S) also found in T. b. gambiense
Tb927.9.11660	TevSTIB805.9.8300	hypothetical protein, conserved	0	Yes	Yes	No	Very low conservation with other species
Tb927.10.5500	TevSTIB805.10.5840	hypothetical protein, conserved	0	Yes	Yes	No	Trypanosomatid Specific
Tb927.8.6960	TevSTIB805.8.7290	hypothetical protein, conserved	23	Yes	No	No	Trypanosomatid Specific; T. evansi CDS is a fusion of the Tb927.8.6960 and Tb927.8.6970 distinct ORFs in T. brucei
Tb927.11.4490	TevSTIB805.11_01.4620	long-chain-fatty acid-CoA ligase protein, putative,acyl-CoA synthetase, putative,fatty acid thiokinase (long chain), putative	1	Yes	Yes	No	Moderate conservation with other species; this amino acid change only observed in T. evansi
Tb927.8.5560	TevSTIB805.8.5810	hypothetical protein, conserved	3	Yes	Yes	No	Very low conservation with other species
Complex II (15 CDS)
Tb927.2.4700	TevSTIB805.2.2500	hypothetical protein, conserved	1	Yes	Yes	No	Homologue of T.cruzi SDH8 (PMID:19122194); Identified by TAP tagging in T. brucei (Acestor et al, 2011) (PMID: 21610103); Trypanosomatid Specific
Tb927.6.4130	TevSTIB805.6.4260	hypothetical protein, conserved	0	Yes	Yes	No	Homologue of T.cruzi SDH3 (PMID:19122194); Identified by TAP tagging in T. brucei (Acestor et al, 2011) (PMID: 21610103); Trypanosomatid Specific
Tb927.7.3590	TevSTIB805.7.3770	hypothetical protein, conserved	0	Yes	Yes	No	Identified by TAP tagging in T. brucei (Acestor et al, 2011) (PMID: 21610103); Trypanosomatid Specific
Tb927.8.1490	TevSTIB805.8.1400	hypothetical protein, conserved	0	Yes	Yes	No	Identified by TAP tagging in T. brucei (Acestor et al, 2011) (PMID: 21610103); Trypanosomatid Specific
Tb927.8.3380	TevSTIB805.8.3470	electron transfer protein, putative	0	Yes	Yes	No	Homologue of T.cruzi SDH2 N-terminal (PMID:19122194); Homologue of E.coli SDHB; Moderate conservation with other species
Tb927.8.5640	TevSTIB805.8.5900	hypothetical protein, conserved	2	Yes	Yes	No	Homologue of T.cruzi SDH6 (PMID:19122194); Identified by TAP tagging in T. brucei (Acestor et al, 2011) (PMID: 21610103); Trypanosomatid Specific
Tb927.8.6580	TevSTIB805.8.6900	succinate dehydrogenase flavoprotein, putative	0	Yes	Yes	No	Homologue of T.cruzi SDH1 (PMID:19122194); Homologue of E.coli SDHA; Highly conserved across species
Tb927.9.5960	TevSTIB805.9.4320	succinate dehydrogenase, putative	0	Yes	Yes	No	Homologue of T.cruzi SDH2 C-terminal (PMID:19122194); Homologue of E.coli SDHB; Moderate conservation with other species
Tb927.10.11770	TevSTIB805.10.12340	hypothetical protein, conserved	0	Yes	Yes	No	Homologue of T.cruzi SDH4 (PMID:19122194); Trypanosomatid Specific
Tb927.10.2680	TevSTIB805.10.2900	hypothetical protein, conserved	4	Yes	Yes	No	Homologue of T.cruzi SDH10 (PMID:19122194); Trypanosomatid Specific
Tb927.10.3040	TevSTIB805.10.3280	hypothetical protein, conserved	0	Yes	Yes	No	Homologue of T.cruzi SDH9 (PMID:19122194); Identified by TAP tagging in T. brucei (Acestor et al, 2011) (PMID: 21610103); Trypanosomatid Specific
Tb927.3.3460	TevSTIB805.3.3660	hypothetical protein, conserved	4	Yes	Yes	No	Homologue of T.cruzi SDH5 (PMID:19122194); Trypanosomatid Specific
Tb927.6.2490	TevSTIB805.6.2560	hypothetical protein, conserved	6	Yes	Yes	Yes	Homologue of T.cruzi SDH7 (PMID:19122194); Trypanosomatid Specific
Tb927.8.6890	TevSTIB805.8.7210	hypothetical protein, conserved	0	Yes	Yes	No	Homologue of T.cruzi SDH11 (PMID:19122194); Trypanosomatid Specific
Complex III (8 CDS)
Tb927.11.3980	TevSTIB805.11_01.4110	mitochondrial processing peptidase alpha subunit, putative,metallo-peptidase, Clan ME, Family M16	3	Yes	Yes	No	Identified by TAP tagging in T. brucei (Acestor et al, 2011) (PMID: 21610103); Low conservation with other species
Tb927.5.1060	TevSTIB805.5.1190	mitochondrial processing peptidase, beta subunit, putative,metallo-peptidase, Clan ME, Family M16	1	Yes	Yes	No	Identified by TAP tagging in T. brucei (Acestor et al, 2011) (PMID: 21610103); Moderate conservation with other species
Tb927.8.1890	TevSTIB805.8.1820	cytochrome c1, heme protein, mitochondrial precursor	0	Yes	Yes	No	Identified by TAP tagging in T. brucei (Acestor et al, 2011) (PMID: 21610103); Moderate conservation with other species
Tb927.9.14160	TevSTIB805.9.10120	reiske iron-sulfur protein , mitochondrial precursor	0	Yes	Yes	No	Identified by TAP tagging in T. brucei (Acestor et al, 2011) (PMID: 21610103); Moderate conservation with other species
Tb927.11.16510	TevSTIB805.11_01.17090	hypothetical protein, conserved	0	Yes	Yes	No	Identified by TAP tagging in T. brucei (Acestor et al, 2011) (PMID: 21610103); Trypanosomatid Specific
Tb927.8.6110	TevSTIB805.8.6380	hypothetical protein, conserved	4	Yes	Yes	No	Identified by TAP tagging in T. brucei (Acestor et al, 2011) (PMID: 21610103); Trypanosomatid Specific
Tb927.10.4280	TevSTIB805.10.4540	hypothetical protein, conserved	0	Yes	Yes	No	Identified by TAP tagging in T. brucei (Acestor et al, 2011) (PMID: 21610103); Homologue of Complex III subunit 7; Very low conservation with other species
Tb927.11.16220	TevSTIB805.11_01.16780	hypothetical protein, conserved	2	Yes	Yes	No	Identified by TAP tagging in T. brucei (Acestor et al, 2011) (PMID: 21610103); Trypanosomatid Specific
Complex IV (26 CDS)
Tb927.1.4100	TevSTIB805.1.4000	cytochrome oxidase subunit IV	2	Yes	Yes	No	COXIV identified (Maslov et al., 2002) (PMID:12467979); Identified by TAP tagging in T. brucei (Zíková et al, 2008) (PMID:18776036); Trypanosomatid Specific
Tb927.10.13600	TevSTIB805.10.14290	hypothetical protein, conserved,hypothetical protein	1	Yes	Yes	No	Identified by TAP tagging in T. brucei (Zíková et al, 2008) (PMID:18776036); Trypanosomatid Specific
Tb927.10.2550	TevSTIB805.10.2760	malate dehydrogenase-related;evidence=inferred from sequence or structural similarity	5	Yes	Yes	No	Identified by TAP tagging in T. brucei (Zíková et al, 2008) (PMID:18776036)
Tb927.10.4880	TevSTIB805.10.5170	hypothetical protein, conserved	2	Yes	Yes	No	Identified by TAP tagging in T. brucei (Zíková et al, 2008) (PMID:18776036); Trypanosomatid Specific
Tb927.10.5220	TevSTIB805.10.5520	hypothetical protein, conserved	5	Yes	Yes	No	Identified by TAP tagging in T. brucei (Zíková et al, 2008) (PMID:18776036); Trypanosomatid Specific
Tb927.11.10140	TevSTIB805.11_01.10450	hypothetical protein, conserved	0	Yes	Yes	No	Identified by TAP tagging in T. brucei (Zíková et al, 2008) (PMID:18776036); Trypanosomatid Specific
Tb927.11.13140	TevSTIB805.11_01.13580	cytochrome oxidase subunit X	0	Yes	Yes	No	Identified by TAP tagging in T. brucei (Zíková et al, 2008) (PMID:18776036); Trypanosomatid Specific
Tb927.11.2010	TevSTIB805.11_01.2040	hypothetical protein, conserved	2	Yes	Yes	No	Identified by TAP tagging in T. brucei (Zíková et al, 2008) (PMID:18776036); Trypanosomatid Specific
Tb927.3.1940	TevSTIB805.3.1960	hypothetical protein, conserved	5	Yes	Yes	No	Identified by TAP tagging in T. brucei (Zíková et al, 2008) (PMID:18776036); low conservation with hypothetical proteins in other organisms
Tb927.5.2580	TevSTIB805.5.2990	hypothetical protein, conserved	15	Yes	Yes	Yes	Identified by TAP tagging in T. brucei (Zíková et al, 2008) (PMID:18776036); Trypanosomatid Specific
Tb927.7.6990	TevSTIB805.7.7720	hypothetical protein, conserved	1	Yes	Yes	No	Identified by TAP tagging in T. brucei (Zíková et al, 2008) (PMID:18776036); Trypanosomatid Specific
Tb927.9.14200	TevSTIB805.9.10160	hypothetical protein, conserved	0	Yes	Yes	No	Identified by TAP tagging in T. brucei (Zíková et al, 2008) (PMID:18776036) Homologue of S. cerevisiae oms1p
Tb927.9.2450	TevSTIB805.9.1830	electon transport protein SCO1/SCO2, putative	2	Yes	Yes	No	Identified by TAP tagging in T. brucei (Zíková et al, 2008) (PMID:18776036); inserts copper ion into Complex IV
Tb927.9.3170	TevSTIB805.9.2330	cytochrome oxidase subunit V	1	Yes	Yes	No	Identified by TAP tagging in T. brucei (Zíková et al, 2008) (PMID:18776036); Trypanosomatid Specific
Tb927.9.7830	TevSTIB805.9.5660	hypothetical protein, conserved	1	Yes	Yes	No	Identified by TAP tagging in T. brucei (Zíková et al, 2008) (PMID:18776036); Trypanosomatid Specific
Tb927.9.10520	TevSTIB805.9.7520	hypothetical protein, conserved	1	Yes	Yes	No	Identified by TAP tagging in T. brucei (Zíková et al, 2008) (PMID:18776036); Trypanosomatid Specific
Tb927.11.12040	TevSTIB805.11_01.12420	hypothetical protein, conserved	2	Yes	Yes	No	Identified by TAP tagging in T. brucei (Zíková et al, 2008) (PMID:18776036); Trypanosomatid Specific
Tb927.11.4850	TevSTIB805.11_01.5030	hypothetical protein, conserved	3	Yes	Yes	No	Identified by TAP tagging in T. brucei (Zíková et al, 2008) (PMID:18776036); Trypanosomatid Specific
Tb927.3.1410	TevSTIB805.3.1380	cytochrome oxidase subunit VII	0	Yes	Yes	No	Identified by TAP tagging in T. brucei (Zíková et al, 2008) (PMID:18776036); Trypanosomatid Specific
Tb927.3.1890	TevSTIB805.3.1900	hypothetical protein, conserved	1	Yes	Yes	No	Identified by TAP tagging in T. brucei (Zíková et al, 2008) (PMID:18776036); Trypanosomatid Specific
Tb927.4.4620	TevSTIB805.4.4800	cytochrome oxidase subunit VIII	1	Yes	Yes	No	Identified by TAP tagging in T. brucei (Zíková et al, 2008) (PMID:18776036)
Tb927.5.3040	TevSTIB805.5.3510	hypothetical protein, conserved	3	Yes	Yes	No	Identified by TAP tagging in T. brucei (Zíková et al, 2008) (PMID:18776036); Trypanosomatid Specific
Tb927.11.1010	TevSTIB805.11_01.1020	chaperone protein DNAj, putative	2	Yes	Yes	No	Identified by TAP tagging in T. brucei (Zíková et al, 2008) (PMID:18776036); DNAj is also called HSP40 in other organisms
Tb927.9.10520	TevSTIB805.9.7520	hypothetical protein, conserved	1	Yes	Yes	No	Identified by TAP tagging in T. brucei (Zíková et al, 2008) (PMID:18776036); Trypanosomatid Specific
Tb927.10.280	TevSTIB805.10.320	cytochrome oxidase subunit VI	1	Yes	Yes	No	Identified by TAP tagging in T. brucei (Zíková et al, 2008) (PMID:18776036); Very low conservation with other species
Tb927.10.8320	TevSTIB805.10.8810	cytochrome oxidase subunit IX	0	Yes	Yes	No	Identified by TAP tagging in T. brucei (Zíková et al, 2008) (PMID:18776036); Trypanosomatid Specific
Cytochrome C (1 CDS)
Tb927.8.5120	TevSTIB805.8.5300	cytochrome c	1	Yes	Yes	No	Moderate conservation with other species

## Sheet: Complex V
List of 22 CDS in TevSTIB805ra orthologous to Complex V proteins in T. brucei
Analysis of TevSTIB805ra complex V components confirmed a deletion of residue A281 in the γ subunit of the F1 subcomplex, a mutation that has been shown to be important for permitting survival in the absence of kDNA [1]. Previously published reports indicated that specific mutations to this protein allow generation of the essential mitochondrial membrane potential in the absence of the kDNA-encod…
T. brucei GeneID	T. evansi ortholog	GeneDB Annotation	AA mismatches vs Tb927_v4 (ClustalW)	Is Start Met the Same?	Is Stop Codon the Same?	Is ORF Frameshifted?	Comments
Tb927.10.9830	TevSTIB805.10.10410	hypothetical protein, conserved	0	Yes	Yes	No
Tb927.10.1570	TevSTIB805.10.1680	ATPase subunit 9, putative	0	Yes	Yes	No
Tb927.10.180	TevSTIB805.10.220	ATP synthase F1 subunit gamma protein, putative	4	Yes	Yes	No	A281 deletion that has been shown to be involved in compensating for loss of kDNA. R48C potentially significant since only found in some T. evansi and T. equiperdum strains.
Tb927.10.5050	TevSTIB805.10.5340	hypothetical protein, conserved	0	Yes	Yes	No
Tb927.10.520	TevSTIB805.10.560	hypothetical protein, conserved	0	Yes	Yes	No
Tb927.10.8030	TevSTIB805.10.8520	hypothetical protein, conserved	1	Yes	Yes	No
Tb927.11.1270	TevSTIB805.11_01.1260	hypothetical protein, conserved	1	Yes	Yes	No
Tb927.11.600	TevSTIB805.11_01.540	hypothetical protein, conserved	0	Yes	Yes	No
Tb927.11.6250	TevSTIB805.11_01.6450	hypothetical protein, conserved	2	Yes	Yes	No
Tb927.2.3610	TevSTIB805.2.1920	hypothetical protein, conserved	1	Yes	Yes	No
Tb927.3.1380	TevSTIB805.3.1350	ATP synthase beta chain, mitochondrial precursor,ATP synthase F1, beta subunit	1	Yes	Yes	No	N395S mutation specific to T. evansi and also belongs to the Ct domain of the beta-subunit, known to contact the gamma subunit and potentially coupling rotation and catalysis. This mutation might disrupt an alpha-helix (homologous to amino acids 380-387 in F1 ATPase beta Bos taurus)
Tb927.3.1690	TevSTIB805.3.1700	hypothetical protein, conserved	0	Yes	Yes	No
Tb927.3.2180	TevSTIB805.3.2200	hypothetical protein, conserved	0	Yes	Yes	No
Tb927.3.2880	TevSTIB805.3.2940	hypothetical protein, conserved	0	Yes	Yes	No	T. evansi is the only salivarian trypanosome to have the L100S (heterozygous) mutation.
Tb927.4.3450	TevSTIB805.4.3540	hypothetical protein, conserved	0	Yes	Yes	No
Tb927.5.1710	TevSTIB805.5.1920	ribonucleoprotein p18, mitochondrial precursor, putative	1	Yes	Yes	No
Tb927.5.2930	TevSTIB805.5.3380	hypothetical protein, conserved	0	Yes	Yes	No
Tb927.5.3090	TevSTIB805.5.3560	hypothetical protein, conserved	0	Yes	Yes	No
Tb927.6.4990	TevSTIB805.6.5160	ATP synthase, epsilon chain, putative	0	Yes	Yes	No
Tb927.7.840	TevSTIB805.7.790	hypothetical protein, conserved	0	Yes	Yes	No
Tb927.7.7420	TevSTIB805.7.8150	ATP synthase alpha chain, mitochondrial precursor,ATP synthase F1, alpha subunit	1	Yes	Yes	No	Similarly to F1 subunit beta, there is a mutation in the Ct domain of subunit alpha: G510C.
Tb927.8.3320	TevSTIB805.8.3410	hypothetical protein, conserved	5	Yes	Yes	Yes	The I264M substitution is specific of T. evansi, but doesn't belong to any identified domain. T. cruzi has an I264Y similar mutation.

## Sheet: Mito Translation
List of 133 CDS in TevSTIB805ra orthologous to proteins involved in mitochondrial translation in T. brucei
The mitochondrial ribosome in T. brucei has been characterized to contain 77 proteins in the large subunit (LSU) and 56 proteins in the small subunit (SSU) [1]. Almost all proteins predicted for STIB805 have amino acid mismatches when compared with T. brucei TREU 927/4; however, none of these changes are of obvious significance. The LSU component TevSTIB805.11_01.4800 is the most diverged sequenc…
T. brucei GeneID	T. evansi ortholog	GeneDB Annotation	AA mismatches vs Tb927_v4 (ClustalW)	Is Start Met the Same?	Is Stop Codon the Same?	Is ORF Frameshifted?	Comments
LSU (77 CDS)
Tb927.1.1160	TevSTIB805.1.1110	hypothetical protein, conserved	3	Yes	Yes	No
Tb927.10.11050	TevSTIB805.10.11630	hypothetical protein, conserved	2	Yes	Yes	No
Tb927.10.11350	TevSTIB805.10.11930	hypothetical protein, conserved	0	Yes	Yes	No
Tb927.10.12050	TevSTIB805.10.12620	hypothetical protein, conserved	2	Yes	Yes	No
Tb927.10.1870	TevSTIB805.10.2010	hypothetical protein, conserved	1	Yes	Yes	No
Tb927.10.380	TevSTIB805.10.420	hypothetical protein, conserved	1	Yes	Yes	No
Tb927.10.6090	TevSTIB805.10.6440	tRNA pseudouridine synthase A, putative	2	Yes	Yes	No
Tb927.10.600	TevSTIB805.10.660	hypothetical protein, conserved	3	Yes	Yes	No
Tb927.10.7380	TevSTIB805.10.7850	hypothetical protein, conserved	0	Yes	Yes	No
Tb927.11.9830	TevSTIB805.11_01.10130	hypothetical protein, conserved	1	Yes	Yes	No
Tb927.11.10050	TevSTIB805.11_01.10360	hypothetical protein, conserved	0	Yes	Yes	No
Tb927.11.10080	TevSTIB805.11_01.10390	hypothetical protein, conserved	0	Yes	Yes	No
Tb927.11.10170	TevSTIB805.11_01.10480	hypothetical protein, conserved	1	Yes	Yes	No
Tb927.11.10570	TevSTIB805.11_01.10890	hypothetical protein, conserved	0	Yes	Yes	No
Tb927.11.14980	TevSTIB805.11_01.15510	hypothetical protein, conserved	3	Yes	Yes	No
Tb927.11.15500	TevSTIB805.11_01.16030	hypothetical protein, conserved	0	Yes	Yes	No
Tb927.11.1630	TevSTIB805.11_01.1620	hypothetical protein, conserved	5	Yes	Yes	No
Tb927.11.16990	TevSTIB805.11_01.17570	hypothetical protein, conserved	9	Yes	Yes	No
Tb927.11.3640	TevSTIB805.11_01.3780	hypothetical protein, conserved	1	Yes	Yes	No
Tb927.11.4650	TevSTIB805.11_01.4800	hypothetical protein, conserved	24	Yes	Yes	Yes
Tb927.11.5530	TevSTIB805.11_01.5730	hypothetical protein, conserved	5	Yes	Yes	No
Tb927.11.5880	TevSTIB805.11_01.6090	hypothetical protein, conserved	3	Yes	Yes	No
Tb927.11.5990	TevSTIB805.11_01.6200	hypothetical protein, conserved	2	Yes	Yes	No
Tb927.11.6000	TevSTIB805.11_01.6210	hypothetical protein, conserved	0	Yes	Yes	No
Tb927.11.8040	TevSTIB805.11_01.8350	hypothetical protein, conserved	2	Yes	Yes	No
Tb927.11.870	TevSTIB805.11_01.880	hypothetical protein, conserved	0	Yes	Yes	No
Tb927.11.9450	TevSTIB805.11_01.9740	cyclophilin type peptidyl-prolyl cis-trans isomerase, putative	0	Yes	Yes	No
Tb927.2.4890	TevSTIB805.2.2640	ribosomal protein L11, putative	1	Yes	Yes	No
Tb927.3.1710	TevSTIB805.3.1720	hypothetical protein, conserved	4	Yes	Yes	No
Tb927.3.5610	TevSTIB805.3.5910	ribosomal protein L3 mitochondrial, putative	0	Yes	Yes	No
Tb927.3.820	TevSTIB805.3.750	hypothetical protein, conserved	1	Yes	Yes	No
Tb927.4.1070	TevSTIB805.4.1120	50S ribosomal protein L13, putative	0	Yes	Yes	No
Tb927.4.1810	TevSTIB805.4.1880	hypothetical protein, conserved	0	Yes	Yes	No
Tb927.4.2720	TevSTIB805.4.2830	hypothetical protein, conserved	5	Yes	Yes	No
Tb927.4.4600	TevSTIB805.4.4780	hypothetical protein, conserved	0	Yes	Yes	No
Tb927.4.4610	TevSTIB805.4.4790	hypothetical protein, conserved	2	Yes	Yes	No
Tb927.4.930	TevSTIB805.4.980	50S ribosomal protein L14, putative	2	Yes	Yes	No
Tb927.5.2070	TevSTIB805.5.2390	hypothetical protein, conserved	2	Yes	Yes	No
Tb927.5.3110	TevSTIB805.5.3590	hypothetical protein, conserved	0	Yes	Yes	No
Tb927.5.3360	TevSTIB805.5.3860	50S ribosomal protein L2, putative	1	Yes	Yes	No
Tb927.5.3410	TevSTIB805.5.3910	hypothetical protein, conserved	0	Yes	Yes	No
Tb927.5.3870	TevSTIB805.5.4430	hypothetical protein, conserved	9	Yes	Yes	No
Tb927.5.3980	TevSTIB805.5.4540	hypothetical protein, conserved	0	Yes	Yes	No
Tb927.5.4120	TevSTIB805.5.4680	hypothetical protein, conserved	3	Yes	Yes	No
Tb927.6.1440	TevSTIB805.6.1490	hypothetical protein, conserved	2	Yes	Yes	No
Tb927.6.2480	TevSTIB805.6.2550	chaperone protein DNAj, putative	6	Yes	Yes	No
Tb927.6.3600	TevSTIB805.6.3730	hypothetical protein, conserved	1	Yes	Yes	No
Tb927.6.3930	TevSTIB805.6.4060	hypothetical protein, conserved	7	Yes	Yes	No
Tb927.6.4040	TevSTIB805.6.4170	hypothetical protein, conserved	0	Yes	Yes	No
Tb927.6.4080	TevSTIB805.6.4210	hypothetical protein, conserved	0	Yes	Yes	No
Tb927.6.4200	TevSTIB805.6.4330	hypothetical protein, conserved	7	Yes	Yes	No
Tb927.7.1640	TevSTIB805.7.1670	ras-like small GTPase, putative;evidence=traceable author statement	1	Yes	Yes	No
Tb927.7.2630	TevSTIB805.7.2720	hypothetical protein, conserved	10	Yes	Yes	No
Tb927.7.2760	TevSTIB805.7.2870	hypothetical protein, conserved	3	Yes	Yes	No
Tb927.7.2990	TevSTIB805.7.3100	hypothetical protein, conserved	1	Yes	Yes	No
Tb927.7.3430	TevSTIB805.7.3600	cyclophilin-type peptidyl-prolyl cis-trans isomerase, putative	0	Yes	Yes	No
Tb927.7.3460	TevSTIB805.7.3630	hypothetical protein, conserved	0	Yes	Yes	No
Tb927.7.3510	TevSTIB805.7.3680	hypothetical protein, conserved	1	Yes	Yes	No
Tb927.7.3960	TevSTIB805.7.4210	50S ribosomal protein L16, putative	0	Yes	Yes	No
Tb927.7.4140	TevSTIB805.7.4430	hypothetical protein, conserved	1	Yes	Yes	No
Tb927.7.4550	TevSTIB805.7.4900	60S ribosomal protein-like	0	Yes	Yes	No
Tb927.7.4710	TevSTIB805.7.5100	hypothetical protein, conserved	3	Yes	Yes	No
Tb927.7.6800	TevSTIB805.7.7450	hypothetical protein, conserved	1	Yes	Yes	No
Tb927.7.7010	TevSTIB805.7.7750	hypothetical protein, conserved	2	Yes	Yes	No
Tb927.8.1880	TevSTIB805.8.1810	hypothetical protein, conserved	1	Yes	Yes	No
Tb927.8.2760	TevSTIB805.8.2740	hypothetical protein, conserved	0	Yes	Yes	No
Tb927.8.3170	TevSTIB805.8.3250	hypothetical protein, conserved	1	No	Yes	No
Tb927.8.3300	TevSTIB805.8.3390	hypothetical protein, conserved	11	Yes	Yes	No
Tb927.8.5860	TevSTIB805.8.6120	50S ribosomal protein L17, putative	0	Yes	Yes	No
Tb927.9.14050	TevSTIB805.9.10030	hypothetical protein, conserved	7	Yes	Yes	No
Tb927.9.3350	TevSTIB805.9.2470	pseudouridylate synthase, putative	1	Yes	Yes	No
Tb927.9.3640	TevSTIB805.9.2710	hypothetical protein, conserved	0	Yes	Yes	No
Tb927.9.7170	TevSTIB805.9.5170	hypothetical protein, conserved	2	Yes	Yes	No
Tb927.9.8290	TevSTIB805.9.5920	hypothetical protein, conserved	3	Yes	Yes	No
Tb927.9.9150	TevSTIB805.9.6490	GTP-binding protein, putative	0	Yes	Yes	No
Tb927.9.12850	TevSTIB805.9.9250	hypothetical protein, conserved	3	Yes	Yes	No
Tb927.11.11630	TevSTIB805.11_01.12000	hypothetical protein, conserved	1	Yes	Yes	No
SSU (56 CDS)
Tb927.1.1200	TevSTIB805.1.1140	hypothetical protein, conserved	1	Yes	Yes	No
Tb927.1.2990	TevSTIB805.1.2890	hypothetical protein, conserved	6	Yes	Yes	No
Tb927.10.10400	TevSTIB805.10.10990	hypothetical protein, conserved	1	Yes	Yes	No
Tb927.10.11260	TevSTIB805.10.11830	hypothetical protein, conserved	0	Yes	Yes	No
Tb927.10.11820	TevSTIB805.10.12380	hypothetical protein, conserved	1	Yes	Yes	No
Tb927.10.13300	TevSTIB805.10.13940	30S ribosomal protein S8, putative	1	Yes	Yes	No
Tb927.10.13820	TevSTIB805.10.14520	hypothetical protein, conserved	0	Yes	Yes	No
Tb927.10.15650	TevSTIB805.10.16480	tRNA pseudouridine synthase A-like protein	5	Yes	Yes	No
Tb927.10.16090	TevSTIB805.10.16950	hypothetical protein, conserved	12	Yes	Yes	No
Tb927.10.2800	TevSTIB805.10.3030	hypothetical protein, conserved	0	Yes	Yes	No
Tb927.10.3250	TevSTIB805.10.3500	hypothetical protein, conserved	1	Yes	Yes	No
Tb927.10.3580	TevSTIB805.10.3810	hypothetical protein, conserved	2	Yes	Yes	No
Tb927.10.6300	TevSTIB805.10.6650	hypothetical protein, conserved	1	Yes	Yes	No
Tb927.10.6850	TevSTIB805.10.7230	hypothetical protein, conserved	1	Yes	Yes	No
Tb927.11.10150	TevSTIB805.11_01.10460	hypothetical protein, conserved	1	Yes	Yes	No
Tb927.11.10400	TevSTIB805.11_01.10710	hypothetical protein, conserved	1	Yes	Yes	No
Tb927.11.1250	TevSTIB805.11_01.1240	hypothetical protein, conserved	7	Yes	Yes	No
Tb927.11.15850	TevSTIB805.11_01.16400	hypothetical protein, conserved	3	Yes	Yes	No
Tb927.11.2530	TevSTIB805.11_01.2600	hypothetical protein, conserved	4	Yes	Yes	No
Tb927.11.5060	TevSTIB805.11_01.5250	hypothetical protein, conserved	1	Yes	Yes	No
Tb927.11.5500	TevSTIB805.11_01.5700	hypothetical protein, conserved	1	Yes	Yes	No
Tb927.11.7790	TevSTIB805.11_01.8100	hypothetical protein, conserved	2	Yes	Yes	No
Tb927.2.4400	TevSTIB805.2.2290	hypothetical protein, conserved	7	Yes	Yes	No
Tb927.3.2260	TevSTIB805.3.2280	hypothetical protein, conserved	2	Yes	Yes	No
Tb927.3.5240	TevSTIB805.3.5530	hypothetical protein, conserved	2	Yes	Yes	No
Tb927.3.770	TevSTIB805.3.700	hypothetical protein, conserved	0	Yes	Yes	No
Tb927.3.970	TevSTIB805.3.920	hypothetical protein, conserved	2	Yes	Yes	No
Tb927.4.3690	TevSTIB805.4.3780	hypothetical protein, conserved	1	Yes	Yes	No
Tb927.5.1510	TevSTIB805.5.1690	hypothetical protein, conserved	2	Yes	Yes	No
Tb927.5.1790	TevSTIB805.5.2010	hypothetical protein, conserved	3	Yes	Yes	No
Tb927.5.3640	TevSTIB805.5.4160	hypothetical protein, conserved	3	Yes	Yes	No
Tb927.5.4040	TevSTIB805.5.4600	hypothetical protein, conserved	4	Yes	Yes	No
Tb927.6.1250	TevSTIB805.6.1320	hypothetical protein, conserved	4	Yes	No	No
Tb927.6.2080	TevSTIB805.6.2130	hypothetical protein, conserved	0	Yes	Yes	No
Tb927.6.2180	TevSTIB805.6.2250	hypothetical protein, conserved	2	Yes	Yes	No
Tb927.6.4080	TevSTIB805.6.4210	hypothetical protein, conserved	0	Yes	Yes	No
Tb927.6.4560	TevSTIB805.6.4690	hypothetical protein, conserved	3	Yes	Yes	No
Tb927.6.4580	TevSTIB805.6.4710	hypothetical protein, conserved	0	Yes	Yes	No
Tb927.6.4930	TevSTIB805.6.5100	hypothetical protein, conserved	0	Yes	Yes	No
Tb927.7.2620	TevSTIB805.7.2710	hypothetical protein, conserved	5	Yes	Yes	No
Tb927.7.3050	TevSTIB805.7.3170	hypothetical protein, conserved	10	Yes	Yes	No
Tb927.7.3240	TevSTIB805.7.3410	hypothetical protein, conserved	1	Yes	Yes	No
Tb927.8.1430	TevSTIB805.8.1340	hypothetical protein, conserved	0	Yes	Yes	No
Tb927.8.3110	TevSTIB805.8.3190	hypothetical protein, conserved	0	Yes	Yes	No
Tb927.8.4550	TevSTIB805.8.4700	hypothetical protein, conserved	0	Yes	Yes	No
Tb927.8.4860	TevSTIB805.8.5020	hypothetical protein, conserved	3	Yes	Yes	No
Tb927.8.5200	TevSTIB805.8.5390	hypothetical protein, conserved	9	Yes	Yes	No
Tb927.8.5280	TevSTIB805.8.5470	hypothetical protein, conserved	0	Yes	Yes	No
Tb927.9.5280	TevSTIB805.9.3880	hypothetical protein, conserved	1	Yes	Yes	No
Tb927.9.6510	TevSTIB805.9.4660	hypothetical protein, conserved	3	Yes	Yes	No
Tb927.9.11120	TevSTIB805.9.7940	hypothetical protein, conserved	0	Yes	Yes	No
Tb927.9.11280	TevSTIB805.9.8090	30S Ribosomal protein S17, putative	1	Yes	Yes	No
Tb927.9.11880	TevSTIB805.9.8510	hypothetical protein, conserved	1	Yes	Yes	No
Tb927.9.13780	TevSTIB805.9.9940	hypothetical protein, conserved	1	Yes	Yes	No
Tb927.11.11470	TevSTIB805.11_01.11850	hypothetical protein, conserved	0	Yes	Yes	No
Tb927.11.11870	TevSTIB805.11_01.12250	hypothetical protein, conserved	5	Yes	Yes	No
